# A novel system for classifying tooth root phenotypes

Jason Gellis<sup>1¶\*</sup>, Robert Foley<sup>1¶</sup>

#a Department of Archaeology, The Leverhulme Centre for Human Evolutionary Studies,  
University of Cambridge, Cambridge, England

#b Department of Archaeology, The Leverhulme Centre for Human Evolutionary Studies,  
University of Cambridge, Cambridge, England

\*Corresponding author: Jason Gellis

Email: [jg760@cam.ac.uk](mailto:jg760@cam.ac.uk) (JG)

¶ These authors contributed equally to this work.

## 1 Abstract

2  
3 Human root and canal number and morphology are highly variable, and internal root  
4 canal form and count does not necessarily co-vary directly with external morphology. While  
5 several typologies and classifications have been developed to address individual  
6 components of teeth, there is a need for a comprehensive system, that captures internal  
7 and external root features across all teeth. Using CT scans, the external and internal root  
8 morphologies of a global sample of humans are analysed (n=945). From this analysis a  
9 method of classification that captures external and internal root morphology in a way that is  
10 intuitive, reproducible, and defines the human phenotypic set is developed. Results provide  
11 a robust definition of modern human tooth root phenotypic diversity. Our method is  
12 modular in nature, allowing for incorporation of past and future classification systems.  
13 Additionally, it provides a basis for analysing hominin root morphology in evolutionary,  
14 ecological, genetic, and developmental contexts.

## 15 16 Introduction

17  
18 Human dental morphology is a diverse collection of non-metric traits: cusp numbers,  
19 fissure and ridge patterns, root number and shape, and even congenital absence. Recording  
20 systems, such as the widely utilized Arizona State University Dental Anthropology System  
21 (ASUDAS) [1,2], have been developed to catalogue these traits and their variants under a  
22 standardized scoring procedure; and to study how these variants are partitioned within and  
23 between populations. However, dental trait scoring systems are overwhelmingly focused on  
24 tooth crown morphology, with less attention paid to roots. Like tooth crowns, roots exhibit  
25 considerable variability in number, morphology, and size. For example, premolars have been  
26 reported as having between one to three roots [3,4], while maxillary and mandibular molars  
27 have between one and five roots [5–8]. The literature has also long recognized several  
28 unusual morphological variants such as Tomes' root [9], taurodont roots [10], and C-shaped  
29 roots [11]. Additionally, the diversity of the canal system, both in number and configuration,  
30 has been an area of extensive study (Table 1).

31 As the number of catalogued external and internal morphologies grow, there is an  
32 increasing need for a comprehensive system, that can be used for documented and new

33 morphotypes, and is robustly capable of describing the total human tooth root phenotype.  
34 The aim of this study is to 1) systematically describe the diverse internal and external  
35 morphologies of the human tooth root complex (i.e., all roots present in an individual  
36 tooth); and 2) define, develop, and provide a comprehensive system that captures these  
37 morphologies in all the teeth of both jaws for analysis.

## 38 **Background**

39  
40 The studies discussed below have addressed root number, canal number, external  
41 root morphology, canal morphology, and canal configuration independently. However, they  
42 comprise only parts of the tooth root complex, and thus provide a basis for a  
43 comprehensive phenotype system.

### 44 **Root number**

45 Root number is probably the best studied element of root morphology, as counting  
46 roots is easily accomplished in extracted and in-situ teeth. Early studies of roots were  
47 primarily descriptive of root number, and the occasional metrical analysis [12,13,22–26,14–  
48 21]. Maxillary premolars are reported as having the most variation in number of roots, with  
49 a higher percentage of P<sup>3</sup>s having two roots (or at least bifurcated apices), while P<sup>4</sup> is  
50 typified by one root. Three rooted maxillary premolars (P<sup>3</sup> and P<sup>4</sup>) have been documented in  
51 modern humans [4,17,18,20,27,28] but are extremely rare. Scott and Turner [2] report a  
52 world frequency of 4.9-65% for two-rooted premolars. Their results show that Sub-Saharan  
53 Africans have the highest frequency at 65%, 40% in West Eurasian populations, 20-30% in  
54 East Asian populations, and 5-15% in Northeast Siberians and Native Americans. In contrast  
55 to the maxilla, the most frequent form of mandibular P<sub>3</sub>s and P<sub>4</sub>s is single rooted; though P<sub>3</sub>s  
56 are occasionally two-rooted or, more rarely, three rooted [29–31].

57 Maxillary molars are generally three rooted; though molars with two, four [32,33]  
58 and five [34] roots have been reported. Variation in root number has been recorded for  
59 three rooted M<sup>2</sup>s; with Australian Aboriginals having the highest reported percentage at  
60 95.8% [15]. Sub-Saharan Africans also have a high frequency of three-rooted M<sup>2</sup>s at 85%,  
61 Western Eurasians and East Asians ranging from 50-70% and American Arctic populations  
62 ranging from 35-40% [2]. Three European samples by Fabian, Hjelmmann, and Visser (in  
63 [24]) report an average of 56.6%, in accordance with Scott and Turner [2]. Inuit populations

64 are lower with East Greenland populations at 23.7% [22] and 30.7-31.3% in two prehistoric  
65 Alaskan populations [35].

66 Unlike their maxillary counterparts, mandibular molars are less variable in root  
67 number. A rare exception, mandibular molars sometimes exhibit a third accessory root (Fig  
68 1). They are generally smaller than the mesial and distal roots of the mandibular molars, and  
69 most frequently appear in lower first molar. In the ASUDAS these are referred to as three  
70 rooted molars [35]. The clinical literature applies a different typology and identifies several  
71 variants. These include – (1) The radix entomolaris (En) accessory root arising from the  
72 lingual surface of the distal root; (2) the radix paramolaris (Pa) arising from buccal side of  
73 the distal root; and (3), furcation root (Fu) projecting from the point of bifurcation between  
74 roots [36].

75

76

77 **Fig 1. Examples of accessory roots.** Mandibular molars with A1 and A2: radix entomolaris  
78 (left=distolingual surface, right = lingual surface), B: M<sub>3</sub> with radix entomolaris (lingual view),  
79 C: M<sub>1</sub> with furcation root (buccal view), D: M<sub>1</sub> with fused radix paramolaris (buccal view).  
80 Modified from Calbersen et al., [36].

81

82 The entomolaris trait is expressed with high frequency (20-25%) in Sino-American  
83 populations (East Asia, North East Siberia, American arctic), with one Aleut population  
84 exhibiting a sample frequency of 50% [2,37]. The trait also appears in 15.6% of North  
85 American Athabascans and Algonquin Native American tribes [38]. Tratman [19] claimed the  
86 trait showed a distinct dichotomy between European and Asian populations, as did  
87 Pedersen [22]. Comparatively, this trait appears in less than 1% of populations from Sub-  
88 Saharan Africa, West Eurasia, and New Guinea (ibid). The trait has been reported in extinct  
89 hominins [39], but see Scott et al., [40] for a further discussion.

90 Single rooted molars usually appear in three forms: C-shaped M<sub>2s</sub>, taurodont M<sub>1s</sub>-  
91 M<sub>3s</sub>, and pegged M<sup>3s</sup>/M<sub>3s</sub> (Fig 2, A-C). C-shaped molars are common in Chinese populations  
92 with a frequency as high as 40% [41]. The trait has a low frequency of 0-10% in Sub-Saharan  
93 Africans [42], 1.7% in Australian Aboriginals [15], and 4.4% in the Bantu (Shaw, 1931). Rare  
94 in modern humans, taurodont molars occur when the root trunk and internal pulp cavity are  
95 enlarged and apically displaced. This form was first classified by Keith [10] in *Homo*  
96 *neanderthalensis*. Externally, taurodont roots are cylindrical in shape (Fig 2B). While  
97 sometimes confused with C-shaped molars, taurodont roots lack an internal and external

98 180° arc, and are instead circular in cross-section, usually with a bifid apical third. Pegged  
99 third molars are the most variable in size and morphology [35]. Their reduction has a genetic  
100 component and patterned geographical variation [35,43]. Pegged third molar roots are  
101 associated with a reduced crown, appear more frequently in the maxilla than the mandible,  
102 and are circular in cross-section

103 Multi-rooted anterior teeth are exceptionally rare [44]. Alexandersen [45] compiled  
104 data on double rooted mandibular canines from several European countries, two Danish  
105 Neolithic samples, and two medieval samples; in which they attain a frequency of 4.9 -10%.  
106 His findings suggest that the double rooted canine trait is a European marker. However, Lee  
107 and Scott [46] found the variant in 1-4% of an East Asian population sample (Central Plains  
108 China, Western China and Mongolia, Northern China, Ordos Region, and Southern China).  
109 The authors interpreted this as possible evidence of an eastward migration of Indo-  
110 European speaking groups into China and Mongolia.

111  
112 Fig 2. **Unusual root forms.** A. C-shaped tooth in (clockwise from top left) lingual, cross-section  
113 at the cemento-enamel junction, cervical third, middle third, apical third, and apical views. B.  
114 Taurodont molar, apically displaced pulp chamber and canals outlined in white. C. Peg-shaped  
115 root. Images A, C from the Root Canal Anatomy Project  
116 <http://rootcanalanatomy.blogspot.com/> (accessed 10 March 2021). Image B from  
117 <http://www.dentagama.com> (accessed 27th March 2021).  
118

## 119 External Root morphology

120  
121 Studies of root morphologies in cross-section have recognised forms such as 'plate-  
122 like' and 'dumb-bell', in the mandibular molars of humans, great apes, cercopithecoids, and  
123 Plio-Pleistocene hominins [47–50]; while cross sections of australopith anterior teeth have  
124 been described as 'ovoid' [51]. Though these descriptions appear from time to time in the  
125 literature, they are inconsistently applied, have not been described in detail required for  
126 comparative studies, or codified into a classification system which can be consistently  
127 applied.

128 Some exceptions exist. Tomes' roots [9] have a long history of study in the  
129 anthropological literature, and are included in the ASUDAS. These single rooted teeth are  
130 part of a morphological continuum in which the mesial surface of the root displays, in  
131 varying degrees of depth, a prominent developmental groove [1]. Tomes first described this  
132 root configuration in modern human mandibular premolars and classified it as a deviation

133 from the “normal” European single rooted premolar (ibid). Tomes’ root appears in 10% of  
134 P<sub>3</sub>s and P<sub>4</sub>s of the Pecos Native American Tribe [18], 36.9% of P<sub>3</sub>s and 8.4% for P<sub>4</sub>s in the  
135 Bantu [17], and >25% for Sub-Saharan African groups [2]. In contrast, P<sub>3</sub> Tomes’ roots  
136 account for 0-10% of Western Eurasian populations and 10-15% of North and East Asian  
137 population (ibid). In its most extreme form, the groove appears on mesial and distal surface,  
138 and can result in bifurcation of the root. In cross section, Tomes’ roots have a V-shaped  
139 ‘notch’ where the two radicals are dividing. Occasionally, this division results in bifid apices  
140 or two separate roots, depending on the level of bifurcation [52].

141 Another unusual morphology, the C-shaped molar (Fig 2A) consists of a single root in  
142 an 180° arc, with a buccally oriented convex edge, and are most common in the 2nd  
143 mandibular molar [8,41]. In certain cases, two mandibular molar roots are fused on their  
144 buccal side giving them the appearance of C-shaped molars; however, the two forms are not  
145 homologous and can be discerned by the former’s lack of a uniform, convex external buccal  
146 surface, and C-shaped canal.

147 Occasionally two roots can become fused (Fig 3). The reasons for fusion are unclear,  
148 but may be due to suppression or incomplete fusion of the developing tooth root’s  
149 interradicular processes during root formation [53,54]. Fused roots can be joined by  
150 dentine, have linked pulp chambers and/or canals [55]. In such a scenario adjacent root  
151 structures are apparent, but their separation is incomplete. Fused roots are most common  
152 in the post-canine tooth row of the maxillary arch.

153

154 Fig 3. **Fusion of multiple roots into right single roots in maxillary 2nd molars.** A. fused  
155 mesial E and distal G root types. B. fused mesial E and distal H root types. C. fused lingual G  
156 and distal P root types. Images A, B, and C from the Root Canal Anatomy Project  
157 <https://rootcanalanatomy.blogspot.com/> (accessed 10 March 2020).

158

## 159 **Root canals**

160

161 In its simplest form, a root canal resembles a tapered cylinder, extending from the  
162 pulp chamber beneath the crown, and exiting the root apex. Often, individual canals are  
163 circular or ovoid in cross section, even when multiple canals appear in the same root (Fig 4).

164

165 Fig 4. **Canal morphologies in cross section.** Left to right: Round and ovoid canal forms. Gray  
166 is canal shape, black is external form of the tooth root.

167

168 With exception of the anterior teeth, this is rarely the case, and there are often multiple  
169 canal configurations within a single root (Fig 5). A wide range of canal configurations have  
170 been reported [11,56–58], though the number of configurations vary by study. Often, these  
171 discrepancies are due to the inclusion or exclusion of accessory canals (lateral and furcation  
172 canals), which branch from the main canal structure, like the roots of a tree, at the point of  
173 bifurcation or the apical third. However, most practitioners opt to exclude these from  
174 typologies as they are not continuous structures from the pulp chamber to the root apex.  
175

176 Fig 5. **Vertucci's widely used canal classification system.** Root and canal number do not  
177 always conform to one another. Black area represents pulp chambers and various canal  
178 configurations [56].  
179

180 In conjunction with external form, canal morphology has proven useful for hominin  
181 classification [59–62]. In mandibular premolars, researchers have shown that combined  
182 external morphologies and canal configurations can differentiate robust and gracile  
183 australopiths [61,63,64]. However, it is unclear how internal variation relates to external  
184 morphology or is partitioned between and across populations.  
185

## 186 **Canal classification systems**

187

188 The most widely used canal typology system contains eight types (Fig 5), which can,  
189 theoretically, be found in any tooth in the jaws [56]. However, this classification system  
190 does not include all known canal types. For example, canal isthmuses - complete or  
191 incomplete connections between two round canals are frequently found in molars (Fig 6,  
192 left), though they appear in other roots [58]. These canal configurations are distinct from  
193 those described by Vertucci et al., [56] . Likewise, C-shaped canals have been the subject of  
194 several studies [8,65,66], and their configurations are nearly identical (though ordered  
195 differently) to the canal isthmuses described by Hsu and Kim [58], only stretched around an  
196 180° arc (Fig 6, right). These same isthmus canal configurations can also be found in Tomes'  
197 roots [67,68].  
198

199 Fig 6. **Two different classification methods for canal isthmuses.** Left: Canal isthmuses,  
200 modified from Hsu and Kim [58]. Right: C-shaped root canals, modified from Fan et al., [11].

201  
 202 Many classification systems have been introduced (Table 1). However, they often  
 203 focus on one tooth type or morphology. Of the 27 traits catalogued by the ASUDAS, only  
 204 root number for specific teeth ( $P^3$ ,  $M^2$ ,  $C_1$ ,  $M_1$ , and  $M_2$ ) and external morphology (Tomes'  
 205 root) are included [1]. Others systems are only focused on the canal configurations of  
 206 maxillary premolars [33], the mesial canals of mandibular 1<sup>st</sup> and 2<sup>nd</sup> molars [69], or more  
 207 narrowly, unusual canal types such as isthmus [58] or C-shaped canals [11,66]. Others  
 208 propose separate classificatory nomenclature based on root number[57], or maxillary [70]  
 209 and mandibular molars [71].

210

211 Table 1. Previous typological studies of tooth roots and canals in modern humans.

| <b>Authors</b>                | <b>Technique</b>                                  | <b>Roots</b> | <b>Canals</b> | <b>Teeth</b>                                    |
|-------------------------------|---------------------------------------------------|--------------|---------------|-------------------------------------------------|
| Tomes [9]                     | Direct observation                                | Yes          | -             | Premolars                                       |
| Keith [10]                    | Direct observation                                | Yes          | Yes           | Molars                                          |
| Ackerman et al.,[72]          | Radiography                                       | Yes          | Yes           | Molars                                          |
| Vertucci et al., [56]         | Direct observation using dye                      | -            | Yes           | Maxillary premolars                             |
| Abbot [73]                    | Direct observation, radiography                   | Yes          | Yes           | All teeth, focus on premolars                   |
| Turner et al., [1]            | Direct observation                                | Yes          | -             | All                                             |
| Carlsen and Alexandersen [74] | Direct observation                                | Yes          | -             | Mandibular molars                               |
| Hsu and Kim [58]              | Sectioning of tooth, direct observation using dye | -            | Yes           | Maxillary and mandibular pre- and first molars. |
| Fan et al., [11]              | Radiography                                       | Yes          | Yes           | 2nd mandibular molar                            |
| Moore et al., [61]            | CT                                                | Yes          | Yes           | Premolars                                       |
| Ahmed et al., [57]            | micro CT                                          | -            | Yes           | All                                             |

212  
 213 While canal number and morphology do not always conform to external number and  
 214 morphology [50,55,61], the literature on the relationship between internal and external  
 215 morphologies is sometimes inconsistent. For example, Vertucci *et al.* [56] categorize  
 216 maxillary premolars with two separate canals as type IV (Fig 6). However, it is unclear if this  
 217 classification is to be applied only to two canals encased in a single or two-rooted tooth.  
 218 Canal shape can also change over time due to dentin deposition [75]. While some variation  
 219 may be due to age and/or biomechanical factors, there is currently no methodology to  
 220 classify these changes.

221

## 222 Materials and Methods

223



## 224 CT scans

225

226 Using cone-beam computed tomography (CBCT or CT), we analysed both sides of the  
227 maxillary and mandibular dental arcades of individuals (n= 945) from osteological collections  
228 housed at the Smithsonian National Museum of Natural History (SI), American Museum of  
229 Natural History (AMNH), and the Duckworth Collection (DC) at the University of Cambridge  
230 Leverhulme Centre for Human Evolutionary Studies. Full skulls of specimens from the SI and  
231 AMNH were scanned by Dr. Lynn Copes [76] using a Siemens Somatom spiral scanner (70  
232  $\mu\text{A}$ , 110 kV, slice thickness 1.0 mm, reconstruction 0.5 mm, voxel size  $\text{mm}^3$ :  
233  $1.0 \times 1.0 \times 0.3676$ ). Full skulls of specimens from the DC were scanned by Professor Marta  
234 Mirazón-Lahr and Dr. Frances Rivera [77] using a Siemens Somatom Definition Flash scanner  
235 at Addenbrooke's Hospital, Cambridge England (80 $\mu\text{A}$ , 120kV, slice thickness 0.6mm, voxel  
236 size  $\text{mm}^3$ :  $0.3906 \times 0.3906 \times 0.3$ ). For all collections, crania and mandibles were oriented on  
237 the rotation stage, with the coronal plane orthogonal to the x-ray source and detector.  
238 Permission to use the scans has been granted by Dr. Copes, Professor Mirazón-Lahr and Dr.  
239 Rivera. A complete list and description of individuals included in this study is listed in the S1  
240 table.

241 Transverse CT cross sections of roots and canals were assessed in the coronal, axial,  
242 and sagittal planes across the CT stack, using measurement tools in the Horos Project Dicom  
243 Viewer (Fig 7) version 3.5.5 [78]. Only permanent teeth with completely developed roots  
244 and closed root apices were used for this study. While information for all teeth from both  
245 sides of the maxillary and mandibular arcades was recorded, only the right sides were used  
246 to avoid issues with asymmetry and artificially inflated sample size.

247

248 **Fig 7. Horos Dicom Viewer 2D orthogonal view used to assess root and canal**  
249 **morphologies.** Left: Coronal view at mid-point of roots. Centre: Anterior view at midpoint of  
250 roots. Right: Lateral view at midpoint of roots

251

## 252 External root morphology

253 External root morphology was assessed at the measured mid-point of the root,  
254 bounded by the cemento-enamel junction (CEJ) and root apex/apices. The midpoint was  
255 chosen as a point of inspection because (a) the root has extended far enough from the CEJ,  
256 and in the case of multi-rooted teeth, from the neighboring roots to be structurally and

257 developmentally distinct [79]; and (b) at a point in the eruptive phase in which the adjoined  
258 tooth crown is in functional occlusion [80]; and, (c) does not reflect the morphological  
259 alteration common to the penetrative phase in which the apical third of the root becomes  
260 roughened and/or suffers ankylosis or concrescence due to penetration of the bones of the  
261 jaws [80].

262

## 263 **Root and canal number**

264 To determine root and canal number, we apply the Turner Index [1], which  
265 compares the point of bifurcation (POB) relative to total root or canal length. When this  
266 ratio is greater than 33% of the total root or canal length, the root or canal is classified as  
267 multi-rooted. When the ratio is less than 33% the root or canal is considered single rooted,  
268 or with a bifid apical third (Fig 8). Here, we define a single root canal as a canal which  
269 extends from the pulp chamber within the crown and exits at a single foramen. We do not  
270 include accessory canals in our study.

271

272 Fig 8. **Determination of root and canal number.** Left = Distal view of single-rooted premolar  
273 with bifurcation of the apical third of the root. Middle: Lingual view of double-rooted  
274 mandibular molar. Right: Distal root of double-rooted mandibular molar with examples of  
275 canal counts in solid gray. Dotted gray lines indicate canal/s position in root. CEJ = Cemento-  
276 enamel junction, POB = Point of bifurcation, Solid gray = canals. CT = cervical third, MT =  
277 middle third, AT = apical third.

278

## 279 **Canal morphology and configuration**

280

281 Individual canals are circular or ovoid in cross section. Here we classify circular, or  
282 round canals as R, and ovoid canals as O. These are appended numerically to reflect the  
283 number of canals present. For example, R2 simply describes two, distinct circular canals,  
284 while O describes a single ovoid canal (Fig 9).

285

286 Fig 9. **Canal morphologies in cross section.** Gray is canal shape, black is external form of the  
287 tooth root.

288

289 To classify canal configurations, we have simplified canal configurations into five  
290 categories, R-R5, that reflect canal number and account for fusion/division of canals (Fig 10).

291 These categories can be found in any tooth and are applied to single roots within the root

292 complex (e.g., 3 roots, each with a single canal, would not be designated R3, but R for each  
293 canal per root).

294

295 Fig 10. **Canal counts and degrees of separation.** Solid grey = root canal forms. CT = cervical  
296 third, MT = middle third, AT = apical third.

297

298 Because C-shaped canal configurations [11] are nearly identical to the canal  
299 isthmuses described by Hsu and Kim [58] (Fig 6), we combined and simplified both isthmus  
300 and C-shaped canal systems into one (Fig 11). We describe five categories for canal  
301 isthmuses. Here, i1 is defined as a single root with two unconnected canals (here classified  
302 as R2, Figs 9 & 10); i2 is defined as a complete connection between separate canals; i3 is  
303 defined by one or both canals extending into the isthmus area, but without complete  
304 connection; i4 is defined by an incomplete connection between three (sometimes  
305 incomplete) canals; and i5 is defined as a thin or sparse connection between two canals.  
306 These same isthmus canal configurations can also be found in Tomes' roots.

307

308 Fig 11. **Combined isthmus classification system.** Based on systems developed by Hsu and  
309 Kim [58] and Fan et al. [11]. Black is external root form and grey is canal form. P = plate-  
310 shaped, Cs = C-shaped, and T = Tomes' root.

311

## 312 **Anatomical descriptions**

313 Categorically, incisors are indicated by an I, canines a C, premolars with P, and  
314 molars use M. Tooth numbers are labelled with super- and subscripts to differentiate the  
315 teeth of the maxilla and mandible. For example, M<sup>1</sup> indicates the 1st maxillary molar while  
316 M<sub>1</sub> indicates the 1st mandibular molar. Numerically, incisors are numbered either 1 or 2 for  
317 central and lateral incisors respectively. Canines are marked 1 as there exists only one  
318 canine in each quadrant of the jaws. Through the course of evolution, apes and old world  
319 monkeys have lost the first and second premolars of their evolutionary ancestors, thus the  
320 remaining 2 premolars are numbered 3 and 4 [81,82].

321 Unlike the anatomical surfaces and directions used for tooth crowns, there exists no  
322 formula for tooth roots. However, classical anatomical terms – mesial, buccal, distal, lingual,  
323 or combinations of (e.g., mesio-buccal), can be used to describe the location of roots and  
324 canals. Additionally, we use the term axial to describe a single or centrally located canal

325 within a single-rooted tooth. Because anatomical location rather than anatomical surface is  
 326 being employed, buccal replaces labial (for anterior teeth) when describing roots.

327

## 328 Results

329

330

331

332

333

334

335

336

337

338

339

340

341

342

343

344

345

We analysed CT scans of 5,970 teeth (Table 2) of 945 individuals from a global sample (supplementary material) to identify morphologies which are useful for classifying the tooth root complex of modern human teeth. We first present descriptive statistics of external and internal morphologies found in our sample. We then define and present a novel tooth root classification system comprised of phenotype elements, each of which describes a property of the individual roots, and the root complex as a whole. Each element (E) within the set provides information on root (E1) and canal (E2) number; identification and location of roots and canals in the root complex (E3); external root form (E4); and (E5) internal canal forms and configurations. Combined elements (for example root number and internal canal form combined together) can be treated as phenotypes or separated and analysed by their constituent parts. The system, described below, allows us to define a finite set of possible root phenotypes and their permutations (the realized phenotypic set) and analyse diversity in a constrained morphospace.

Table 2: Tooth counts of the right side of the maxillary and mandibular dental arcades.

| <b>Tooth</b>       | <b>n</b> | <b>Tooth</b>       | <b>n</b> | <b>Total</b> |
|--------------------|----------|--------------------|----------|--------------|
| Maxilla            |          | Mandible           |          |              |
| I <sup>1</sup>     | 204      | I <sub>1</sub>     | 204      | 408          |
| I <sup>2</sup>     | 248      | I <sub>2</sub>     | 247      | 495          |
| I <sup>2</sup> CON | 1        | I <sup>2</sup> CON | 1        | -            |
| C <sup>1</sup>     | 406      | C <sub>1</sub>     | 295      | 701          |
| P <sup>3</sup>     | 515      | P <sub>3</sub>     | 343      | 858          |
| P <sup>4</sup>     | 467      | P <sub>4</sub>     | 313      | 780          |
| M <sup>1</sup>     | 697      | M <sub>1</sub>     | 410      | 1,107        |
| M <sup>2</sup>     | 596      | M <sub>2</sub>     | 385      | 981          |
| M <sup>3</sup>     | 362      | M <sub>3</sub>     | 278      | 640          |
| M <sup>3</sup> CON | 28       | M <sup>3</sup> CON | 25       | -            |
| Total              | 3,495    | -                  | 2,475    | 5,970        |

346

347

348

Superscript = maxilla, subscript = mandible. I = incisor, C = canine, P = premolar, M = molar. CON = congenitally absent teeth (discussed in section 1.5).

349

## 350 Root number

351

352 In aggregate, the number of roots in teeth from our sample are between one and  
 353 four (Table 3). Anterior teeth almost always having a single root, the exception being two  
 354 mandibular canines, premolars between one and three roots, and molars between one and  
 355 four roots. Entomolaris, or three-rooted molars, appear in 18.05 % M<sub>1</sub>S, 1.23% of M<sub>2</sub>S, and  
 356 5.94% of M<sub>3</sub>S, while paramolaris appears in 3.63% of M<sub>3</sub>S.

357

358 Table 3: Number of roots in teeth of the maxilla and mandible by tooth

| Tooth          | Root number | n   | Total Roots | % of teeth* | Tooth          | Root number | n   | Total Roots | % of teeth* |
|----------------|-------------|-----|-------------|-------------|----------------|-------------|-----|-------------|-------------|
| Maxilla        |             |     |             |             | Mandible       |             |     |             |             |
| I <sup>1</sup> | 1           | 204 | 204         | 100.00      | I <sub>1</sub> | 1           | 204 | 204         | 100.00      |
| I <sup>2</sup> | 1           | 248 | 248         | 100.00      | I <sub>2</sub> | 1           | 247 | 247         | 100.00      |
| C <sup>1</sup> | 1           | 406 | 406         | 100.00      | C <sub>1</sub> | 1           | 293 | 297         | 99.32       |
|                |             |     |             |             |                | 2           | 2   |             | 0.68        |
| P <sup>3</sup> | 1           | 295 | 739         | 57.28       | P <sub>3</sub> | 1           | 341 | 345         | 99.42       |
|                | 2           | 216 |             | 41.94       |                | 2           | 2   |             | 0.58        |
|                | 3           | 4   |             | 0.78        |                |             |     |             |             |
| P <sup>4</sup> | 1           | 405 | 530         | 86.72       | P <sub>4</sub> | 1           | 313 | 313         | 100.0       |
|                | 2           | 61  |             | 13.06       |                |             |     |             |             |
|                | 3           | 1   |             | 0.22        |                |             |     |             |             |
| M <sup>1</sup> | 1           | 2   | 2,060       | 0.29        | M <sub>1</sub> | 2           | 336 | 894         | 81.95       |
|                | 2           | 28  |             | 4.02        |                | 3En         | 74  |             | 18.05       |
|                | 3           | 666 |             | 95.55       |                |             |     |             |             |
|                | 4           | 1   |             | 0.14        |                |             |     |             |             |
| M <sup>2</sup> | 1           | 56  | 1,561       | 9.39        | M <sub>2</sub> | 1           | 49  | 727         | 12.73       |
|                | 2           | 117 |             | 19.63       |                | 2           | 330 |             | 85.71       |
|                | 3           | 421 |             | 70.64       |                | 3           | 1   |             | 0.26        |
|                | 4           | 2   |             | 0.34        |                | 3En         | 5   |             | 1.30        |
| M <sup>3</sup> | 1           | 89  | 831         | 24.59       | M <sub>3</sub> | 1           | 20  | 563         | 7.19        |
|                | 2           | 82  |             | 22.65       |                | 2           | 231 |             | 83.09       |
|                | 3           | 186 |             | 51.38       |                | 3En         | 16  |             | 5.76        |
|                | 4           | 5   |             | 1.38        |                | 3Pa         | 11  |             | 3.96        |

359 \* From Table 2. Congenitally absent teeth not included in statistics for this table.

360 En = Entomolaris, Pa = Paramolaris.

361

## 362 Canal number

363

364 Teeth in our study contain between one and six canals (Table 4), and it is not  
 365 uncommon for a single root to contain two or more canals, especially in the molars. With  
 366 the exception of I<sup>1</sup>, all single rooted anterior teeth have a double canaled variant. Molars

367 have the most canals per tooth, with M<sup>1</sup>s showing the most variation. With the exception of  
 368 I<sup>1</sup>, canal number exceeds root number (Table 3).

369

370 Table 4: Number of canals per tooth in the maxilla and mandible by tooth

| Tooth          | Canal number | n   | Total Canals | % of teeth* | Tooth           | Canal number | n   | Total Canals | % of teeth* |
|----------------|--------------|-----|--------------|-------------|-----------------|--------------|-----|--------------|-------------|
| <u>Maxilla</u> |              |     |              |             | <u>Mandible</u> |              |     |              |             |
| I <sup>1</sup> | 1            | 204 | 204          | 100.00      | I <sub>1</sub>  | 1            | 180 | 228          | 88.24       |
|                |              |     |              |             |                 | 2            | 24  |              | 11.76       |
| I <sup>2</sup> | 1            | 247 | 249          | 99.60       | I <sub>2</sub>  | 1            | 208 | 286          | 84.21       |
|                | 2            | 1   |              | 0.40        |                 | 2            | 39  |              | 15.79       |
| C <sup>1</sup> | 1            | 405 | 407          | 99.75       | C <sub>1</sub>  | 1            | 273 | 317          | 92.54       |
|                | 2            | 1   |              | 0.25        |                 | 2            | 22  |              | 7.46        |
| P <sup>3</sup> | 1            | 82  | 959          | 15.92       | P <sub>3</sub>  | 1            | 254 | 435          | 74.05       |
|                | 2            | 422 |              | 81.94       |                 | 2            | 86  |              | 25.07       |
|                | 3            | 11  |              | 2.14        |                 | 3            | 3   |              | 0.87        |
| P <sup>4</sup> | 1            | 233 | 708          | 49.89       | P <sub>4</sub>  | 1            | 300 | 326          | 95.85       |
|                | 2            | 228 |              | 48.82       |                 | 2            | 13  |              | 4.15        |
|                | 3            | 5   |              | 1.07        |                 |              |     |              |             |
|                | 4            | 1   |              | 0.22        |                 |              |     |              |             |
| M <sup>1</sup> | 2            | 4   | 2,431        | 0.57        | M <sub>1</sub>  | 2            | 27  | 1,431        | 6.59        |
|                | 3            | 355 |              | 50.93       |                 | 3            | 167 |              | 40.73       |
|                | 4            | 333 |              | 47.78       |                 | 4            | 205 |              | 50.00       |
|                | 5            | 4   |              | 0.57        |                 | 5            | 10  |              | 2.44        |
|                | 6            | 1   |              | 0.14        |                 | 6            | 1   |              | 0.24        |
| M <sup>2</sup> | 1            | 8   | 1,910        | 1.34        | M <sub>2</sub>  | 1            | 2   | 1,107        | 0.52        |
|                | 2            | 21  |              | 3.52        |                 | 2            | 93  |              | 24.16       |
|                | 3            | 408 |              | 68.46       |                 | 3            | 241 |              | 62.60       |
|                | 4            | 159 |              | 26.68       |                 | 4            | 49  |              | 12.73       |
| M <sup>3</sup> | 1            | 32  | 1,065        | 8.84        | M <sub>3</sub>  | 1            | 10  | 748          | 3.60        |
|                | 2            | 24  |              | 6.63        |                 | 2            | 86  |              | 30.94       |
|                | 3            | 239 |              | 66.02       |                 | 3            | 162 |              | 58.27       |
|                | 4            | 67  |              | 18.51       |                 | 4            | 20  |              | 7.19        |

371 \* From Table 2. Congenitally absent teeth not included in statistics for this table.

372

### 373 **Anatomical orientation of canals in the root complex**

374

375 The majority of teeth follow a similar anatomical pattern of having axially (A)  
 376 oriented, buccal (B) and lingually (L) oriented, or mesially (M), distally (D), and lingually (L)  
 377 oriented canals and roots. Other orientations, for example MB1DB1ML1DL1R, are relatively  
 378 rare, and only appear in molars. In cases where there are multiple canals appear in a single  
 379 root these are almost always found in the mesial or buccal orientations (e.g., M2D1L1, B2L1).

380

381

382

383 Table 5: Anatomical orientation of the canals in the maxilla and mandible by tooth

| Tooth          | External morphology | n   | % of teeth* | Tooth          | External morphology | n   | % of teeth* |
|----------------|---------------------|-----|-------------|----------------|---------------------|-----|-------------|
|                | <u>Maxilla</u>      |     |             |                | <u>Mandible</u>     |     |             |
| I <sup>1</sup> | A                   | 204 | 100.00      | I <sub>1</sub> | A                   | 180 | 88.24       |
|                |                     |     |             |                | B1L1                | 24  | 11.76       |
| I <sup>2</sup> | A                   | 247 | 99.60       | I <sub>2</sub> | A                   | 208 | 84.21       |
|                | B1L1                | 1   | 0.40        |                | B1L1                | 39  | 15.79       |
| C <sup>1</sup> | A                   | 405 | 99.75       | C <sub>1</sub> | A                   | 273 | 92.54       |
|                | B1L1                | 1   | 0.25        |                | B1L1                | 22  | 7.46        |
| P <sup>3</sup> | A                   | 82  | 15.92       | P <sub>3</sub> | A                   | 254 | 74.05       |
|                | B1L1                | 421 | 81.75       |                | B1L1                | 86  | 25.07       |
|                | B1L2                | 1   | 0.19        |                | M1D1L1              | 3   | 0.87        |
|                | B2L1                | 6   | 1.17        |                |                     |     |             |
|                | M1D1                | 1   | 0.19        |                |                     |     |             |
|                | M1D1L1              | 4   | 0.78        |                |                     |     |             |
| P <sup>4</sup> | A                   | 233 | 49.89       | P <sub>4</sub> | A                   | 300 | 95.85       |
|                | B1L1                | 228 | 48.82       |                | B1L1                | 13  | 4.15        |
|                | B2L1                | 3   | 0.65        |                |                     |     |             |
|                | B2L2                | 1   | 0.21        |                |                     |     |             |
|                | M1D1L1              | 2   | 0.43        |                |                     |     |             |
| M <sup>1</sup> | B1L1                | 3   | 0.43        | M <sub>1</sub> | M1D1                | 27  | 6.59        |
|                | M1D1                | 1   | 0.14        |                | M1D1L1              | 12  | 2.93        |
|                | M1D1L1              | 354 | 50.80       |                | M2D1                | 156 | 38.05       |
|                | M1D1L2              | 2   | 0.29        |                | M2D1L1              | 59  | 14.39       |
|                | M1D2                | 1   | 0.14        |                | M2D2                | 144 | 35.12       |
|                | M1D2L1              | 1   | 0.14        |                | M2D2L1              | 3   | 0.73        |
|                | M1L1                | 1   | 0.14        |                | M2D3                | 5   | 1.22        |
|                | M2D1                | 1   | 0.14        |                | M3D1                | 1   | 0.24        |
|                | M2D1L1              | 327 | 47.07       |                | M3D2                | 2   | 0.49        |
|                | M2D1L2              | 2   | 0.29        |                | M3D3                | 1   | 0.24        |
|                | M2D2L1              | 1   | 0.14        |                |                     |     |             |
|                | M2D2L2              | 1   | 0.14        |                |                     |     |             |
|                | M3D1L1              | 1   | 0.14        |                |                     |     |             |
|                | MB1DB1ML1DL1        | 1   | 0.14        |                |                     |     |             |
| M <sup>2</sup> | A                   | 8   | 1.34        | M <sub>2</sub> | A                   | 2   |             |
|                | B1L1                | 20  | 3.36        |                | B1D1L1              | 1   |             |
|                | M1B1D1L1            | 1   | 0.17        |                | B2L1                | 2   |             |
|                | M1D1                | 1   | 0.17        |                | B2L2                | 1   |             |
|                | M1D1L1              | 408 | 68.46       |                | M1B1D1              | 7   |             |
|                | M1D2L1              | 2   | 0.33        |                | M1D1                | 93  |             |
|                | M2D1L1              | 153 | 25.67       |                | M1D1L1              | 1   |             |
|                | MB1DB1ML1DL11       | 2   | 0.33        |                | M1D2                | 1   |             |
|                | ML3D1               | 1   | 0.17        |                | M2D1                | 229 |             |
|                |                     |     |             |                | M2D1L1              | 4   |             |
|                |                     |     |             |                | M2D2                | 42  |             |
|                |                     |     |             |                | M3D1                | 2   |             |
| M <sup>3</sup> | A                   | 32  | 8.84        | M <sub>3</sub> | A                   | 10  |             |
|                | B1L1                | 17  | 4.70        |                | B2L1                | 1   |             |
|                | B2D1L1              | 1   | 0.28        |                | M1B1D1              | 8   |             |
|                | M1B1D1L1            | 2   | 0.55        |                | M1B2D1              | 1   |             |

|               |     |       |        |     |
|---------------|-----|-------|--------|-----|
| M1D1          | 7   | 1.93  | M1D1   | 84  |
| M1D1L1        | 235 | 64.92 | M1D1L1 | 9   |
| M1D1L2        | 1   | 0.28  | M2B1D1 | 2   |
| M1D2          | 3   | 0.83  | M2D1   | 147 |
| M1D2L1        | 1   | 0.28  | M2D1L1 | 9   |
| M2D1          | 1   | 0.28  | M2D2   | 6   |
| M2D1L1        | 45  | 12.43 | M3D1   | 1   |
| M2D2          | 11  | 3.04  |        |     |
| MB1DB1ML1DL1R | 5   | 1.38  |        |     |
| ML3D1         | 1   | 0.28  |        |     |

384 \* From Table 2. Congenitally absent teeth not included in statistics for this table. A = axial, M = mesial, B =  
 385 Buccal, D = Distal, L = Lingual.

386

### 387 External root morphology at midpoint

388

389 Similar to the variation found in tooth cusp morphology [1], external root  
 390 morphologies exist as distinctive, yet easily recognizable anatomical variants (Fig 12). While  
 391 these morphologies frequently extend through the apical third to the apex of the root,  
 392 occasionally they are bifid (Bi), and we have noted this where applicable.

393

394

395 Fig 12. **External root morphologies.** Left and right columns = axial CT slices showing external  
 396 root morphologies at the middle third (MT) and apical third (AT). Centre illustrations = root  
 397 morphologies at centre of root/s.

398

399 Though some of these morphologies have been discussed in the literature, their  
 400 descriptions are inconsistent (e.g., hourglass, plate). Table 6 includes definitions and  
 401 descriptions of the root morphologies shown in Fig 12. Two of the morphologies, wedge (W)  
 402 and kidney (K), are described here for the first time.

403

404 Table 6: Description of external tooth root morphologies at the midpoint

| Morphology     | Description                                                                                                                                                                                                                                                                                                                                        | Reference  |
|----------------|----------------------------------------------------------------------------------------------------------------------------------------------------------------------------------------------------------------------------------------------------------------------------------------------------------------------------------------------------|------------|
| Globular (G)   | Round or circular in shape. While this form varies greatly in size, it is relatively invariant in shape, and in that all edges are relatively equidistant from the center.                                                                                                                                                                         | [83]       |
| Elliptical (E) | While size, and distance of the edges from the center vary, elliptical shaped roots are distinct from others in that they look like a squashed circle. Sometimes these forms are perfectly symmetrical and other times they resemble an egg. However, a consistent feature are their continuously smooth edges which are concentric to the canals. | [61,80,83] |
| Wedge (W)      | Wedge shaped roots are easily distinguished by their 'tapered' appearance. Sometimes these forms take the shape of a triangle with three edges and corners, while other times                                                                                                                                                                      | This study |



|               |                                                                                                                                                                                                                                                                                                                                                                                                                                                                                                                                                                     |                                                                              |
|---------------|---------------------------------------------------------------------------------------------------------------------------------------------------------------------------------------------------------------------------------------------------------------------------------------------------------------------------------------------------------------------------------------------------------------------------------------------------------------------------------------------------------------------------------------------------------------------|------------------------------------------------------------------------------|
|               | they appear more teardrop shaped with a slight constriction in the middle. However, they are easily distinguished as the buccal end is always noticeably wider than the lingual end.                                                                                                                                                                                                                                                                                                                                                                                |                                                                              |
| Hourglass (H) | Hourglass shaped roots have often been confused with plate-shaped roots, or occasionally, elliptical roots. However, this form is distinct and easily identified by its bulbous ends and constricted center. This constriction can be so pronounced that the root appears almost as a lemniscate in cross-section.                                                                                                                                                                                                                                                  | This study, but see [47–49] for complimentary and contradictory definitions. |
| Kidney (K)    | Kidney shaped roots are defined by their opposite convex and concave sides. Sometimes these curvatures are pronounced, and other times they are more subtle. However, these two features are always apparent, and distinct from other forms.                                                                                                                                                                                                                                                                                                                        | This study                                                                   |
| Plate (P)     | Plate shape roots are similar to hourglass and elliptical roots in their dimensions but are easily distinguished by their flat edges. In some variants the corners are rounded, while in others they are square.                                                                                                                                                                                                                                                                                                                                                    | This study, but see [47–49] for complimentary and contradictory definitions. |
| Tomes' (T)    | Tomes' roots have been documented for nearly a century and appear in a number of classification systems including the ASUDAS. They are single rooted teeth that appear to be 'splitting' into two roots. In cross section they sometimes look like c-shaped molar roots. However, one of their distinguishing features is that they are only found in mandibular premolars.                                                                                                                                                                                         | [1,9]                                                                        |
| C-shaped (CS) | C-shape molars are primarily found in the second molars of the mandible, though they rarely appear in the first and third mandibular molars as well. There is a substantial clinical literature covering their distinct morphology and prevalence. Unlike Tomes' roots they do not appear to be splitting into two roots. Rather, they are a single, continuous root structure. Like kidney shaped roots they have opposite convex and concave sides. However, their curvature is more pronounced, in nearly a 180° arc with ends that are parallel to one another. | [8,11,84]                                                                    |

405

406 External root morphologies appear in different frequencies in each tooth, and some  
 407 morphologies do not appear in some teeth at all (Table 7). The number of morphologies  
 408 increase posteriorly along the tooth row, and M<sub>1</sub>s have the most morphologies. Part of this  
 409 is due to the number of bifid (Bi) variants (e.g., EBi, PBi, etc.), as well as the presence of  
 410 pegged and fused roots (Tables 8 and 9, respectively).

411

412 Table 7: Number of external root morphologies in the maxilla and mandible by tooth

| Tooth          | External morphology | n   | % of roots* | Tooth           | External morphology | n   | % of roots* |
|----------------|---------------------|-----|-------------|-----------------|---------------------|-----|-------------|
| <u>Maxilla</u> |                     |     |             | <u>Mandible</u> |                     |     |             |
| I <sup>1</sup> | E                   | 69  | 33.82       | I <sub>1</sub>  | E                   | 13  | 6.37        |
|                | G                   | 117 | 57.35       |                 | G                   | 1   | 0.49        |
|                | P                   | 8   | 3.92        |                 | K                   | 3   | 1.47        |
|                | W                   | 10  | 4.91        |                 | P                   | 177 | 86.76       |
|                |                     |     |             |                 | W                   | 10  | 4.90        |

|                |                  |      |       |                |       |       |       |
|----------------|------------------|------|-------|----------------|-------|-------|-------|
| I <sup>2</sup> | E                | 120  | 48.39 | I <sub>2</sub> | E     | 7     | 2.83  |
|                | G                | 25   | 10.08 |                | H     | 1     | 0.40  |
|                | P                | 97   | 39.11 |                | K     | 10    | 4.05  |
|                | W                | 6    | 2.42  |                | P     | 219   | 88.66 |
| C <sup>1</sup> | W                | 6    | 2.42  | W              | 10    | 4.05  |       |
|                | E                | 149  | 36.70 | C <sub>1</sub> | E     | 54    | 18.18 |
|                | EBi <sup>†</sup> | 1    | 0.25  | G              | 6     | 2.02  |       |
|                | G                | 4    | 0.99  | H              | 6     | 2.02  |       |
|                | P                | 135  | 33.25 | K              | 2     | 0.67  |       |
|                | W                | 117  | 28.83 | P              | 141   | 47.47 |       |
| P <sup>3</sup> | W                | 117  | 28.83 | W              | 87    | 29.29 |       |
|                | E                | 10   | 1.35  | WBi            | 1     | 0.34  |       |
|                | G                | 402  | 54.40 | P <sub>3</sub> | E     | 62    | 17.97 |
|                | H                | 80   | 10.83 | G              | 14    | 4.06  |       |
|                | HBi              | 40   | 5.41  | H              | 1     | 0.29  |       |
|                | K                | 38   | 5.14  | K              | 3     | 0.87  |       |
|                | KBi              | 5    | 0.68  | P              | 145   | 42.03 |       |
|                | P                | 143  | 19.35 | T              | 75    | 21.74 |       |
|                | PBi              | 12   | 1.62  | TBi            | 8     | 2.32  |       |
| W              | 9                | 1.22 | W     | 37             | 10.72 |       |       |
| P <sup>4</sup> | W                | 9    | 1.22  | P <sub>4</sub> | E     | 122   | 38.98 |
|                | E                | 24   | 4.53  | G              | 21    | 6.71  |       |
|                | G                | 106  | 20.00 | HBi            | 1     | 0.32  |       |
|                | H                | 70   | 13.21 | K              | 1     | 0.32  |       |
|                | HBi              | 21   | 3.96  | P              | 155   | 49.52 |       |
|                | K                | 31   | 5.85  | T              | 9     | 2.88  |       |
|                | KBi              | 3    | 0.57  | TBi            | 1     | 0.32  |       |
|                | P                | 266  | 50.19 | W              | 3     | 0.96  |       |
|                | PBi              | 4    | 0.75  |                |       |       |       |
| W              | 4                | 0.75 |       |                |       |       |       |
| M <sup>1</sup> | W                | 4    | 0.75  | M <sub>1</sub> | E     | 20    | 2.24  |
|                | E                | 500  | 24.27 | G              | 76    | 8.50  |       |
|                | G                | 266  | 12.91 | H              | 188   | 21.03 |       |
|                | H                | 11   | 0.53  | HBi            | 61    | 6.82  |       |
|                | K                | 49   | 2.38  | K              | 73    | 8.17  |       |
|                | P                | 668  | 32.43 | KBi            | 4     | 0.45  |       |
|                | PBi              | 4    | 0.19  | P              | 437   | 48.88 |       |
|                | W                | 536  | 26.02 | PBi            | 17    | 1.90  |       |
|                | WBi              | 2    | 0.09  | W              | 18    | 2.01  |       |
| M <sup>2</sup> | WBi              | 2    | 0.09  | M <sub>2</sub> | CS    | 33    | 4.54  |
|                | E                | 451  | 28.89 | CSBi           | 1     | 0.14  |       |
|                | G                | 371  | 23.76 | E              | 33    | 4.54  |       |
|                | H                | 9    | 0.58  | G              | 15    | 2.06  |       |
|                | HBi              | 2    | 0.13  | H              | 143   | 19.67 |       |
|                | K                | 80   | 5.12  | HBi            | 17    | 2.34  |       |
|                | KBi              | 1    | 0.06  | K              | 206   | 28.34 |       |
|                | P                | 262  | 16.78 | KBi            | 4     | 0.55  |       |
|                | W                | 241  | 15.43 | P              | 256   | 35.21 |       |
|                |                  |      |       | PBi            | 5     | 0.69  |       |
|                |                  |      | W     | 1              | 0.14  |       |       |
| M <sup>3</sup> | E                | 105  | 12.64 | M <sub>3</sub> | CS    | 6     | 1.07  |

|  |     |     |       |  |     |     |       |
|--|-----|-----|-------|--|-----|-----|-------|
|  | G   | 338 | 40.67 |  | E   | 75  | 13.32 |
|  | H   | 12  | 1.44  |  | G   | 72  | 12.79 |
|  | HBi | 5   | 0.60  |  | H   | 49  | 8.70  |
|  | K   | 41  | 4.93  |  | HBi | 4   | 0.71  |
|  | P   | 115 | 13.84 |  | K   | 182 | 32.33 |
|  | PBi | 5   | 0.60  |  | KBi | 3   | 0.53  |
|  | W   | 103 | 12.39 |  | P   | 155 | 27.53 |
|  |     |     |       |  | PBi | 2   | 0.36  |
|  |     |     |       |  | W   | 4   | 0.71  |

413 \* from Table 3, Bi = bifid. Congenitally absent teeth not included in statistics for this table.

414

415 Pegged (Mi) roots while globular in cross section, are their considered their own  
 416 distinct morphology as they are a form of microdontia [85]. They are relatively rare in our  
 417 sample and only appear in M<sup>3</sup> and M<sub>3</sub> (Table 8).

418

419 Table 8: Type and number of teeth with pegged roots

| Tooth          | External morphology | n | % of roots* | Tooth           | External morphology | n | % of roots* |
|----------------|---------------------|---|-------------|-----------------|---------------------|---|-------------|
| <u>Maxilla</u> |                     |   |             | <u>Mandible</u> |                     |   |             |
| M <sup>3</sup> | Mi                  | 5 | 0.60        | M <sub>3</sub>  | Mi                  | 6 | 1.07        |

420 \* from Table 3

421

422 Fused roots are almost always found in the molars and are more common in the  
 423 maxillary molars (Table 9). In almost all cases fusion includes the mesial (M) root, and it is  
 424 not uncommon for fused roots to have some degree of bifurcation (Bi).

425

426 Table 9: Type and number of roots showing fusion morphologies

| Tooth          | External morphology | n  | % of roots* | Tooth           | External morphology | n  | % of roots* |
|----------------|---------------------|----|-------------|-----------------|---------------------|----|-------------|
| <u>Maxilla</u> |                     |    |             | <u>Mandible</u> |                     |    |             |
| P <sup>4</sup> | MLFBi               | 1  | 0.19        | M <sub>2</sub>  | MDF                 | 13 | 1.79        |
| M <sup>1</sup> | MDF                 | 4  | 0.19        | M <sub>3</sub>  | MDF                 | 5  | 0.89        |
|                | MLF                 | 1  | 0.05        |                 |                     |    |             |
|                | MLFBi               | 3  | 0.15        |                 |                     |    |             |
|                | DLF                 | 8  | 0.39        |                 |                     |    |             |
|                | DLFBi               | 8  | 0.39        |                 |                     |    |             |
| M <sup>2</sup> | BLF                 | 3  | 0.19        |                 |                     |    |             |
|                | DLF                 | 8  | 0.51        |                 |                     |    |             |
|                | DLFBi               | 2  | 0.13        |                 |                     |    |             |
|                | MDF                 | 12 | 0.77        |                 |                     |    |             |
|                | MDFDLF              | 4  | 0.26        |                 |                     |    |             |
|                | MDFMLF              | 2  | 0.13        |                 |                     |    |             |
|                | MDFMLFBi            | 1  | 0.06        |                 |                     |    |             |
|                | MLF                 | 60 | 3.84        |                 |                     |    |             |
|                | MLFBi               | 21 | 1.35        |                 |                     |    |             |

|                |          |    |      |  |  |  |  |
|----------------|----------|----|------|--|--|--|--|
|                | MLFBiDLF | 1  | 0.06 |  |  |  |  |
|                | MLFBiMDF | 1  | 0.06 |  |  |  |  |
|                | MLFDLF   | 23 | 1.47 |  |  |  |  |
|                | MLFDLFBi | 3  | 0.19 |  |  |  |  |
|                | MLFMDF   | 4  | 0.26 |  |  |  |  |
| M <sup>3</sup> | DLF      | 15 | 1.81 |  |  |  |  |
|                | MDF      | 14 | 1.68 |  |  |  |  |
|                | MDFDLF   | 1  | 0.12 |  |  |  |  |
|                | MLF      | 25 | 3.01 |  |  |  |  |
|                | MLFBi    | 8  | 0.96 |  |  |  |  |
|                | MLFBiDLF | 2  | 0.24 |  |  |  |  |
|                | MLFDLF   | 36 | 4.33 |  |  |  |  |
|                | MLFMDF   | 1  | 0.12 |  |  |  |  |

427 \* from Table 3. M = Mesial, B = Buccal, D = Distal, L = Lingual, F = Fused, Bi = bifid apex. Ex: MLF = mesio-lingual  
 428 fused roots, MLFBi = mesio-lingual fused roots with bifurcation. Congenitally absent teeth not included in  
 429 statistics for this table.

430

### 431 Canal shape and configuration

432

433 Single round (R) and ovoid (O) canals are the most common canal morphologies and  
 434 configurations in nearly all teeth of both jaws (Table 10). Interestingly, R canals are most  
 435 prevalent in maxillary teeth while O canals are most prevalent in mandibular teeth. Isthmus  
 436 canals (i2-i5) appear with less frequency than single (R and O) and double-canaled (R2-R5)  
 437 variants and are mostly found in the mandibular molars. The double-canaled R5 orientation  
 438 appears the least. No R3 variants appear in this sample.

439

440 Table 10: Number of canal shapes and configurations in the maxilla and mandible by tooth

| Tooth          | Canal morphology | n~  | % of canalst | Tooth           | Canal morphology | n~   | # of canalst |
|----------------|------------------|-----|--------------|-----------------|------------------|------|--------------|
| <b>Maxilla</b> |                  |     |              | <b>Mandible</b> |                  |      |              |
| I <sup>1</sup> | O                | 22  | 10.78        | I <sub>1</sub>  | O                | 110  | 48.25        |
|                | R                | 182 | 89.22        |                 | R                | 70   | 30.70        |
|                |                  |     |              |                 | R2               | 5    | 4.39         |
|                |                  |     |              |                 | R4               | 18   | 15.79        |
|                |                  |     |              | i2              | 1                | 0.88 |              |
| I <sup>2</sup> | O                | 84  | 33.73        | I <sub>2</sub>  | O                | 140  | 56.68        |
|                | R                | 163 | 65.46        |                 | R                | 68   | 27.54        |
|                | R4               | 1   | 0.80         |                 | R2               | 6    | 2.43         |
|                |                  |     |              |                 | R4               | 31   | 12.55        |
|                |                  |     |              |                 | i2               | 1    | 0.40         |
|                |                  |     |              | i5              | 1                | 0.40 |              |
| C <sup>1</sup> | O                | 227 | 55.77        | C <sub>1</sub>  | O                | 204  | 64.35        |
|                | R                | 178 | 43.74        |                 | R                | 73   | 23.03        |
|                | R5               | 1   | 0.49         |                 | R2               | 1    | 0.63         |
|                |                  |     |              |                 | R4               | 15   | 9.46         |
|                |                  |     |              |                 | R5               | 1    | 0.63         |
|                |                  |     |              | i2              | 3                | 1.89 |              |
| P <sup>3</sup> | O                | 67  | 6.99         | P <sub>3</sub>  | O                | 177  | 40.69        |

|                      |    |       |       |                      |    |     |       |
|----------------------|----|-------|-------|----------------------|----|-----|-------|
|                      | R  | 458   | 47.76 |                      | R  | 84  | 19.31 |
|                      | R2 | 120   | 25.03 |                      | R2 | 21  | 9.66  |
|                      | R4 | 75    | 15.64 |                      | R4 | 1   | 0.46  |
|                      | R5 | 7     | 1.46  |                      | i2 | 2   | 0.92  |
|                      | i2 | 6     | 1.25  |                      | i3 | 1   | 0.46  |
|                      | i5 | 9     | 1.88  |                      | i4 | 2   | 1.38  |
|                      |    |       |       |                      | i5 | 59  | 27.13 |
| <b>P<sup>4</sup></b> | O  | 193   | 27.26 | <b>P<sub>4</sub></b> | O  | 179 | 54.91 |
|                      | R  | 163   | 23.02 |                      | R  | 121 | 37.12 |
|                      | R2 | 70    | 19.77 |                      | R2 | 5   | 3.07  |
|                      | R4 | 90    | 25.42 |                      | R4 | 1   | 0.61  |
|                      | R5 | 3     | 0.85  |                      | i5 | 7   | 4.29  |
|                      | i2 | 11    | 3.11  |                      |    |     |       |
|                      | i5 | 2     | 0.56  |                      |    |     |       |
| <b>M<sup>1</sup></b> | O  | 357   | 14.69 | <b>M<sub>1</sub></b> | O  | 225 | 15.83 |
|                      | R  | 1,379 | 56.75 |                      | R  | 142 | 9.99  |
|                      | R2 | 149   | 12.26 |                      | R2 | 261 | 36.73 |
|                      | R4 | 134   | 11.03 |                      | R4 | 86  | 12.10 |
|                      | R5 | 14    | 1.15  |                      | R5 | 5   | 0.70  |
|                      | i2 | 33    | 2.72  |                      | i2 | 105 | 14.78 |
|                      | i3 | 3     | 0.25  |                      | i3 | 30  | 4.22  |
|                      | i4 | 1     | 0.08  |                      | i4 | 10  | 1.41  |
|                      | i5 | 13    | 1.07  |                      | i5 | 30  | 4.22  |
| <b>M<sup>2</sup></b> | O  | 284   | 14.87 | <b>M<sub>2</sub></b> | O  | 295 | 26.66 |
|                      | R  | 1,245 | 65.18 |                      | R  | 90  | 8.13  |
|                      | R2 | 53    | 5.55  |                      | R2 | 139 | 25.11 |
|                      | R4 | 69    | 7.23  |                      | R4 | 99  | 17.89 |
|                      | R5 | 4     | 0.42  |                      | R5 | 2   | 0.36  |
|                      | i2 | 45    | 4.71  |                      | i2 | 68  | 12.29 |
|                      | i3 | 7     | 0.73  |                      | i3 | 22  | 3.97  |
|                      | i4 | 1     | 0.16  |                      | i4 | 12  | 3.25  |
|                      | i5 | 11    | 1.15  |                      | i5 | 13  | 2.35  |
| <b>M<sup>3</sup></b> | O  | 120   | 11.27 | <b>M<sub>3</sub></b> | O  | 202 | 27.01 |
|                      | R  | 740   | 69.48 |                      | R  | 185 | 24.73 |
|                      | R2 | 44    | 8.26  |                      | R2 | 58  | 15.51 |
|                      | R4 | 25    | 4.69  |                      | R4 | 72  | 19.25 |
|                      | i2 | 21    | 3.94  |                      | i2 | 31  | 8.29  |
|                      | i3 | 3     | 0.56  |                      | i3 | 5   | 1.34  |
|                      | i4 | 1     | 0.28  |                      | i4 | 1   | 0.40  |
|                      | i5 | 8     | 1.50  |                      | i5 | 13  | 3.48  |

441 ~ n column list times each variant appears. However, R2, R4, R5, and i2-i5 are two-canaled variants and are  
 442 counted twice to calculate % of canals. † = Table 4. Congenitally absent teeth not included in statistics for this  
 443 table.

444

## 445 **Classification system**

446

447 As discussed in the literature review above, the categorization of roots and canals  
 448 can be misleading or inaccurate when systems limited to tooth/canal type are applied to  
 449 other root/canal types. Problematically, classification scheme exists that captures all  
 450 components of the complete tooth root phenotype. We have presented here a new system  
 451 that is simple, accurate, human and computer readable, and allows for easy qualitative

452 and/or quantitative analysis of the entire phenotype, or each of its constituent parts,  
453 individually or in any combination. We have outlined five phenotypic elements (E) that  
454 comprise the human tooth root phenotype: E1 - root number, E2 - canal number, E3 – canal  
455 location, E4 - external morphology, and E5 – canal morphology and configuration. The  
456 system provides codes for each element, and the resulting combination constitutes that  
457 root complex's complete phenotype code.

458

### 459 **Tooth name or number**

460 Our system works with categorical and numbering systems including, but not limited  
461 to, the Palmer Notation Numbering system, the FDI World Dental Federation System, simple  
462 abbreviations such as UP4 (upper 2<sup>nd</sup> premolar) or LM1 (lower first molar), or the super- and  
463 subscript formulas described in and used throughout this study.

464

### 465 **Root number or absence**

466 Roots are recorded by simple counts and represented with an R. For example, a two-  
467 rooted tooth would be coded as R2. Root number is determined using the Turner index [1]  
468 as outlined in the methods section. In the case of congenitally absent teeth and roots we  
469 use CON, rather than 0 or NA. This is because congenital absence of a tooth is a heritable  
470 phenotypic trait, with different population frequencies [86,87]. In the case of missing teeth,  
471 root number can often be recorded by counting the alveolar sockets. Fig 13 presents a  
472 workflow for recording E1 and its variants.

473

474 Fig 13. **Flow chart for determining and recording phenotype element 1 - root number or**  
475 **absence.**

476

### 477 **Canal number**

478 Like root number, canal number is a simple count but represented with a C rather  
479 than an R. As discussed in the methods section, we apply the Turner index (1991),  
480 essentially a system of thirds, to determine counts. Building the above example, a two  
481 rooted, three canaled tooth would be coded as R2-C3. Fig 14 presents a workflow for  
482 recording E2 and its variants.

483

484 Fig 14. **Flow chart for determining and recording phenotype element 2 - canal number.**

485

### 486 **Anatomical locations of canals**

487 The locations of the canals in the root complex are easily recorded following the  
488 anatomical directions common to any dental anatomy textbook and discussed above. Fig 15  
489 presents a workflow for recording E3 and its variants. Labeling order begins with mesial (M),  
490 followed by buccal (B), distal (D), and lingual (L), inclusive of intermediate locations (e.g.,  
491 mesio-distal). Continuing the above example, if two canals are found in the mesial root and  
492 one in the distal root, the root complex would be coded as R2-C3-M2D1.

493

494 Fig 15. **Flow chart for determining and recording phenotype element 3 - anatomical**  
495 **location of canals.** Bottom left: Axial CT scan slice of right maxillary dental arcade.  
496 Anatomical directions: A = axial, M = mesial, MB = mesio-buccal, B = buccal, BD = bucco-  
497 distal, D = distal, DL = disto-lingual, L = lingual, ML = mesio-lingual, F = fused.

498

### 499 **External Root Morphology**

500 Fig 12 and Table 6 visualize and describe external root morphologies recorded at the  
501 midpoint of the root, while Fig 16 presents a workflow for recording E4 and its variants.  
502 Fused roots also fall under E4. However, unlike the morphologies described in Table 6 and  
503 Fig 12, fused roots are simply recorded with F (for fused) appended to the anatomical  
504 locations of the fused roots. For example a mesial and buccal fused root, would be recorded  
505 as MBF. Though we have used axial slices to determine these morphologies, they can be  
506 ascertained visually from extracted teeth, and occasionally the alveolar sockets of missing  
507 teeth [2]. A tooth with two roots, containing three canals – two in the mesial root and one  
508 in the distal root, with an hourglass and plate shaped mesial and distal roots, is coded as:  
509 R2-C3-M2D1-MHDP.

510

511 Fig 16. **Flow chart for determining and recording phenotype element 4 - external root**  
512 **morphology.**

513 \*if root is bifurcated, append morphology with Bi. Ex: P = plate, PBi = plate-bifurcated. Right:  
514 axial CT slices showing external root morphologies.

515

516

## 517 **Canal configuration**

518

519 **Fig 17. Flow chart for determining and recording phenotype element 5 - canal morphology**  
520 **and configuration.** Right: sagittal CT slices showing canal morphologies. \*Because the R3  
521 variant does not appear in this sample, the sagittal slice is represented by an illustration.

522

523 Root canal configuration requires visualization of the canal system from the CEJ to  
524 the foramen/foramina. While  $\mu$ CT or CBCT provide the greatest resolution for visualising  
525 these structures, in certain cases 2D radiography is sufficient (see Versiani et al., 2018 for an  
526 indepth discussion and comparison of techniques). Our simplified system (Figs 10 & 11) will  
527 help the user to classify accurately canal configurations as it is based on a system of thirds,  
528 rather than harder to visualize 'types'.

529

530 **Fig 18. Flow chart for determining and recording phenotype element 5 - canal morphology**  
531 **and configuration (isthmus canals).** Illustrations show external root morphologies including  
532 C-shaped root variants. Canal shape/configuration is in gray.

533

534 Figs 17 and 18 present a workflow for recording E5 and its variants. Finalizing the  
535 above example - two round canals in the mesial root and one ovoid canal in the distal root  
536 can easily be coded as MR2DO; completing the root complex phenotype code as: R2-C3-  
537 M2D1-MHDP-MR2DO (Fig 19).

538

539

540 **Fig 19. Five phenotypic elements of a lower left 1st mandibular molar (RM<sub>1</sub>-R2-C3-M2D1-**  
541 **MHDP-MR2DO).** A. E1 - Root presence/absence; B. E2 - Canal presence/absence, C. E3 -  
542 Canal location, D. E4 - Canal morphology, E. E5 - Canal shape. Images A and B from the Root  
543 Canal Anatomy Project <https://rootcanalanatomy.blogspot.com/> (accessed 10 March 2021)

544

545

546

## 547 **Redundancy of information**

548

549 There is a bit of redundancy of information in our system. For example, R2-C3-  
550 M2D1-MHDP-MR2DO can be shortened to MHR2-DPO without loss of information. MHR2  
551 describes a mesial (M) root (1 root) that is hourglass (H) shaped with two round (R2) canals  
552 (C), while DPO describes a distal (D) root (1 root) that is plate (P) shaped, with one ovoid (O)  
553 canal (C). However, there are several issues with this shorter version. The first is that we  
554 designed to our system to record phenotype elements individually or in combination. MHR2



555 describes what is potentially a single rooted tooth or could be a four rooted tooth. R2  
556 indicates that the root complex is two-rooted, as does M2D1, MHDP, and/or MR2DO. The  
557 second is human and computer readability. For a human, R2-C3-M2D1-MHDP-MR2DO is  
558 easier to read and understand than MHR2-DPO. For a computer, R2-C3-M2D1-MHDP-  
559 MR2DO allows easy separation and/or recombination of elements for analysis. The third is  
560 that not all users will have visual access to all elements within a root complex. It might be  
561 lack of equipment (radiography) or missing teeth. Thus, our system is also designed to  
562 capture the most information available to the user, missing information can be easily  
563 represented. Although there is a level of redundancy, the system is optimized for human  
564 and machine reading.

## 565 **The phenotypic set within the morphospace of root diversity**

566  
567 Within these phenotypic elements, there is exist 841 unique phenotype element  
568 permutations derived from our global sample. These comprise our study's "phenotypic set"  
569 among the range of potential phenotypic permutations. Anterior teeth have the least  
570 number of permutations while molars, particularly maxillary molars, have the greatest (Fig.  
571 20).

572  
573 Fig 20. **Number of phenotypes in individual teeth.**

574

## 575 **Discussion**

576  
577 This paper set out to present a method that would capture quantitatively and  
578 qualitatively the diversity of human tooth root phenotypes, using a modular approach. It has  
579 shown that it is possible to have a universal code for phenotyping roots, and that a global  
580 sample of modern humans demonstrates the high level of tooth root phenotype diversity. A  
581 more comprehensive set of tooth root data should reinforce and expand the broader toolset  
582 for studying human phenotypic diversity (e.g., tooth crowns, craniofacial morphometrics,  
583 genetics, etc.).

584 The large number of phenotypes permutations found in our sample can be explained  
585 by the variation within each element. For example, Table 10 shows how permutations in  
586 one element can result in four nearly identical tooth roots with four different phenotype  
587 codes. Here, all these roots are identical in their phenotypic elements with the exception of

588 their external morphology (E4). Teeth with more roots result in a greater number of  
589 permutations. Fig 21 illustrates how increasing numbers and multiple combinations, and  
590 orientations of root morphologies create the morphological permutations of the external  
591 phenotypic elements. However, compared to tooth crowns, the number of phenotype  
592 permutations is relatively few, as a recent test of ASUDAS crown traits indicates greater  
593 than 1.4 million combinations, or permutations of crown phenotypes [88].

594

595 Table 10: Changing one element results in phenotype permutations in single-rooted teeth.

| E1 | E2 | E3 | E4 | E5 | Code        |
|----|----|----|----|----|-------------|
| R1 | C1 | A  | P  | O  | R1-C1-A-P-O |
| R1 | C1 | A  | E  | O  | R1-C1-A-E-O |
| R1 | C1 | A  | W  | O  | R1-C1-A-W-O |
| R1 | C1 | A  | K  | O  | R1-C1-A-K-O |

596

597

598

599 Fig 21. **Variation in the tooth root complex.** Left - Combinations of individual root types  
600 form multiple root complexes (e.g., C3 = one tooth with two plate shaped roots). Right -  
601 multiple root forms can appear in the tooth row. The left panel shows the range of possible  
602 combinations, while the right provides an example.

603

604 We would emphasize two elements of the approach. The first is the expansion of  
605 data available and the use of a universal and modular system. Scanning technologies have  
606 provided greater access to tissues, such as tooth roots, that were previously difficult to  
607 access for visual inspection, thus, permitting a much fuller and complete description of  
608 these morphologies. The system we have developed is designed to be comprehensive and  
609 universal, so that any tooth can be placed within the set of attributes. The five phenotypic  
610 elements - root presence/absence (E1), canal root presence/absence (E2), canal location  
611 (E3), external root morphology (E4), and canal morphology and configuration (E5), allow for  
612 independent categorization, so that phenotypes can be put together combinatorically, or  
613 treated as individual components – for example, using just external root morphology.  
614 Although constructed for recent human variation, we have shown through preliminary case  
615 studies that the system can be extended across extant and fossil hominids, providing an  
616 additional tool for reconstructing evolutionary history, as well be used to map geographical  
617 patterns among contemporary human populations. Its broader applicability will be  
618 dependent upon an expansion in the number of scans available; while this is increasingly the

619 case for fossil hominins, more regular scanning of more recent samples will be essential for  
620 studies of human diversity.

621 The advantages of this system, in addition to its universality, is that it allows for  
622 relatively simple qualitative and quantitative analysis. This is important, as there is  
623 increasing interest in mapping human diversity in different ways, using quantitative  
624 techniques [89–91]; the abundance of dental remains provides an additional source of  
625 information. In addition, there is growing interest among geneticists to map phenotypic  
626 variation against genetic variation [92], and to develop a better understanding of genotype-  
627 phenotype relationships. As teeth are generally to be considered strongly influenced by  
628 their genetic components [93,94], they are an ideal system for testing these relationships. It  
629 may be the case that different phenotypes behave differently across populations, and so  
630 tooth roots can become part of phenotype-genotype comparisons. Such comparisons can be  
631 either phenetic, or phylogenetic, as the coding system is entirely suitable for cladistic  
632 analysis.

633 The second element relates to morphospace, an increasingly utilized concept in  
634 evolutionary biology [95,96]. The morphospace is the total available forms that a phenotype  
635 can take, limited by physical or biological properties. Evolution is, in a sense, following paths  
636 in morphospace [97]. The phenotypic set is that part of the morphospace that is actually  
637 occupied. The method proposed here has explored the available morphospace for human  
638 tooth roots and has provided a series of elements that describe it. There are a very large  
639 number of possible phenotypes under this system (in principle, the total number is  
640 combinatorial product of the five phenotypic elements and their potential states, although  
641 in practice the number would be much smaller due to functional and physical constraints),  
642 but we have shown here that in a relatively large sample there are about 841 observable  
643 individual tooth phenotypes – in other words a small proportion of possible ones. What is  
644 critical here is that the proposed method allows the realized and potential phenotypic sets  
645 of dental roots to be determined and analysed in potential evolutionary, developmental and  
646 functional contexts.

647 Finally, for the method to be worthwhile, it is necessary for it to be useful in relation  
648 to current hypotheses and research foci. Four are immediately apparent. First, current  
649 interest in the role of dispersals, not just the initial one from Africa [98–100], but also the  
650 increasing genetic evidence for multiple later regional dispersals means that finding ways of

651 linking the palaeoanthropological and archaeological record to the inferred genotypes  
652 requires diverse phenotypes, and methods such as this will be required [101–104]. The  
653 second is in terms of earlier phases of human evolution; with the current evidence for  
654 interbreeding across hominin taxa [105], it is necessary to have appropriate phenotypic  
655 systems – and roots are likely to be a good one – to tease out the phenotypic effects in such  
656 admixture [106,107]. Third, there is considerable interest in modularity and integration in  
657 evolution, and the modular approach adopted here may provide a suitable model system  
658 for exploring these issues [108,109]. And finally, biomechanical and spatial studies of the  
659 hominid masticatory system can draw quantitative functional and dietary inferences from  
660 root and canal number and morphology [110–113].

661

## 662 **Conclusions**

663

664 Compared to tooth crowns, tooth roots have received little attention in evolutionary  
665 studies. Novel technologies have increased the potential for exploiting variation in root  
666 morphology, and thus increased their importance as phenotypes. This paper presents a  
667 novel method for defining and analysing the morphospace of the human tooth-root  
668 complex. The five phenotypic elements of the system root presence/absence (E1), canal  
669 root presence/absence (E2), canal location (E3), external root morphology (E4), and canal  
670 morphology and configuration (E5), were designed to: 1) identify the elements that best  
671 describe variation in root and canal anatomy, 2) create a typology that is modular in nature  
672 and can be appended for undocumented morphotypes, and 3) is applicable to hominoids.  
673 The system will provide a basis for future research in human evolution, human genotype-  
674 phenotype investigations, and the functional biology of the human masticatory system.

675

## 676 **Acknowledgements**

677 We would like to thank Drs. Marta Mirazón-Lahr, Francis Rivera, and Lynn Copes for access  
678 to, and permission to use their CT scan collections.

679

## 680 **References**

681

- 682 1. Turner II CG, Nichol CR, Scott GR. Scoring procedures for key morphological traits of  
683 the permanent dentition : the Arizona State University dental anthropology system.

- 684 Adv Dent Anthropol. 1991; 13–31.
- 685 2. Scott GR, Turner II CG, Townsend GC, Martínón-Torres M. The anthropology of  
686 modern human teeth: Dental morphology and its variation in recent and fossil homo  
687 sapiens: Second edition. *The Anthropology of Modern Human Teeth: Dental  
688 Morphology and its Variation in Recent and Fossil Homo Sapien*. 2018.  
689 doi:10.1017/9781316795859
- 690 3. Kirilova J, Topalova-Pirinska S, Kirov D. Variation of maxillary first premolar with three  
691 root canals. *J IMAB - Annu Proceeding (Scientific Pap*. 2014;20: 584–588.  
692 doi:10.5272/jimab.2014203.584
- 693 4. Vertucci FJ, Gegauff A. Root canal morphology of the maxillary first premolar. *J Am  
694 Dent Assoc*. 1979;99: 194–198. doi:10.14219/jada.archive.1979.0255
- 695 5. Cleghorn BM, Christie WH, Dong CCS. Root and Root Canal Morphology of the Human  
696 Permanent Maxillary First Molar: A Literature Review. *J Endod*. 2006;32: 813–821.  
697 doi:10.1016/j.joen.2006.04.014
- 698 6. Taylor AB. Feeding behavior, diet, and the functional consequences of jaw form in  
699 orangutans, with implications for the evolution of Pongo. *J Hum Evol*. 2006;50: 377–  
700 393. doi:10.1016/j.jhevol.2005.10.006
- 701 7. Roy A, Velmurugan N, Suresh N. Mandibular second molar with a single root and a  
702 single canal: Case series. *J Clin Diagnostic Res*. 2013;7: 2637–2638.  
703 doi:10.7860/JCDR/2013/6172.3635
- 704 8. Fernandes M, De Ataíde I, Wagle R. C-shaped root canal configuration: A review of  
705 literature. *J Conserv Dent*. 2014;17: 312–319. doi:10.4103/0972-0707.136437
- 706 9. Tomes CS. *A Manual of Dental Anatomy: Human and Comparative*. London: J. & A.  
707 Churchill; 1889.
- 708 10. Keith A. Problems Relating to the Teeth of the Earlier Forms of Prehistoric Man. *J R  
709 Soc Med*. 1913;6: 103–124. doi:10.1177/003591571300601018
- 710 11. Fan B, Cheung GSP, Fan M, Gutmann JL, Bian Z. C-shaped canal system in mandibular  
711 second molars: Part I - Anatomical features. *J Endod*. 2004;30: 899–903.  
712 doi:10.1097/01.don.0000136207.12204.e4
- 713 12. Taylor AE. Variations in the human tooth-form as met with in isolated teeth. *J Anat  
714 Physiol*. 1899; 268–271.
- 715 13. Black GV. *Descriptive anatomy of the human teeth*. S.S. White Dental Manufacturing  
716 Company, Philadelphia; 1902.
- 717 14. Miyabara T. An anthropological study of the masticatory system in the Japanese the  
718 teeth. *Dent Cosm*. 1994;58: 739–749.
- 719 15. Campbell TD. *Dentition and palate of the Australian aboriginal*. University of Adelaide  
720 Publications under the Keith Sheridan Foundation. Adelaide: Hassell Press; 1925.
- 721 16. Drennan MR. The dentition of a Bushman tribe. *Ann South African Museum*. 1929;  
722 61–88.
- 723 17. Shaw J. *The teeth, the bony palate and the mandible in Bantu races of South Africa*,  
724 London: John Bale Sons & Danielsson; 1931.
- 725 18. Nelson CT. The teeth of the Indians of Pecos Pueblo. *Am J Phys Anthropol*. 1938; 261–  
726 293.
- 727 19. Tratman EK. Three- rooted lower molars in man and their racial distribution. *Br Dent  
728 J*. 1938; 264–274.
- 729 20. Abrahams LC. The masticatory apparatus of the people of Calvinia and Namaqualand  
730 in the North Western Cape of the Union of South Africa. *J Dent Assoc South Africa*.

- 731 1947;1: 5–51.
- 732 21. Selmer-Olsen R. An odontometrical study on the Norwegian Lapps. undefined. Det  
733 Norske Videnskaps Akademi, Oslo; 1949.
- 734 22. Pedersen PO. The East Greenland Eskimo dentition, numerical variations and  
735 anatomy : a contribution to comparative ethnic odontography. Meddelelser om  
736 Grønl. 1949;142: 1–244.
- 737 23. Moorrees CFA. The Aleut dentition. Cambridge: Harvard University Press; 1957.
- 738 24. Brabant HE. Observations sur revolution de la denture permanente humaine en  
739 Europe Occidentale. Bull du Group Int pour la Rech Sci en Stomatol Odontol. 1964;  
740 11–84.
- 741 25. Moss ML, Chase PS, Howes RI. Comparative odontometry of the permanent  
742 post-canine dentition of American Whites and Negroes. Am J Phys Anthropol.  
743 1967;27: 125–142. doi:10.1002/ajpa.1330270204
- 744 26. Barnes DS. Tooth morphology and other aspects of the Teso dentition. Am J Phys  
745 Anthropol. 1969;30: 183–193. doi:10.1002/ajpa.1330300204
- 746 27. Caliřkan MK, Pehlivan Y, Sepetçiođlu F, Türkün M, Tuncer SS. Root canal morphology  
747 of human permanent teeth in a Turkish population. J Endod. 1995;21: 200–4.  
748 doi:10.1016/S0099-2399(06)80566-2
- 749 28. Carns EJ, Skidmore AE. Configurations and deviations of root canals of maxillary first  
750 premolars. Oral Surgery, Oral Med Oral Pathol. 1973;36: 880–886. doi:10.1016/0030-  
751 4220(73)90340-X
- 752 29. Barker BCW, Parsons KC, Mills PR, Williams GL. Anatomy of root canals. III. permanent  
753 mandibular molars. Aust Dent J. 1974;19: 408–413. doi:10.1111/j.1834-  
754 7819.1974.tb02372.x
- 755 30. Fathi Z, Rahimi S, Tavakoli R, Amini M. A Three-rooted Mandibular Second Premolar:  
756 A Case Report. J Dent Res Dent Clin Dent Prospects. 2014;8: 184–186.  
757 doi:10.5681/joddd.2014.034
- 758 31. Kakkar P, Singh A. Mandibular first premolar with three roots: a case report. Iran  
759 Endod J. 2012;7: 207–10. Available: <http://www.ncbi.nlm.nih.gov/pubmed/23130081>
- 760 32. Christie WH, Peikoff MD, Fogel HM. Maxillary molars with two palatal roots: A  
761 retrospective clinical study. J Endod. 1991;17: 80–84. doi:10.1016/S0099-  
762 2399(06)81613-4
- 763 33. Ahmed H, Abbott P. Accessory roots in maxillary molar teeth: a review and  
764 endodontic considerations. Aust Dent J. 2012;57: 123–131. doi:10.1111/j.1834-  
765 7819.2012.01678.x
- 766 34. Fahid A, Taintor JF. Maxillary second molar with three buccal roots. J Endod. 1988;14:  
767 181–183. doi:10.1016/S0099-2399(88)80261-9
- 768 35. Scott GR, Turner II CG. The anthropology of modern human teeth: Dental morphology  
769 and its variation in recent human populations. The Anthropology of Modern Human  
770 Teeth: Dental Morphology and its Variation in Recent Human Populations. Cambridge  
771 University Press; 2015. doi:10.1017/CBO9781316529843
- 772 36. Calberson FL, De Moor RJ, Deroose CA. The Radix Entomolaris and Paramolaris:  
773 Clinical Approach in Endodontics. J Endod. 2007;33: 58–63.  
774 doi:10.1016/j.joen.2006.05.007
- 775 37. Turner II CG. Three-rooted mandibular first permanent molars and the question of  
776 American Indian Origins. Am J Phys Anthropol. 1971;34: 229–241.  
777 doi:10.1002/ajpa.1330340207

- 778 38. De Pablo ÓV, Estevez R, Péix Sánchez M, Heilborn C, Cohenca N. Root anatomy and  
779 canal configuration of the permanent mandibular first molar: A systematic review.  
780 *Journal of Endodontics*. 2010. pp. 1919–1931. doi:10.1016/j.joen.2010.08.055
- 781 39. Bailey SE, Hublin JJ, Antón SC. Rare dental trait provides morphological evidence of  
782 archaic introgression in Asian fossil record. *Proc Natl Acad Sci U S A*. 2019;116:  
783 14806–14807. doi:10.1073/pnas.1907557116
- 784 40. Richard Scott G, Irish JD, Martínón-Torres MM, Scott GR, Irish JD, Martínón M, et al. A  
785 more comprehensive view of the Denisovan 3-rooted lower second molar from Xiahe.  
786 *Proc Natl Acad Sci U S A*. 2020;117: 37–38. doi:10.1073/pnas.1918004116
- 787 41. Zheng Q, Zhang L, Zhou X, Wang Q, Wang Y, Tang L, et al. C-shaped root canal system  
788 in mandibular second molars in a Chinese population evaluated by cone-beam  
789 computed tomography. *Int Endod J*. 2011;44: 857–862. doi:10.1111/j.1365-  
790 2591.2011.01896.x
- 791 42. Stringer CB, Humphrey LT, Compton T. Cladistic analysis of dental traits in recent  
792 humans using a fossil outgroup. *J Hum Evol*. 1997;32: 389–402.  
793 doi:10.1006/jhev.1996.0112
- 794 43. Al-Ani AH, Antoun JS, Thomson WM, Merriman TR, Farella M. Hypodontia: An Update  
795 on Its Etiology, Classification, and Clinical Management. *BioMed Research*  
796 *International*. Hindawi; 2017. pp. 1–9. doi:10.1155/2017/9378325
- 797 44. Ahmed HMA, Hashem AA. Accessory roots and root canals in human anterior teeth: a  
798 review and clinical considerations. *Int Endod J*. 2016;49: 724–736.  
799 doi:10.1111/iej.12508
- 800 45. Alexandersen V. Double-rooted human lower canine teeth. *Dental Anthropology*.  
801 Elsevier; 1963. pp. 235–244. doi:10.1016/b978-0-08-009823-4.50017-3
- 802 46. Lee C, Scott GR. Brief communication: Two-rooted lower Canines-A European trait  
803 and sensitive indicator of admixture across Eurasia. *Am J Phys Anthropol*. 2011;146:  
804 481–485. doi:10.1002/ajpa.21585
- 805 47. Kullmer O, Sandrock O, Kupczik K, Frost SR, Volpato V, Bromage TG, et al. New  
806 primate remains from Mwenirondo, Chiwondo Beds in northern Malawi. *J Hum Evol*.  
807 2011;61: 617–623. doi:10.1016/j.jhevol.2011.07.003
- 808 48. Kupczik K, Delezene LK, Skinner MM. Mandibular molar root and pulp cavity  
809 morphology in *Homo naledi* and other Plio-Pleistocene hominins. *J Hum Evol*.  
810 2019;130: 83–95. doi:10.1016/j.jhevol.2019.03.007
- 811 49. Robinson JT. The dentition of the Australopithecinae: Australopithecines and hominid  
812 phylogenesis. *Transvaal Museum Mem*. 1956;9: 158–175. Available:  
813 [http://journals.co.za/content/transmem/9/1/AJA0000012\\_159](http://journals.co.za/content/transmem/9/1/AJA0000012_159)
- 814 50. Wood BA, Abbott SA, Uytterschaut H. Analysis of the dental morphology of Plio-  
815 Pleistocene hominids. IV. Mandibular postcanine root morphology. *J Anat*. 1988;156:  
816 107. Available: /pmc/articles/PMC1261917/?report=abstract
- 817 51. Ward SC, Johanson DC, Coppens Y. Subocclusal morphology and alveolar process  
818 relationships of hominid gnathic elements from the Hadar formation: 1974–1977  
819 collections. *Am J Phys Anthropol*. 1982;57: 605–630. doi:10.1002/ajpa.1330570407
- 820 52. Wood BA, Abbott SA, Uytterschaut H. Analysis of the dental morphology of Plio-  
821 Pleistocene hominids. IV. Mandibular postcanine root morphology. *J Anat*. 1988;156:  
822 107–39. Available: <http://www.ncbi.nlm.nih.gov/pubmed/3047096>
- 823 53. Shields ED. Mandibular premolar and second molar root morphological variation in  
824 modern humans: What root number can tell us about tooth morphogenesis. *Am J*

- 825 Phys Anthropol. 2005;128: 299–311. doi:10.1002/ajpa.20110  
826 54. Wright T. The molecular control of and clinical variations in root formation. Cells  
827 Tissues Organs. 2007;186: 86–93. doi:10.1159/000102684  
828 55. Versiani MA, Basrani B, Sousa-Neto MD. The root canal anatomy in permanent  
829 dentition. Versiani MA, Basrani B, Sousa-Neto MD, editors. The Root Canal Anatomy  
830 in Permanent Dentition. Cham: Springer International Publishing; 2018.  
831 doi:10.1007/978-3-319-73444-6  
832 56. Vertucci F, Seelig A, Gillis R. Root canal morphology of the human maxillary second  
833 premolar. Oral Surgery, Oral Med Oral Pathol. 1974;38: 456–464. doi:10.1016/0030-  
834 4220(74)90374-0  
835 57. Ahmed HMAA, Versiani MA, De-Deus G, Dummer PMHH. A new system for classifying  
836 root and root canal morphology. Int Endod J. 2017;50: 761–770.  
837 doi:10.1111/iej.12685  
838 58. Hsu YY, Kim S. The resected root surface. The issue of canal isthmuses. Dent Clin  
839 North Am. 1997;41: 529–540. Available:  
840 <http://www.ncbi.nlm.nih.gov/pubmed/9248689>  
841 59. Emonet EG, Tafforeau P, Chaimanee Y, Guy F, de Bonis L, Koufos G, et al. Three-  
842 dimensional analysis of mandibular dental root morphology in hominoids. J Hum Evol.  
843 2012;62: 146–154. doi:10.1016/j.jhevol.2011.11.011  
844 60. Prado-Simón L, Martín-Torres M, Baca P, Olejniczak AJ, Gómez-Robles A, Lapresa  
845 M, et al. Three-dimensional evaluation of root canal morphology in lower second  
846 premolars of early and middle pleistocene human populations from atapuerca  
847 (Burgos, Spain). Am J Phys Anthropol. 2012;147: 452–461. doi:10.1002/ajpa.22015  
848 61. Moore NC, Skinner MM, Hublin JJ. Premolar root morphology and metric variation in  
849 Pan troglodytes verus. Am J Phys Anthropol. 2013;150: 632–646.  
850 doi:10.1002/ajpa.22239  
851 62. Moore NC, Hublin JJ, Skinner MM. Premolar root and canal variation in extant non-  
852 human hominoidea. Am J Phys Anthropol. 2015;158: 209–226.  
853 doi:10.1002/ajpa.22776  
854 63. Wood BA, Abbott SA, Uytterschaut H. Analysis of the dental morphology of Plio-  
855 Pleistocene hominids. IV. Mandibular postcanine root morphology. J Anat. 1988;156:  
856 107–39. Available: /pmc/articles/PMC1261917/?report=abstract  
857 64. Moore CN, Thackeray JF, Hublin JJ, Skinner MM. Premolar root and canal variation in  
858 South African Plio-Pleistocene specimens attributed to Australopithecus africanus and  
859 Paranthropus robustus. J Hum Evol. 2016;93: 46–62.  
860 doi:10.1016/j.jhevol.2015.12.002  
861 65. Cooke HG, Cox FL, Pineda F, Kutler Y, Wakai W. C-shaped canal configurations in  
862 mandibular molars. J Am Dent Assoc. 1979;99: 836–9.  
863 doi:10.14219/JADA.ARCHIVE.1979.0402  
864 66. Fan B, Cheung GSP, Fan M, Gutmann JL, Fan W. C-shaped canal system in mandibular  
865 second molars: Part II - Radiographic features. J Endod. 2004;30: 904–908.  
866 doi:10.1097/01.don.0000136206.73115.93  
867 67. Velmurugan N, Sandhya R. Root canal morphology of mandibular first premolars in an  
868 Indian population: A laboratory study. Int Endod J. 2009;42: 54–58.  
869 doi:10.1111/j.1365-2591.2008.01494.x  
870 68. Ballullaya S V., Vemuri S, Kumar PR. Variable permanent mandibular first molar:  
871 Review of literature. Journal of Conservative Dentistry. 2013. pp. 99–110.



- 872 doi:10.4103/0972-0707.108176
- 873 69. Pomeranz HH, Eidelman DL, Goldberg MG. Treatment considerations of the middle  
874 mesial canal of mandibular first and second molars. *J Endod.* 1981;7: 565–568.  
875 doi:10.1016/S0099-2399(81)80216-6
- 876 70. Kottoor J, Albuquerque DV, Velmurugan N. A new anatomically based nomenclature  
877 for the roots and root canals - Part 1: Maxillary molars. *Int J Dent.* 2012;2012.  
878 doi:10.1155/2012/120565
- 879 71. Valerian Albuquerque D, Kottoor J, Velmurugan N. A new anatomically based  
880 nomenclature for the roots and root canals-part 2: Mandibular molars. *Int J Dent.*  
881 2012;2012. doi:10.1155/2012/814789
- 882 72. Ackerman JL, Ackerman AL, Ackerman AB. Taurodont, pyramidal and fused molar  
883 roots associated with other anomalies in a kindred. *Am J Phys Anthropol.* 1973;38:  
884 681–694. doi:10.1002/ajpa.1330380305
- 885 73. Abbott SA. A comparative study of tooth root morphology in the great apes, modern  
886 man and early hominids. University of London. 1984.
- 887 74. Carlsen O, Alexandersen V. Radix paramolaris in permanent mandibular molars:  
888 identification and morphology. *Eur J Oral Sci.* 1991;99: 189–195. doi:10.1111/j.1600-  
889 0722.1991.tb01884.x
- 890 75. Gu L, Wei X, Ling J, Huang X. A Microcomputed Tomographic Study of Canal Isthmuses  
891 in the Mesial Root of Mandibular First Molars in a Chinese Population. *J Endod.*  
892 2009;35: 353–356. doi:10.1016/j.joen.2008.11.029
- 893 76. Copes LE. Comparative and Experimental Investigations of Cranial Robusticity in Mid-  
894 Pleistocene Hominins. , Arizona State University. 2012.
- 895 77. Rivera F, Mirazón Lahr M. New evidence suggesting a dissociated etiology for cribra  
896 orbitalia and porotic hyperostosis. *Am J Phys Anthropol.* 2017;164: 76–96.  
897 doi:10.1002/ajpa.23258
- 898 78. <https://www.horosproject.org>. Horos Dicom Viewer. Annapolis, USA: Nimble Co LLC  
899 d/b/a Purview; 2016. Available: <https://www.horosproject.org>
- 900 79. Nanci A. Ten Cate's oral histology, 8th edition. *BDJ.* 2012. doi:10.1038/sj.bdj.2012.772
- 901 80. Kovacs I. A Systematic Description of Dental Roots. *Dental Morphology and Evolution.*  
902 1971. pp. 211–256.
- 903 81. Novacek MJ. The Primitive Eutherian Dental Formula. *Source J Vertebr Paleontol.*  
904 1986.
- 905 82. White TD, Black MT, Folkens PA, White TD, Black MT, Folkens PA. Teeth. *Human*  
906 *Osteology.* Academic Press; 2012. pp. 101–128. doi:10.1016/B978-0-12-374134-  
907 9.50005-2
- 908 83. Nelson SJ, Ash MM. Wheeler's dental anatomy, physiology, and occlusion.  
909 Saunders/Elsevier; 2010.
- 910 84. Gu Y, Tang Y, Zhu Q, Feng X. Measurement of root surface area of permanent teeth  
911 with root variations in a Chinese population - A micro-CT analysis. *Arch Oral Biol.*  
912 2016;63: 75–81. doi:10.1016/j.archoralbio.2015.12.001
- 913 85. Daito M, Tanaka T, Hieda T. Clinical observations on the development of third molars.  
914 *J Osaka Dent Univ.* 1992;26: 91–104. doi:10.18905/jodu.26.2\_91
- 915 86. McKeown HF, Robinson DL, Elcock C, Al-Sharood M, Brook AH. Tooth dimensions in  
916 hypodontia patients, their unaffected relatives and a control group measured by a  
917 new image analysis system. *Eur J Orthod.* 2002;24: 131–141.  
918 doi:10.1093/ejo/24.2.131

- 919 87. Rakhshan V. Congenitally missing teeth (hypodontia): A review of the literature  
920 concerning the etiology, prevalence, risk factors, patterns and treatment. *Dent Res J*  
921 (Isfahan). 2015;12: 1–13. doi:10.4103/1735-3327.150286
- 922 88. Rathmann H, Reyes-Centeno H. Testing the utility of dental morphological trait  
923 combinations for inferring human neutral genetic variation. *Proc Natl Acad Sci U S A*.  
924 2020;117: 10769–10777. doi:10.1073/pnas.1914330117
- 925 89. Malaspinas AS, Westaway MC, Muller C, Sousa VC, Lao O, Alves I, et al. A genomic  
926 history of Aboriginal Australia. *Nature*. 2016;538: 207–214. doi:10.1038/nature18299
- 927 90. Matsumura H, Hung H chun, Higham C, Zhang C, Yamagata M, Nguyen LC, et al.  
928 Craniometrics Reveal “Two Layers” of Prehistoric Human Dispersal in Eastern Eurasia.  
929 *Sci Rep*. 2019;9: 1451. doi:10.1038/s41598-018-35426-z
- 930 91. Stinchcombe JR, Hoekstra HE. Combining population genomics and quantitative  
931 genetics: Finding the genes underlying ecologically important traits. *Heredity (Edinb)*.  
932 2008;100: 158–170. doi:10.1038/sj.hdy.6800937
- 933 92. Zichello JM, Baab KL, McNulty KP, Raxworthy CJ, Steiper ME. Hominoid intraspecific  
934 cranial variation mirrors neutral genetic diversity. *Proc Natl Acad Sci U S A*. 2018;115:  
935 11501–11506. doi:10.1073/pnas.1802651115
- 936 93. Corruccini RS, Sharma K, Potter RHY. Comparative genetic variance and heritability of  
937 dental occlusal variables in U.S. and Northwest Indian twins. *Am J Phys Anthropol*.  
938 1986;70: 293–299. doi:10.1002/ajpa.1330700304
- 939 94. Dempsey PJ, Townsend GC. Genetic and environmental contributions to variation in  
940 human tooth size. *Heredity (Edinb)*. 2001;86: 685–693. doi:10.1046/j.1365-  
941 2540.2001.00878.x
- 942 95. Mitteroecker P, Huttegger SM. The Concept of Morphospaces in Evolutionary and  
943 Developmental Biology: Mathematics and Metaphors. *Biol Theory*. 2009;4: 54–67.  
944 doi:10.1162/biot.2009.4.1.54
- 945 96. McGhee GR. Limits in the evolution of biological form: A theoretical morphologic  
946 perspective. *Interface Focus*. 2015;5. doi:10.1098/rsfs.2015.0034
- 947 97. Savell KRR, Auerbach BM, Roseman CC. Constraint, natural selection, and the  
948 evolution of human body form. *Proc Natl Acad Sci U S A*. 2016;113: 9492–9497.  
949 doi:10.1073/pnas.1603632113
- 950 98. Lahr MM, Foley R. Multiple dispersals and modern human origins. *Evol Anthropol*  
951 *Issues, News, Rev*. 1994;3: 48–60. doi:10.1002/evan.1360030206
- 952 99. Forster P, Matsumura S. Did early humans go north or south? *Science*. American  
953 Association for the Advancement of Science; 2005. pp. 965–966.  
954 doi:10.1126/science.1113261
- 955 100. Marean CW. An Evolutionary Anthropological Perspective on Modern Human Origins.  
956 *Annu Rev Anthropol*. 2015;44: 533–556. doi:10.1146/annurev-anthro-102313-025954
- 957 101. Pagani L, Schiffels S, Gurdasani D, Danecek P, Scally A, Chen Y, et al. Tracing the Route  
958 of Modern Humans out of Africa by Using 225 Human Genome Sequences from  
959 Ethiopians and Egyptians. *Am J Hum Genet*. 2015;96: 986–991.  
960 doi:10.1016/j.ajhg.2015.04.019
- 961 102. Chen J, Sokal RR, Ruhlen M. Worldwide Analysis of Genetic and Linguistic  
962 Relationships of Human Populations. *Hum Biol*. 2012;84: 555–572.  
963 doi:10.3378/027.084.0506
- 964 103. Kayser M. The Human Genetic History of Oceania: Near and Remote Views of  
965 Dispersal. *Curr Biol*. 2010;20: R194–R201. doi:10.1016/j.cub.2009.12.004

- 966 104. Reich D. Who we are and how we got here : ancient DNA and the new science of the  
967 human past. Oxford University Press: Oxford; 2018.
- 968 105. Wolf AB, Akey JM. Outstanding questions in the study of archaic hominin admixture.  
969 PLoS Genet. 2018;14. doi:10.1371/journal.pgen.1007349
- 970 106. Rathmann H, Reyes-Centeno H, Ghirotto S, Creanza N, Hanihara T, Harvati K.  
971 Reconstructing human population history from dental phenotypes. Sci Rep. 2017;7:  
972 1–9. doi:10.1038/s41598-017-12621-y
- 973 107. Reyes-Centeno H, Rathmann H, Hanihara T, Harvati K. Testing modern human out-of-  
974 Africa dispersal models using dental nonmetric data. Curr Anthropol. 2017;58: S406–  
975 S417. doi:10.1086/694423
- 976 108. Gómez-Robles A, Polly PD. Morphological integration in the hominin dentition:  
977 Evolutionary, developmental, and functional factors. Evolution (N Y). 2012;66: 1024–  
978 1043. doi:10.1111/j.1558-5646.2011.01508.x
- 979 109. Bastir M, Rosas A. Hierarchical nature of morphological integration and modularity in  
980 the human posterior face. Am J Phys Anthropol. 2005;128: 26–34.  
981 doi:10.1002/ajpa.20191
- 982 110. Walker A. Diet and Teeth. Dietary hypothesis and human evolution. Biol Sci.  
983 1981;292: 57–64. Available: <http://www.jstor.org/stable/2398643>
- 984 111. Daegling DJ, Grine FE. Compact bone distribution and biomechanics of early hominid  
985 mandibles. Am J Phys Anthropol. 1991;86: 321–39. doi:10.1002/ajpa.1330860302
- 986 112. Benazzi S, Nguyen HN, Kullmer O, Hublin JJ. Exploring the biomechanics of  
987 taurodontism. J Anat. 2015;226: 180–188. doi:10.1111/joa.12260
- 988 113. Ledogar JA, Dechow PC, Wang Q, Gharpure PH, Gordon AD, Baab KL, et al. Human  
989 feeding biomechanics: Performance, variation, and functional constraints. PeerJ.  
990 2016;2016. doi:10.7717/peerj.2242

991

## 992 **Supporting information**

993

994 See S1 Table

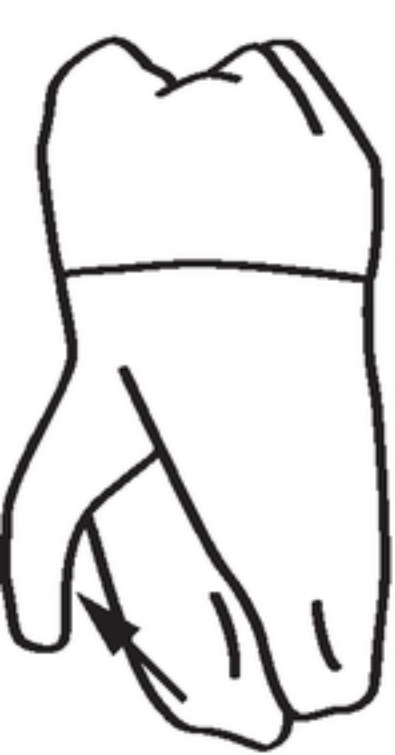

A1

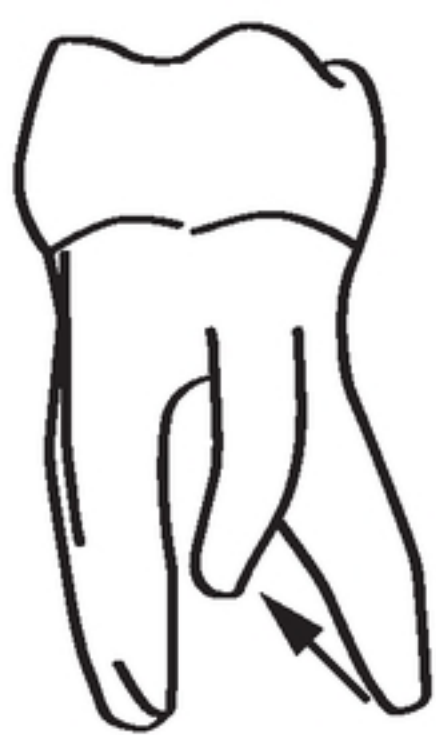

A2

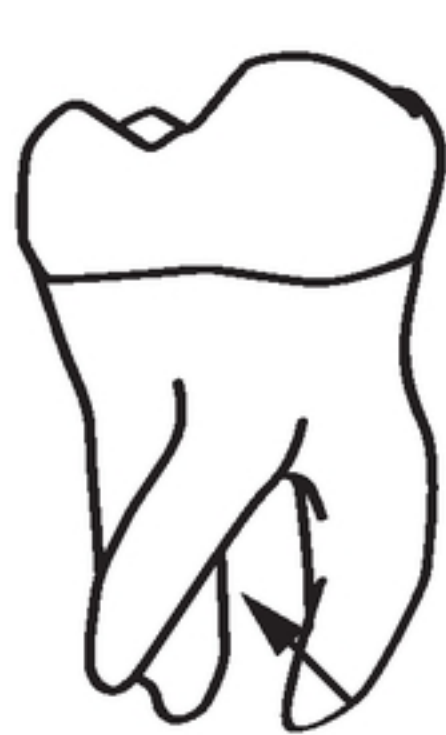

B

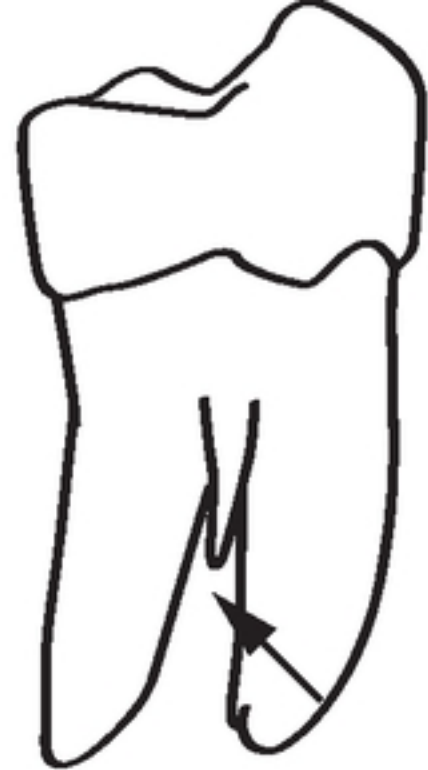

C

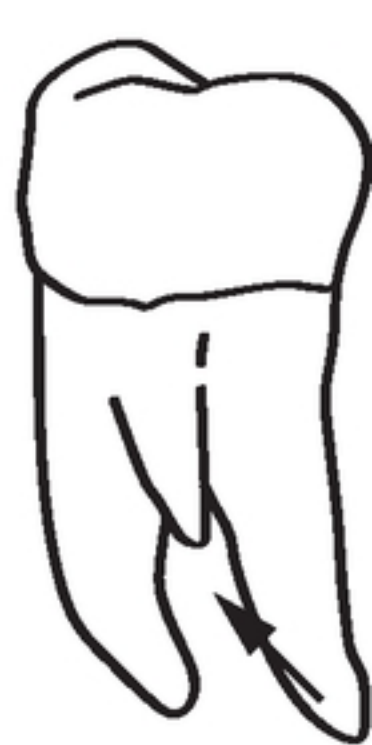

D

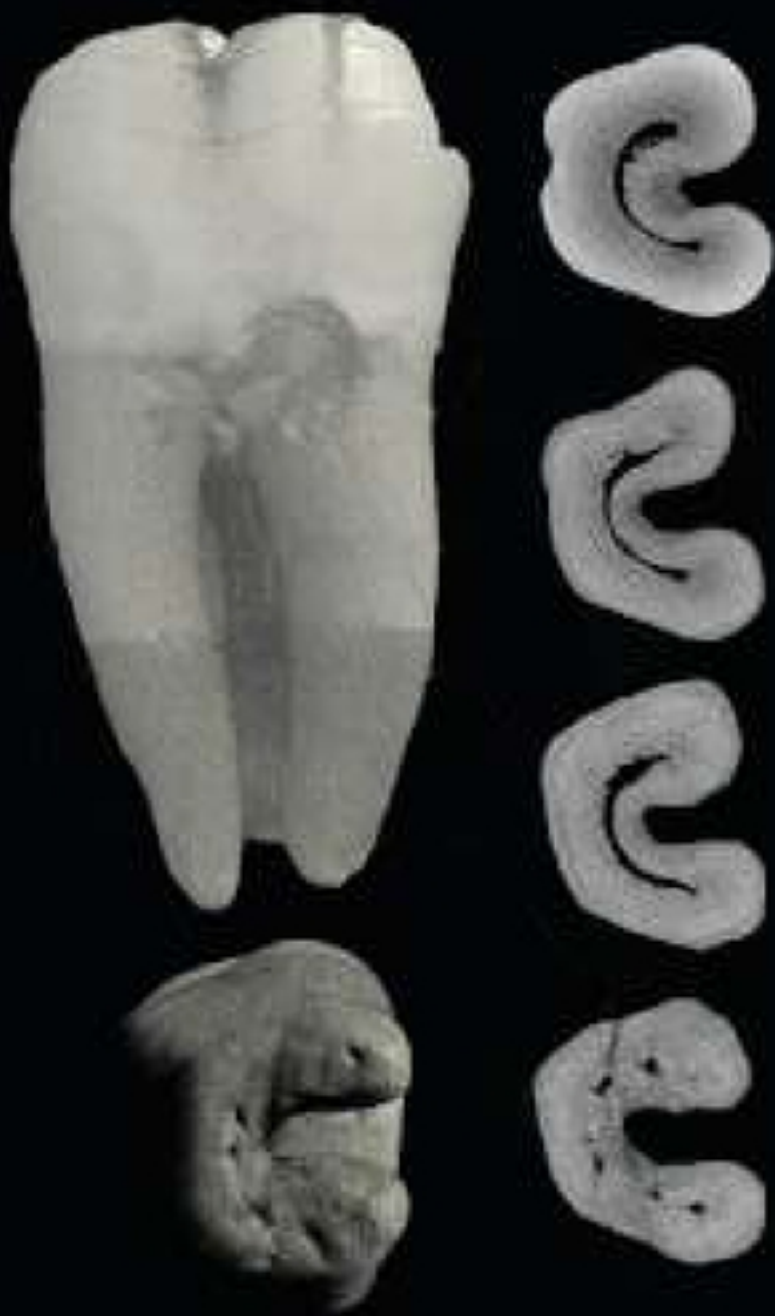

A

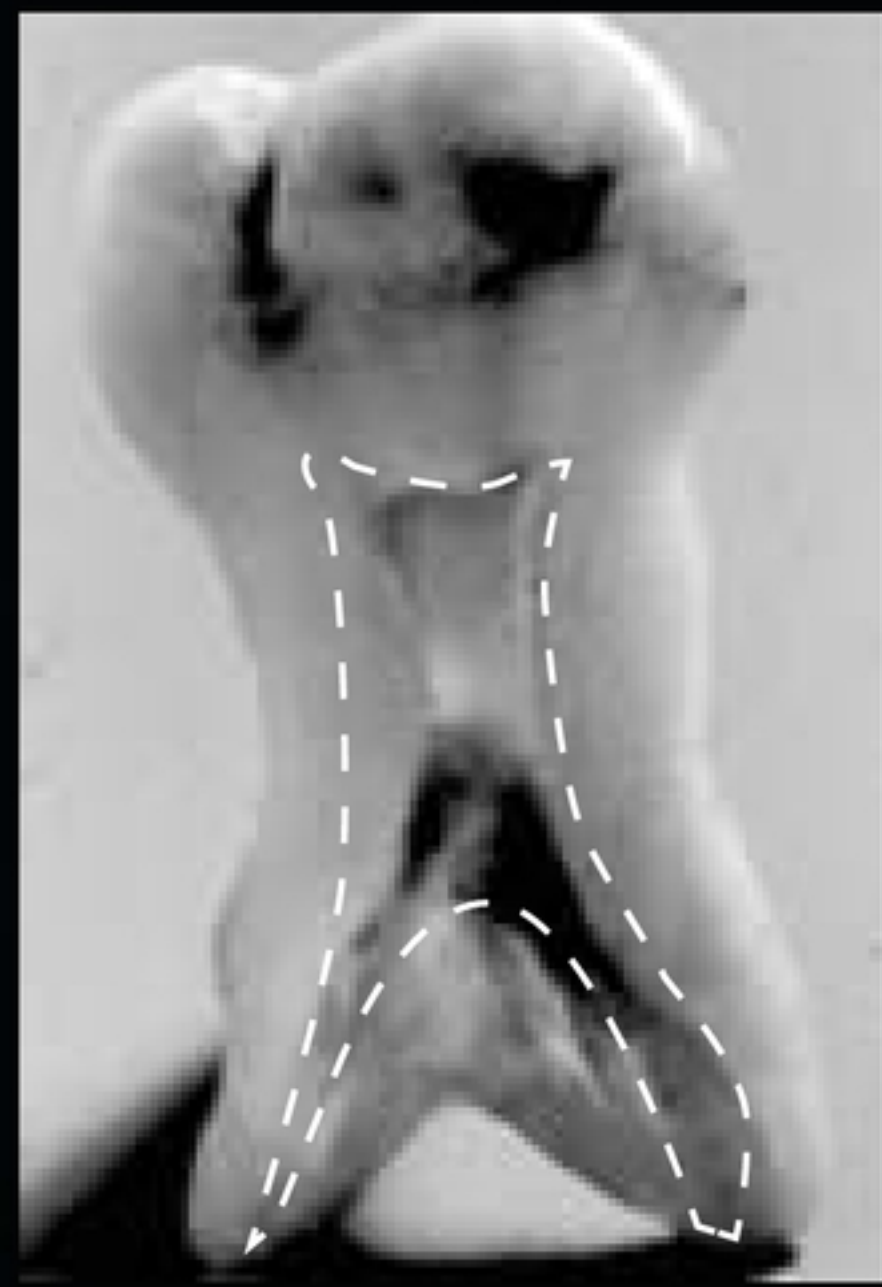

B

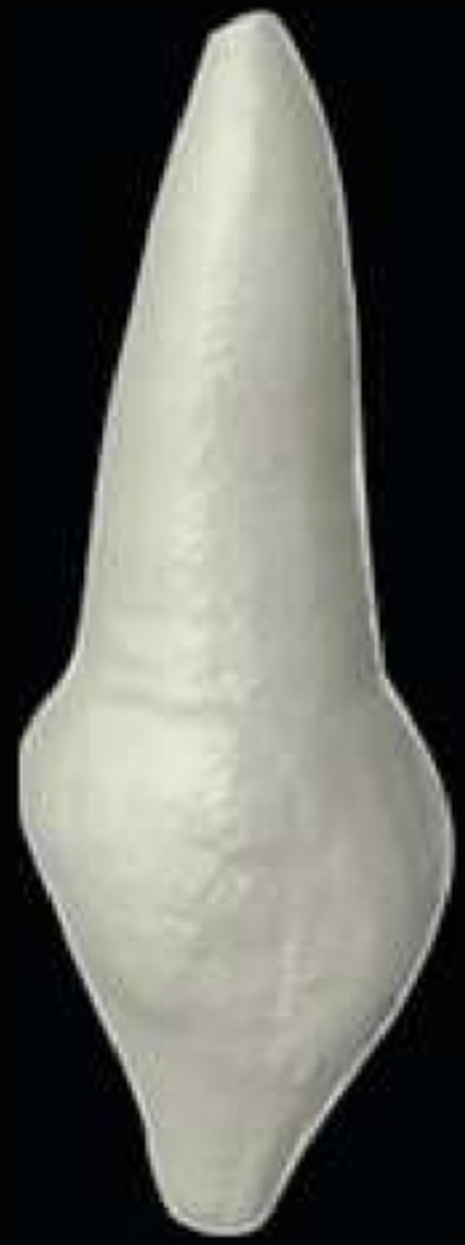

C

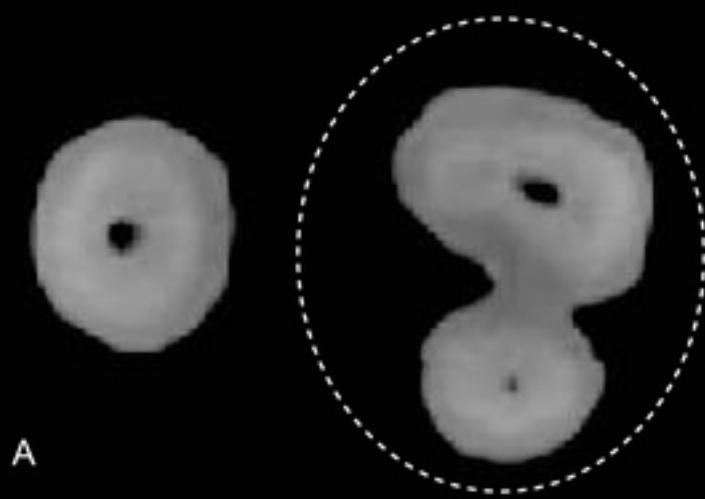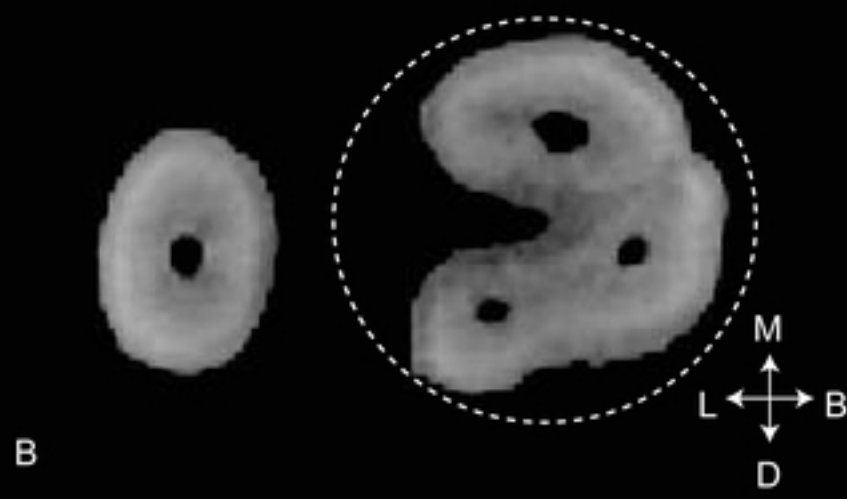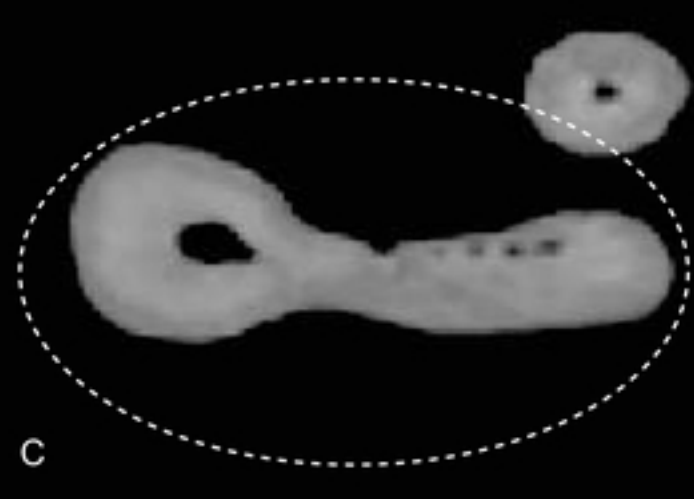

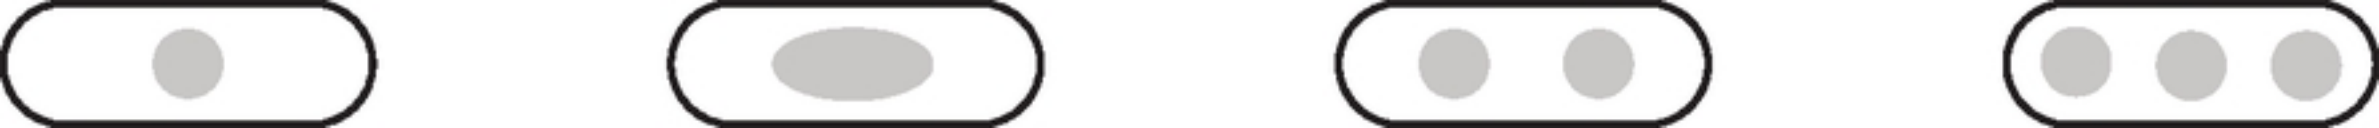

Type 1

Type 2

Type 3

Type 4

Type 5

Type 6

Type 7

Type 8

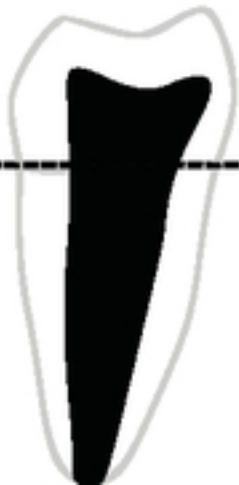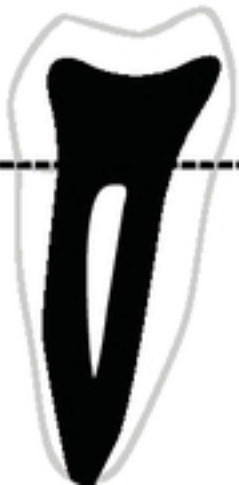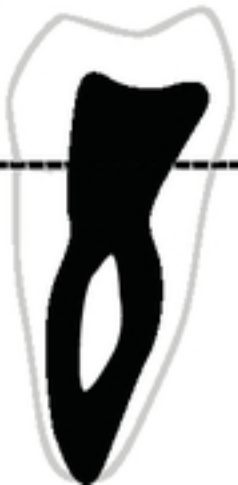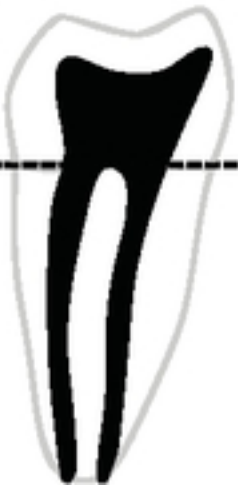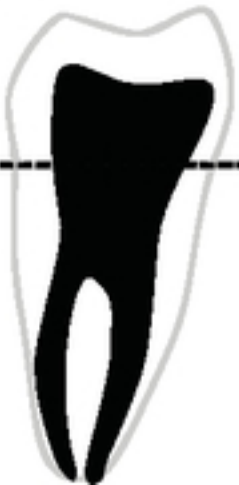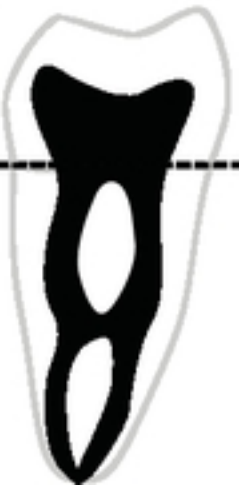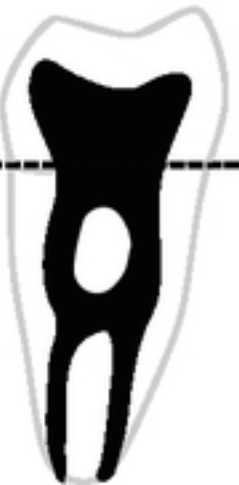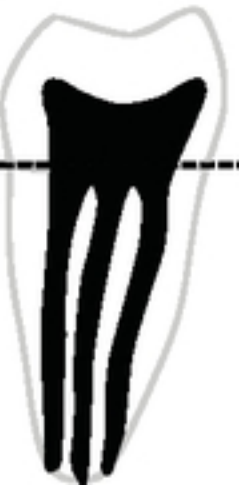

CEJ



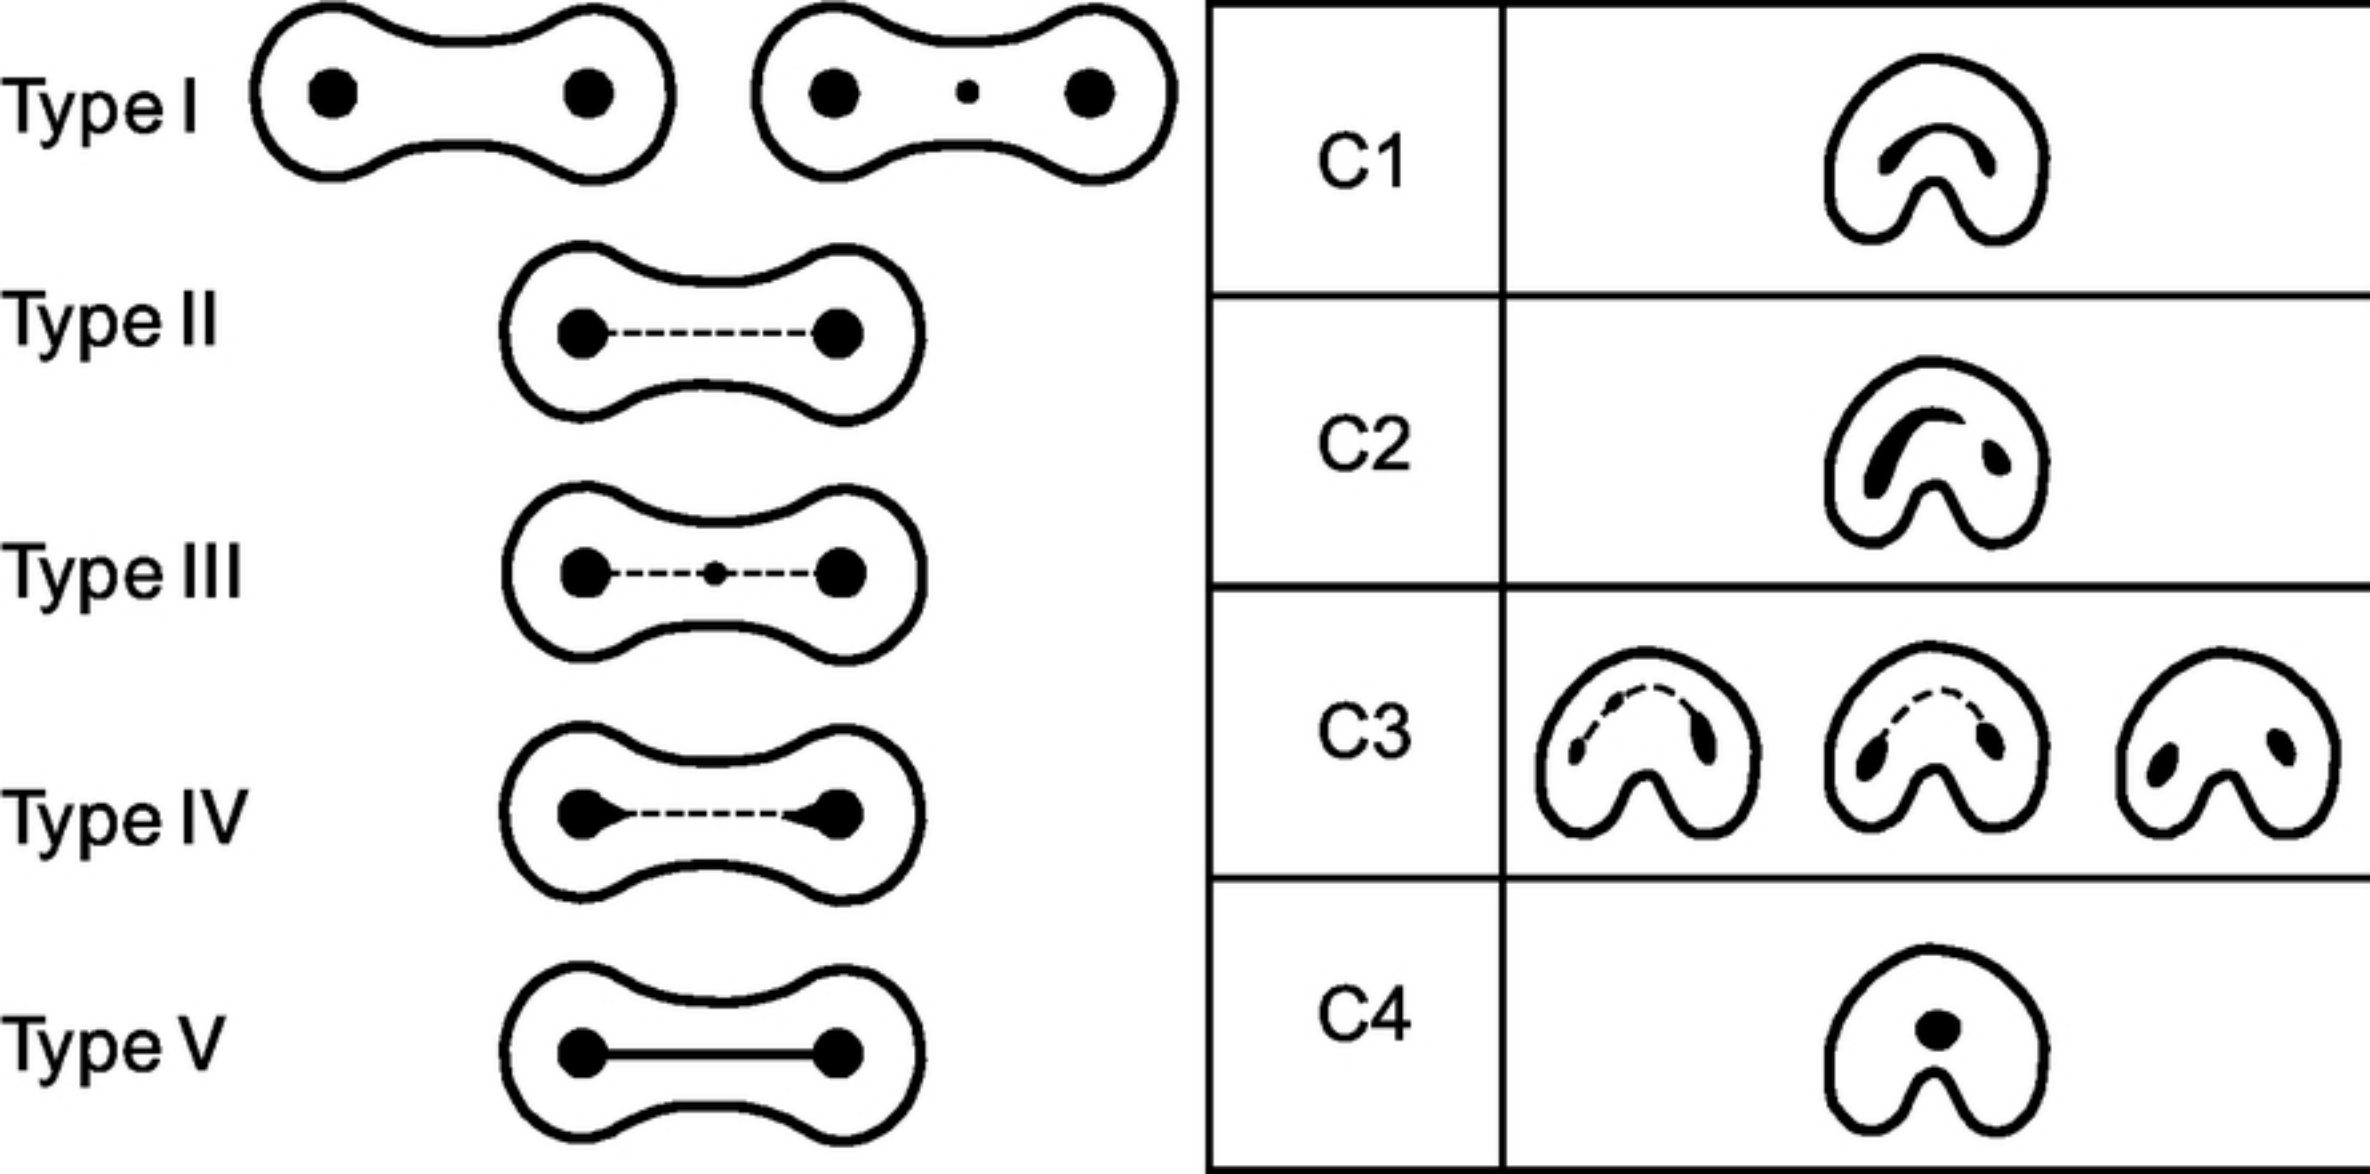

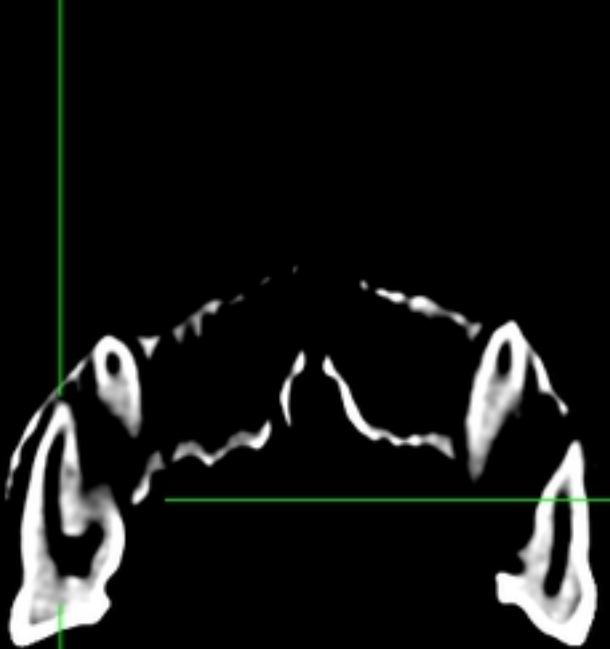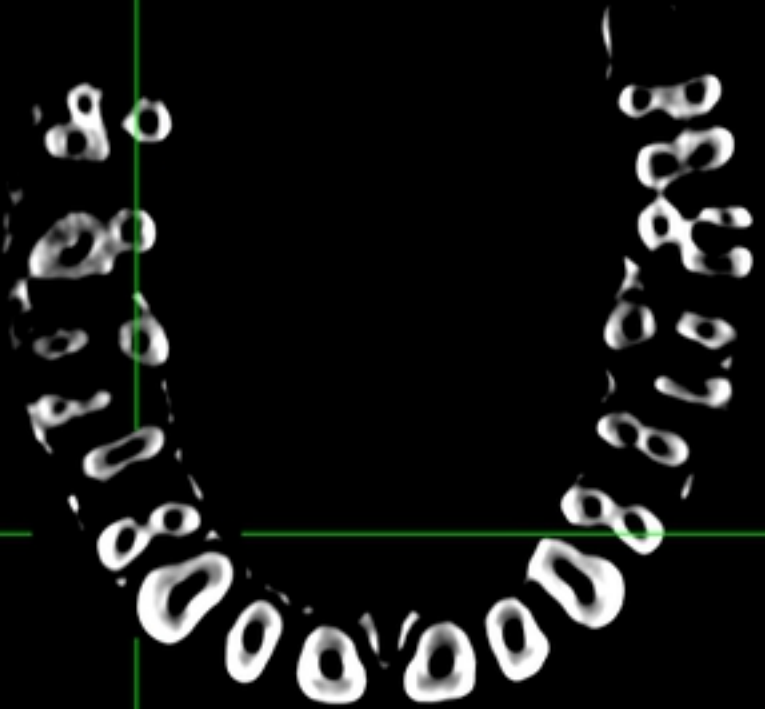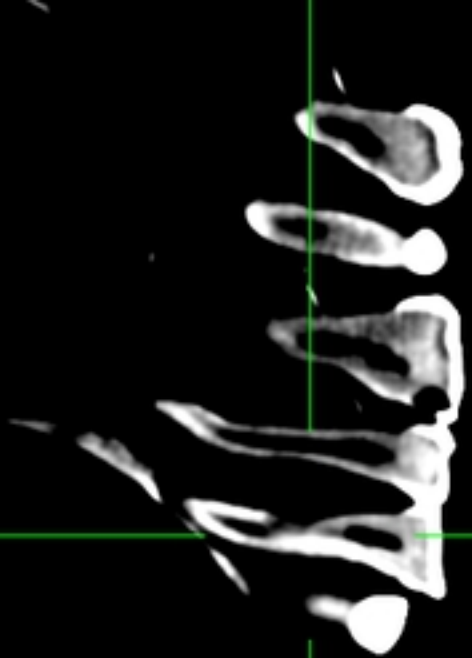

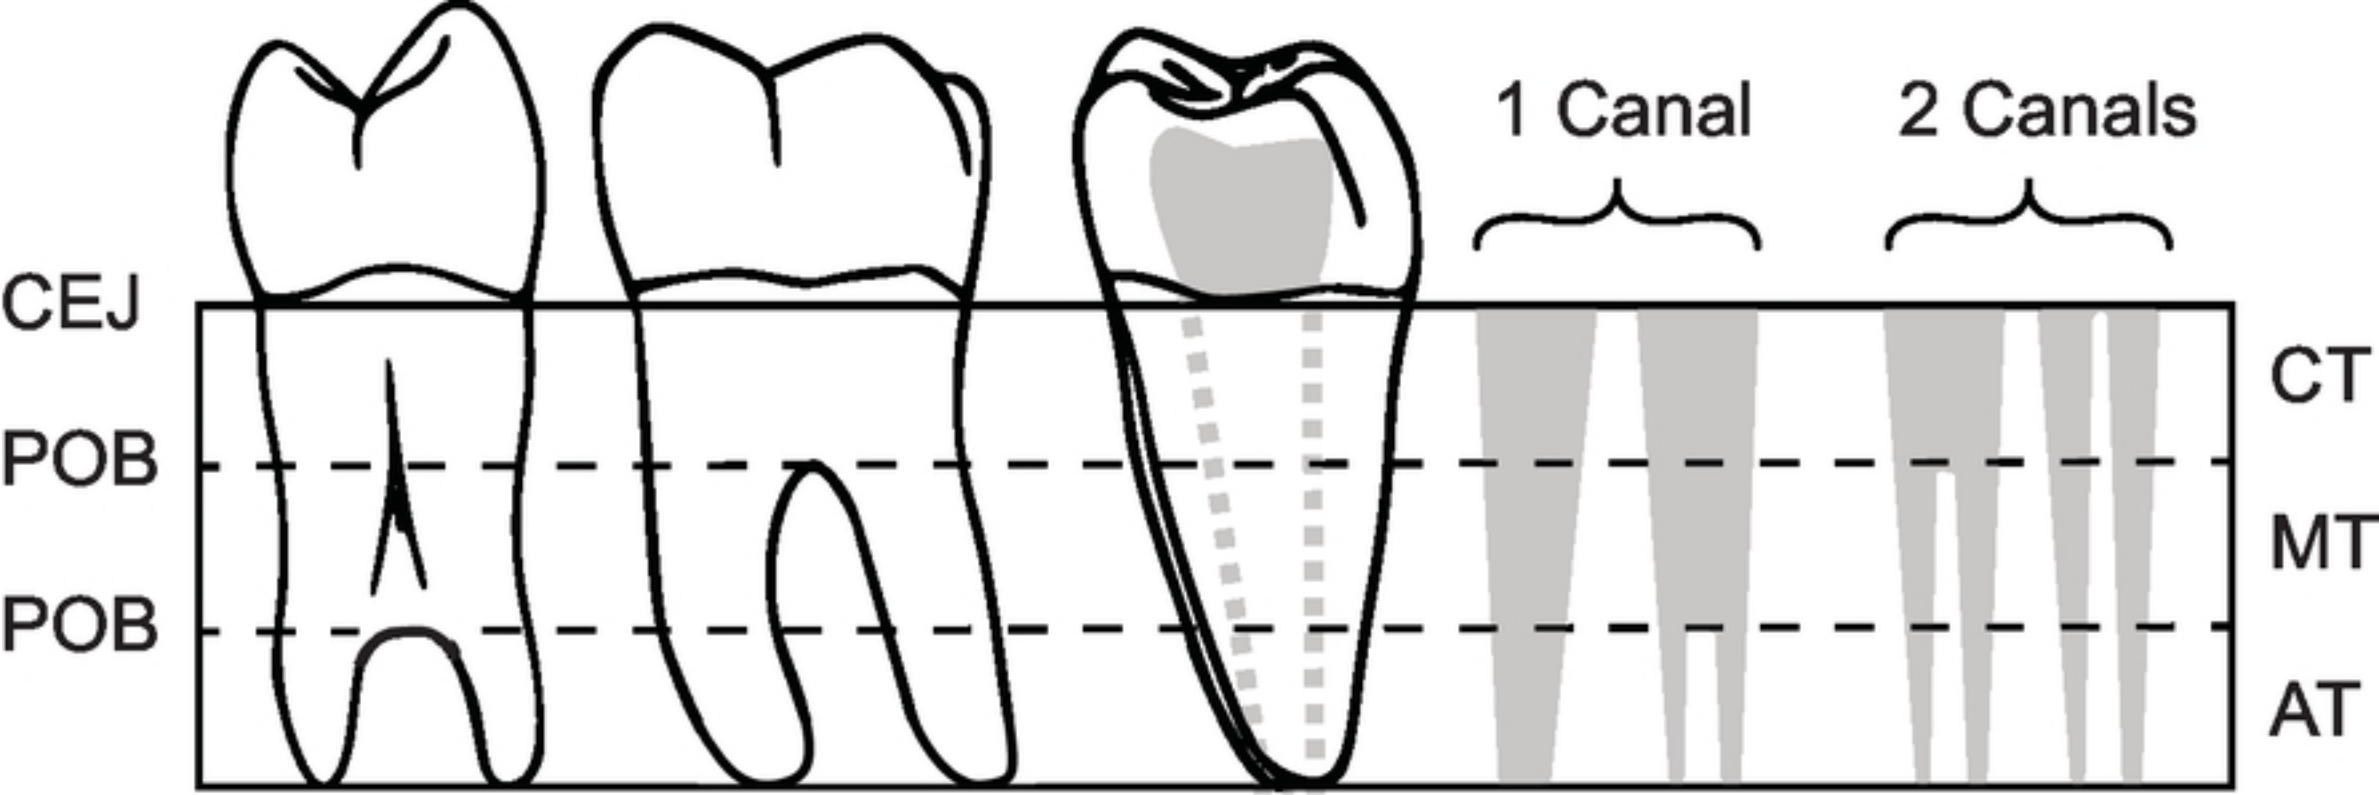

R

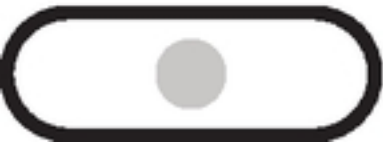

O

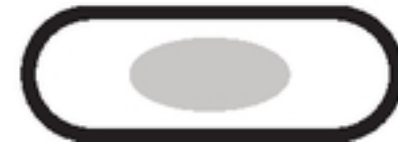

R2

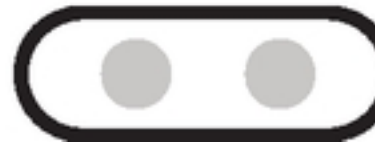

R3

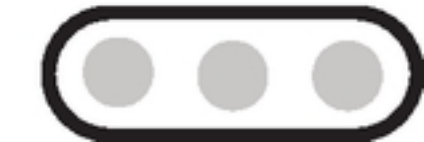

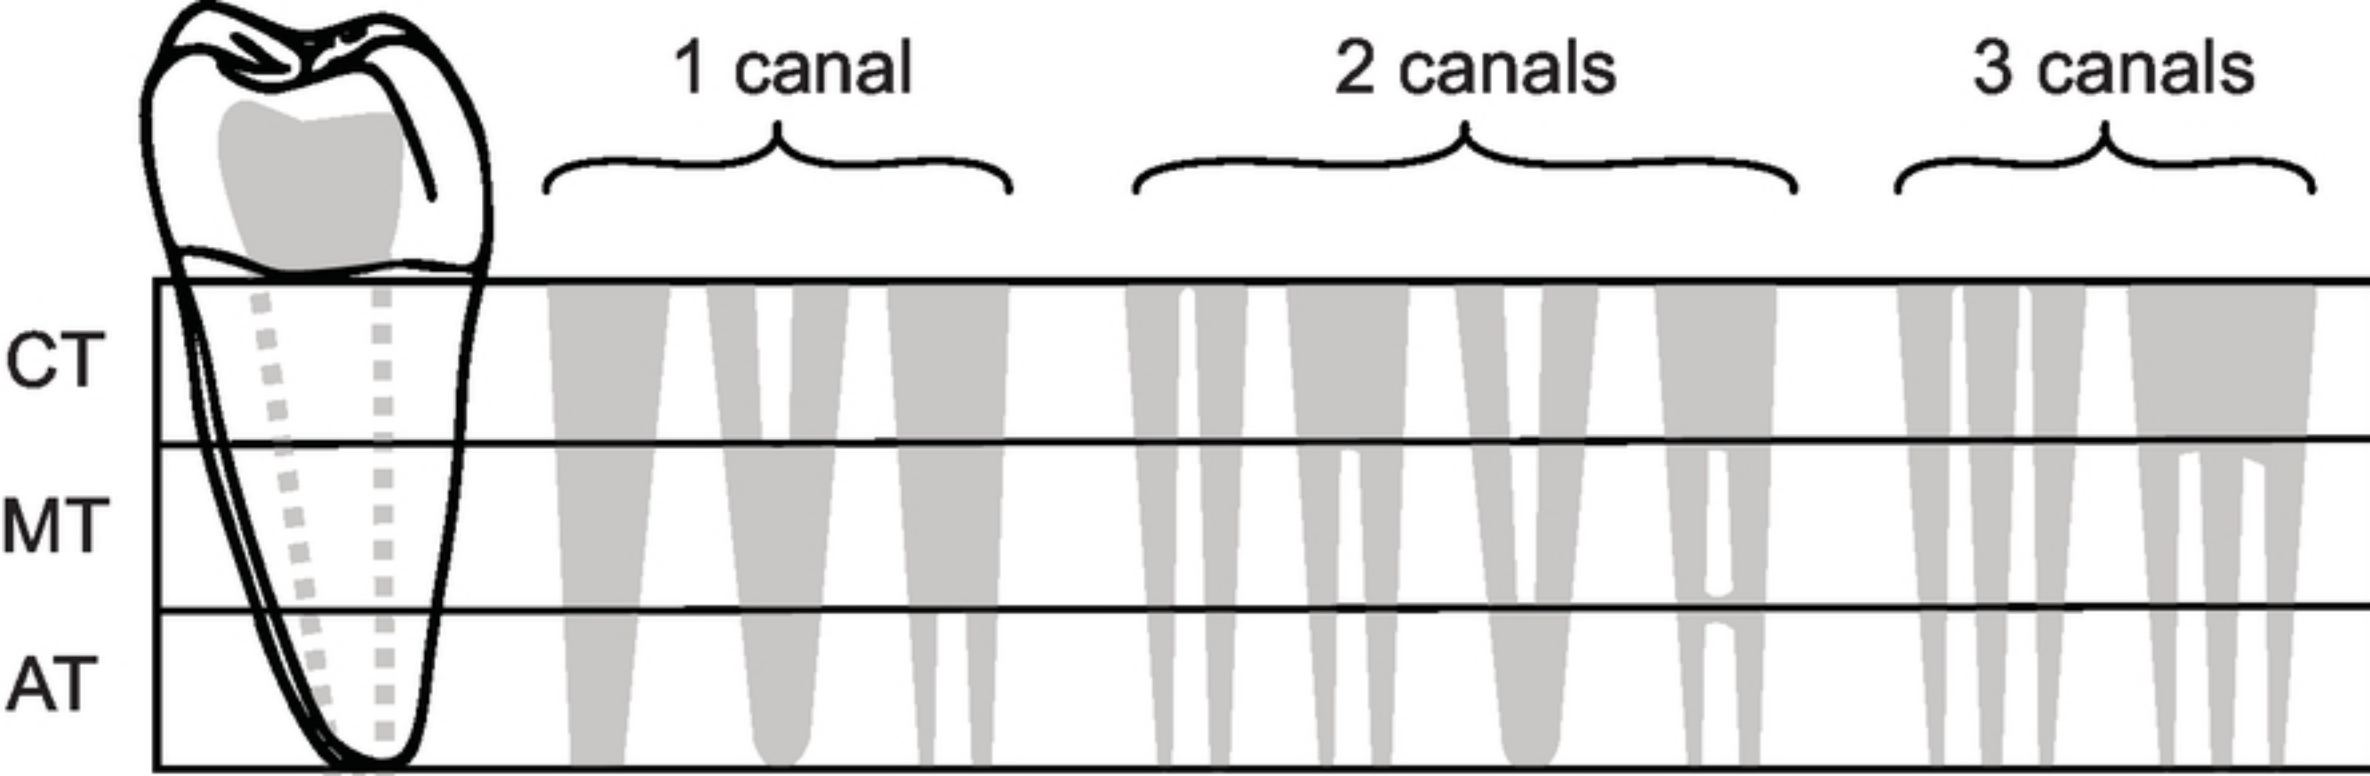

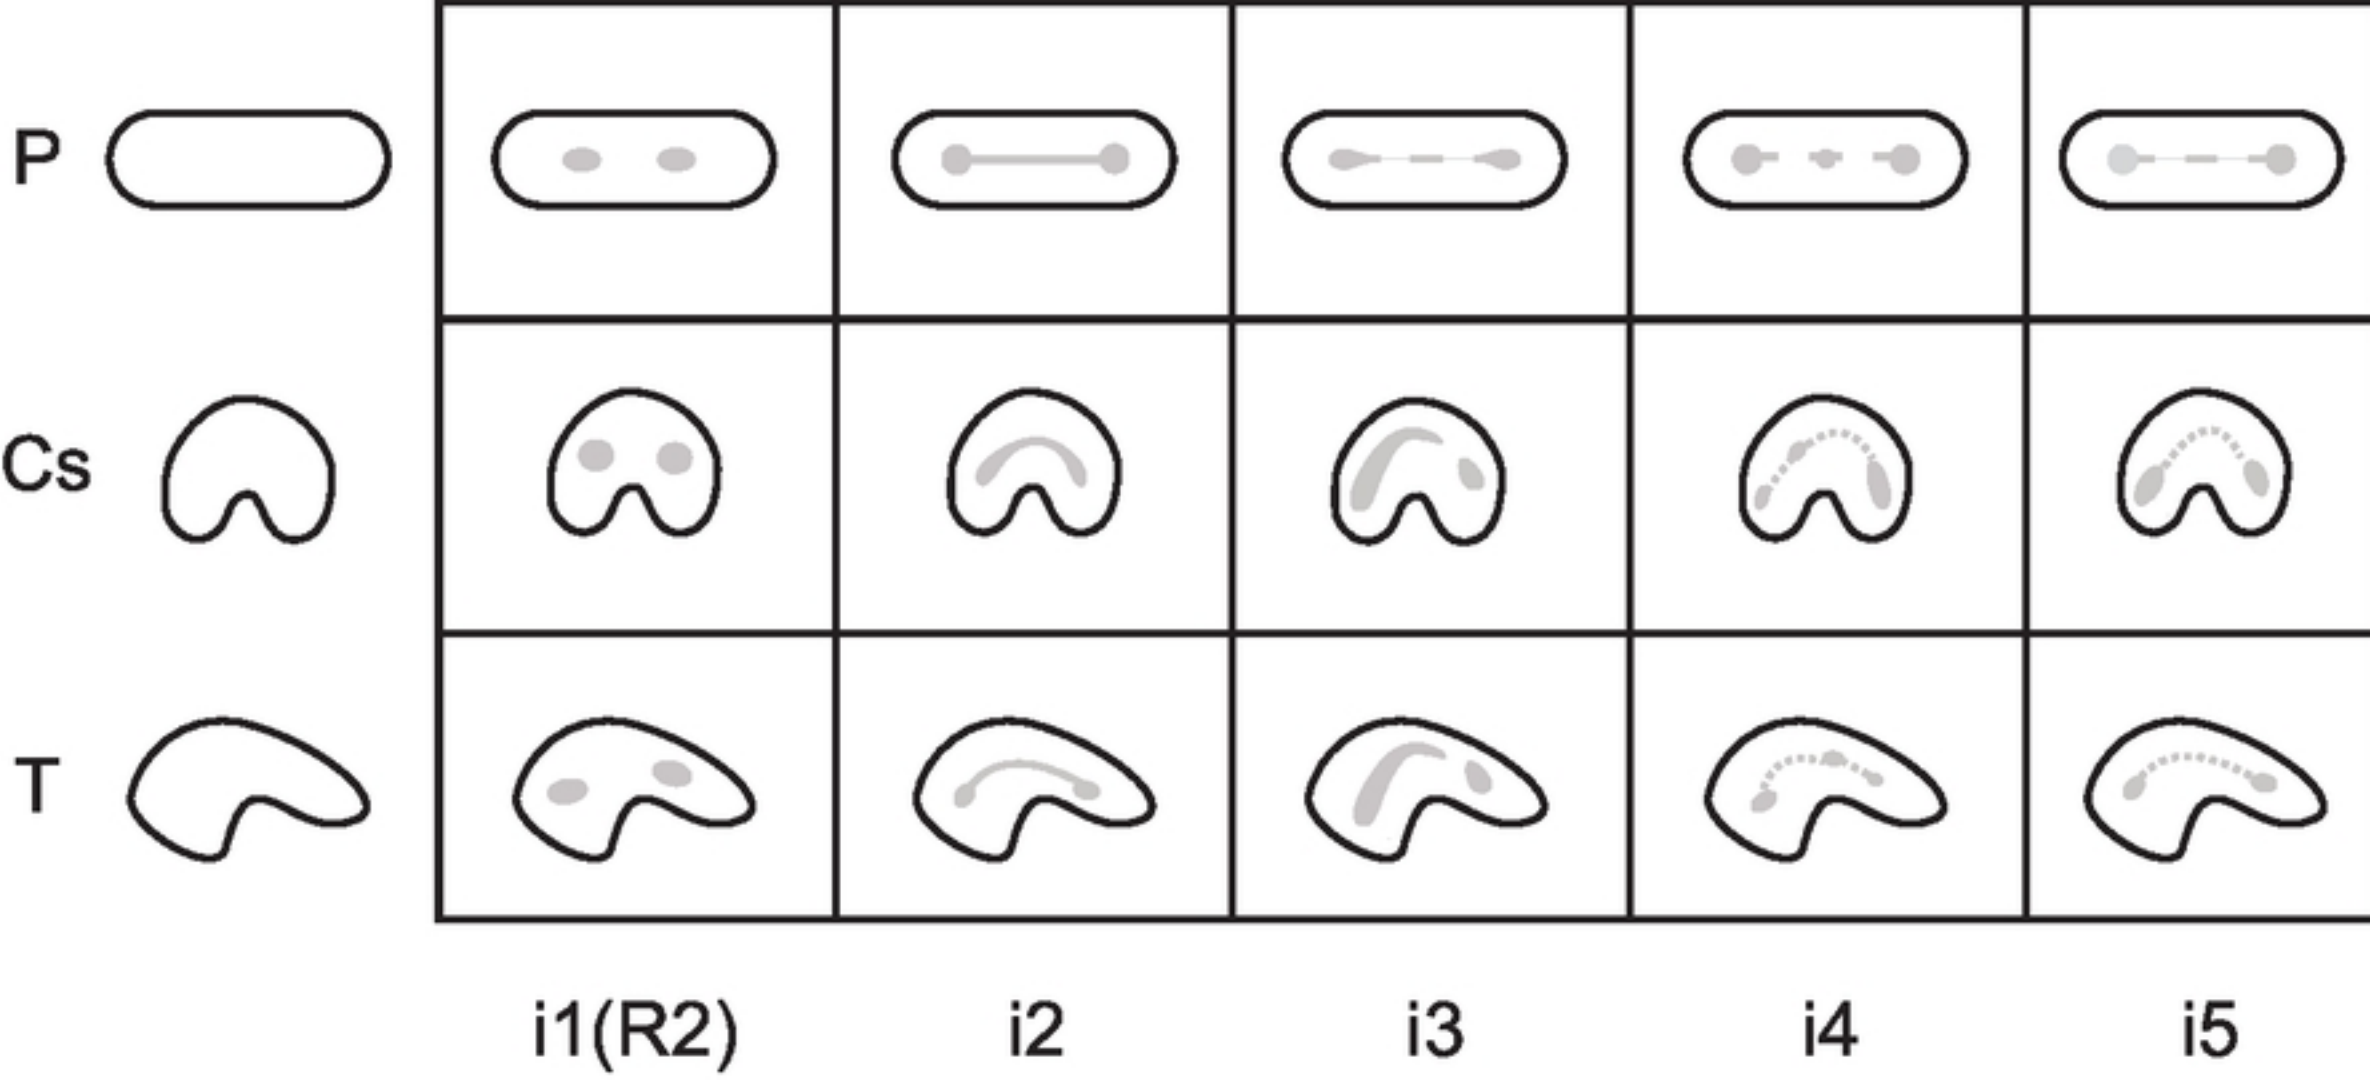

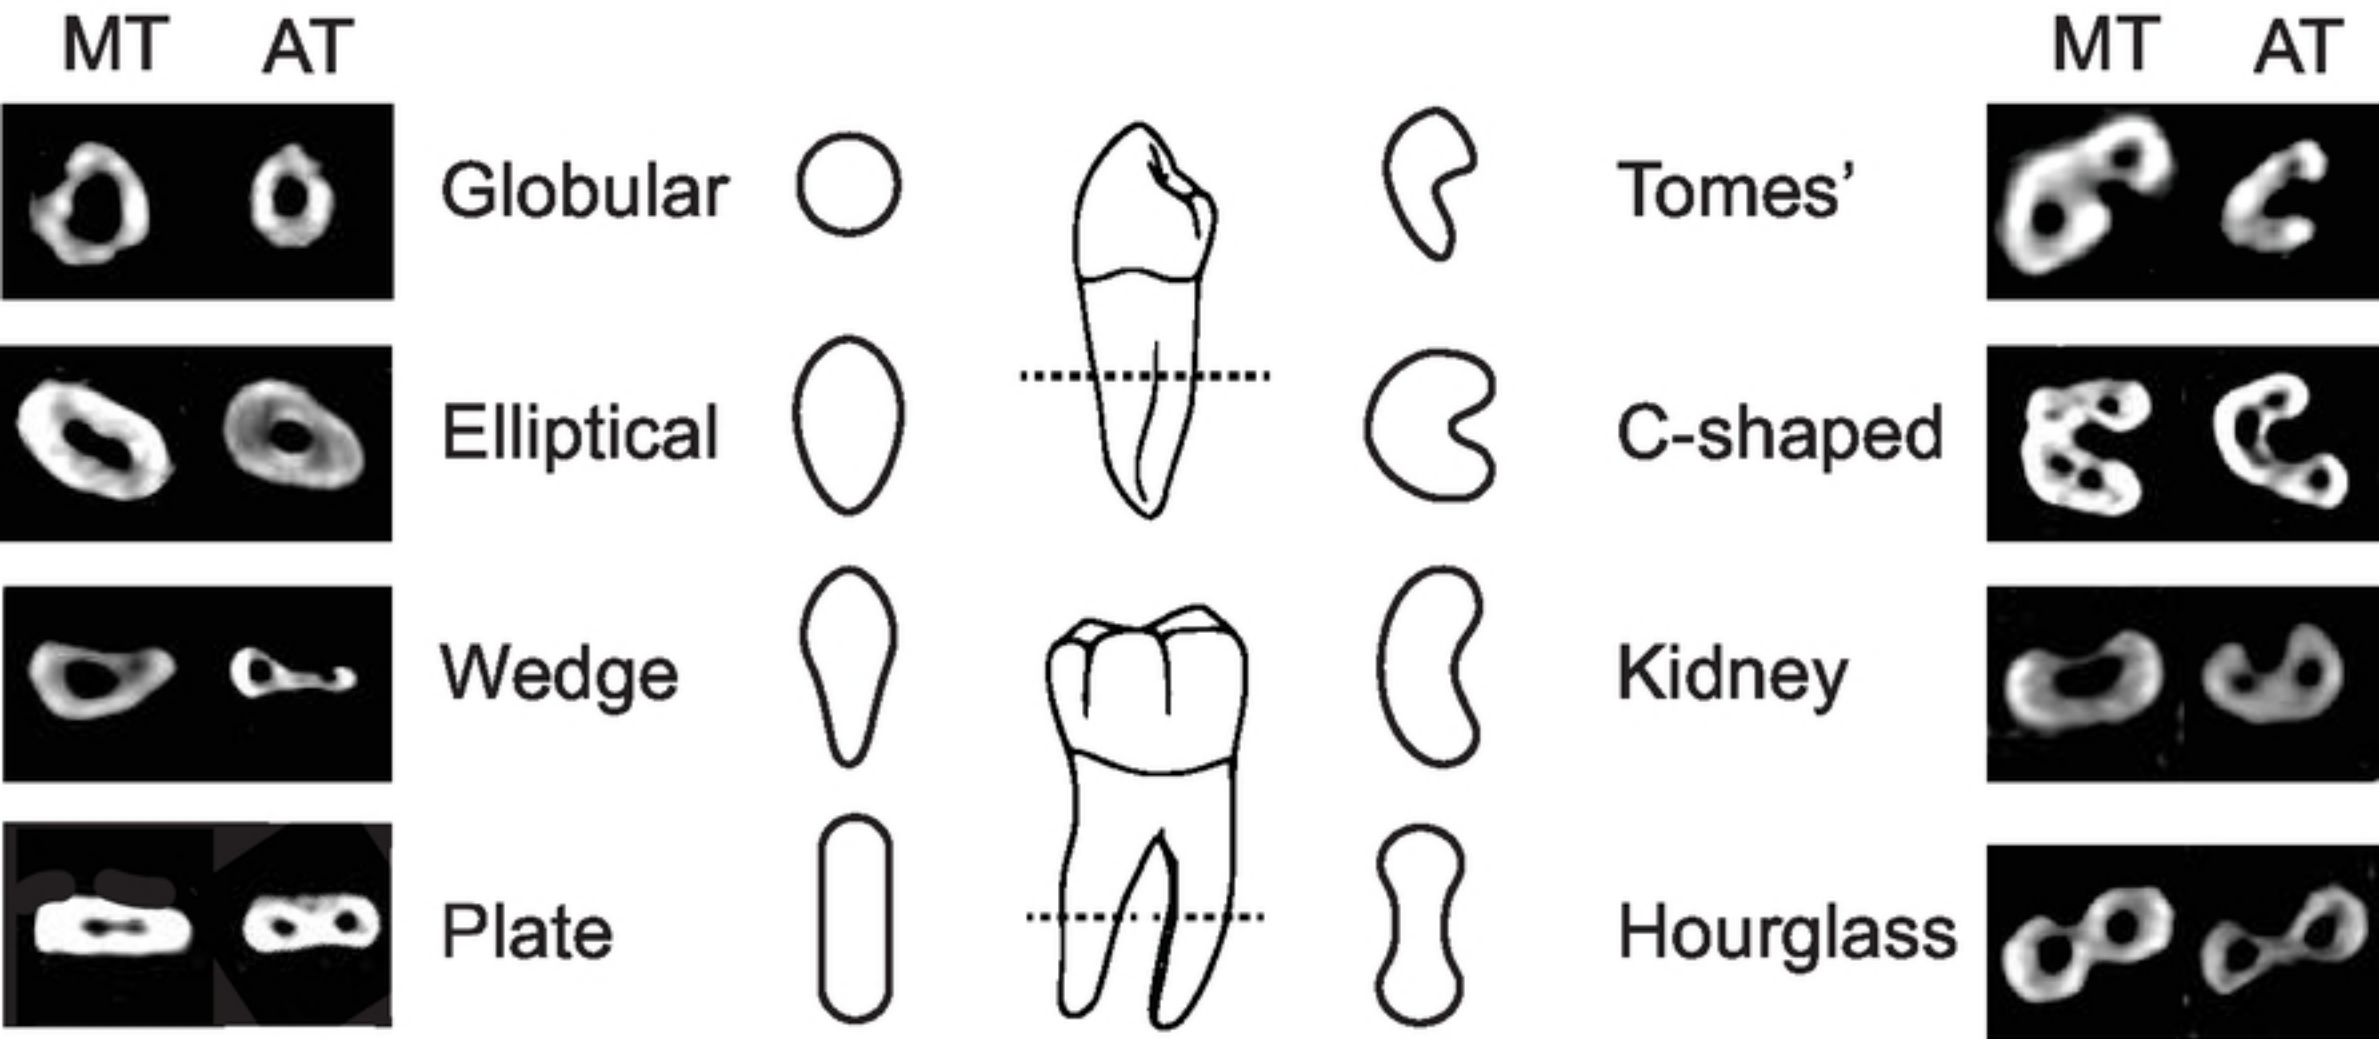

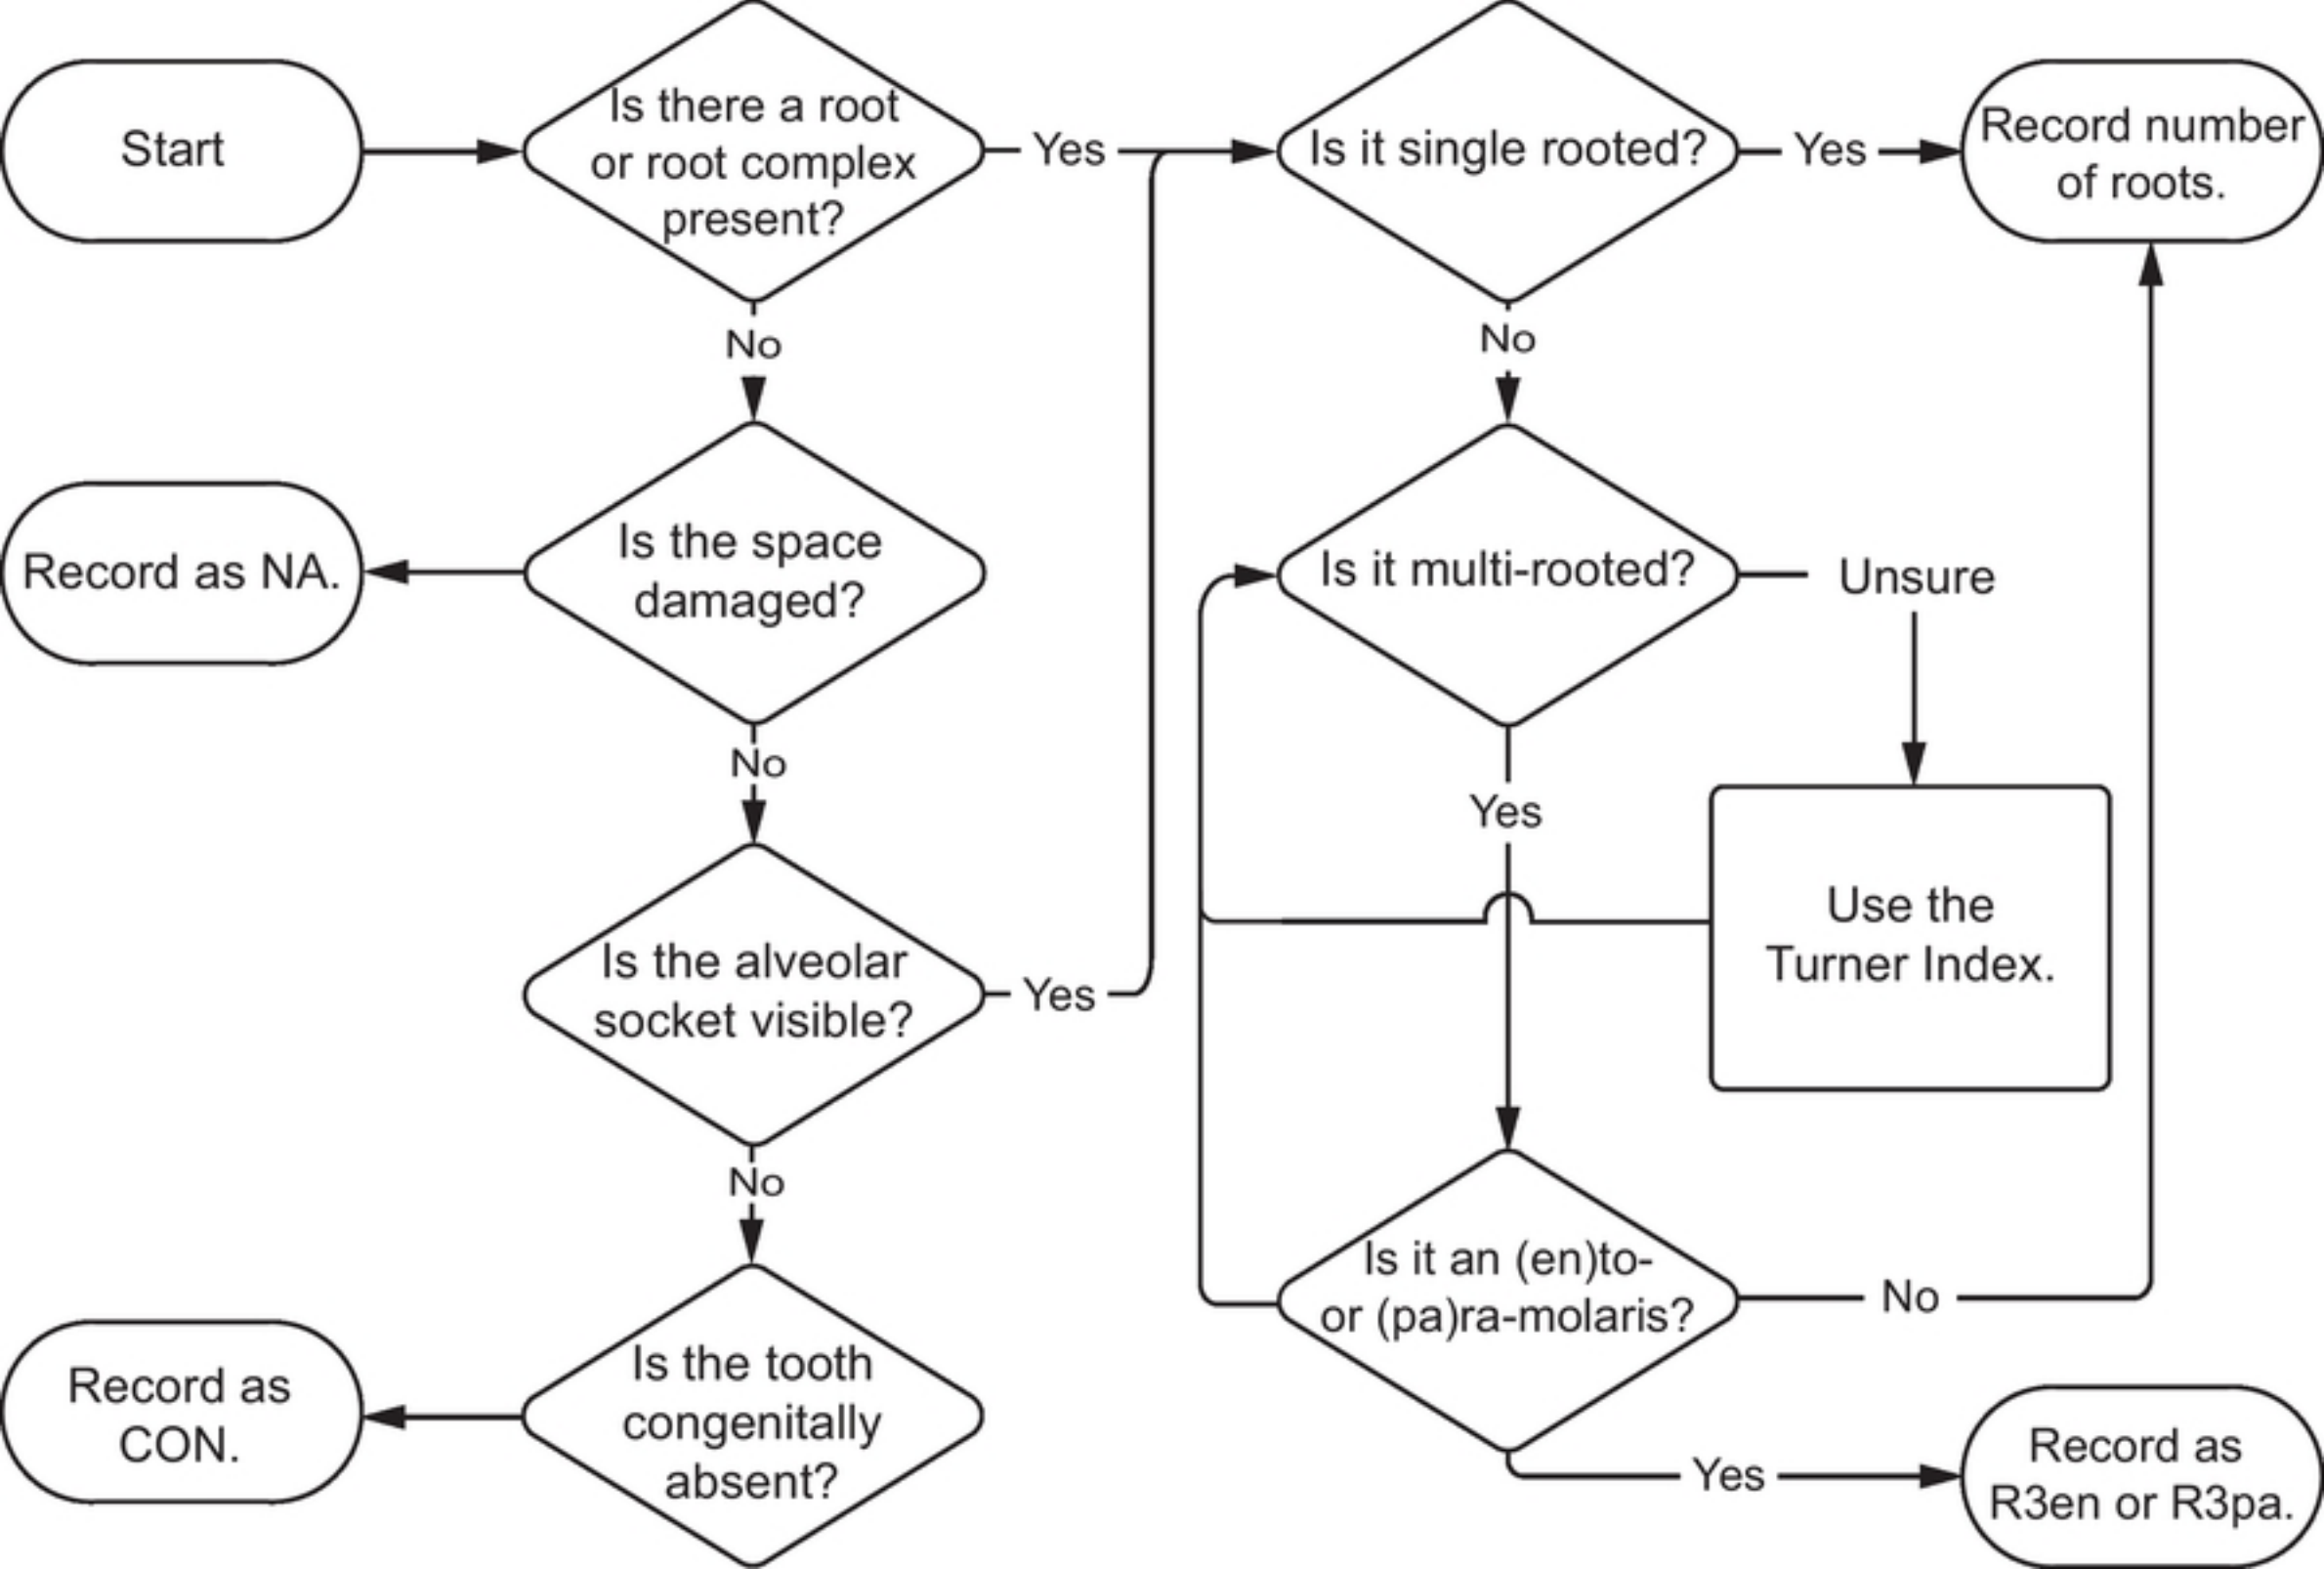



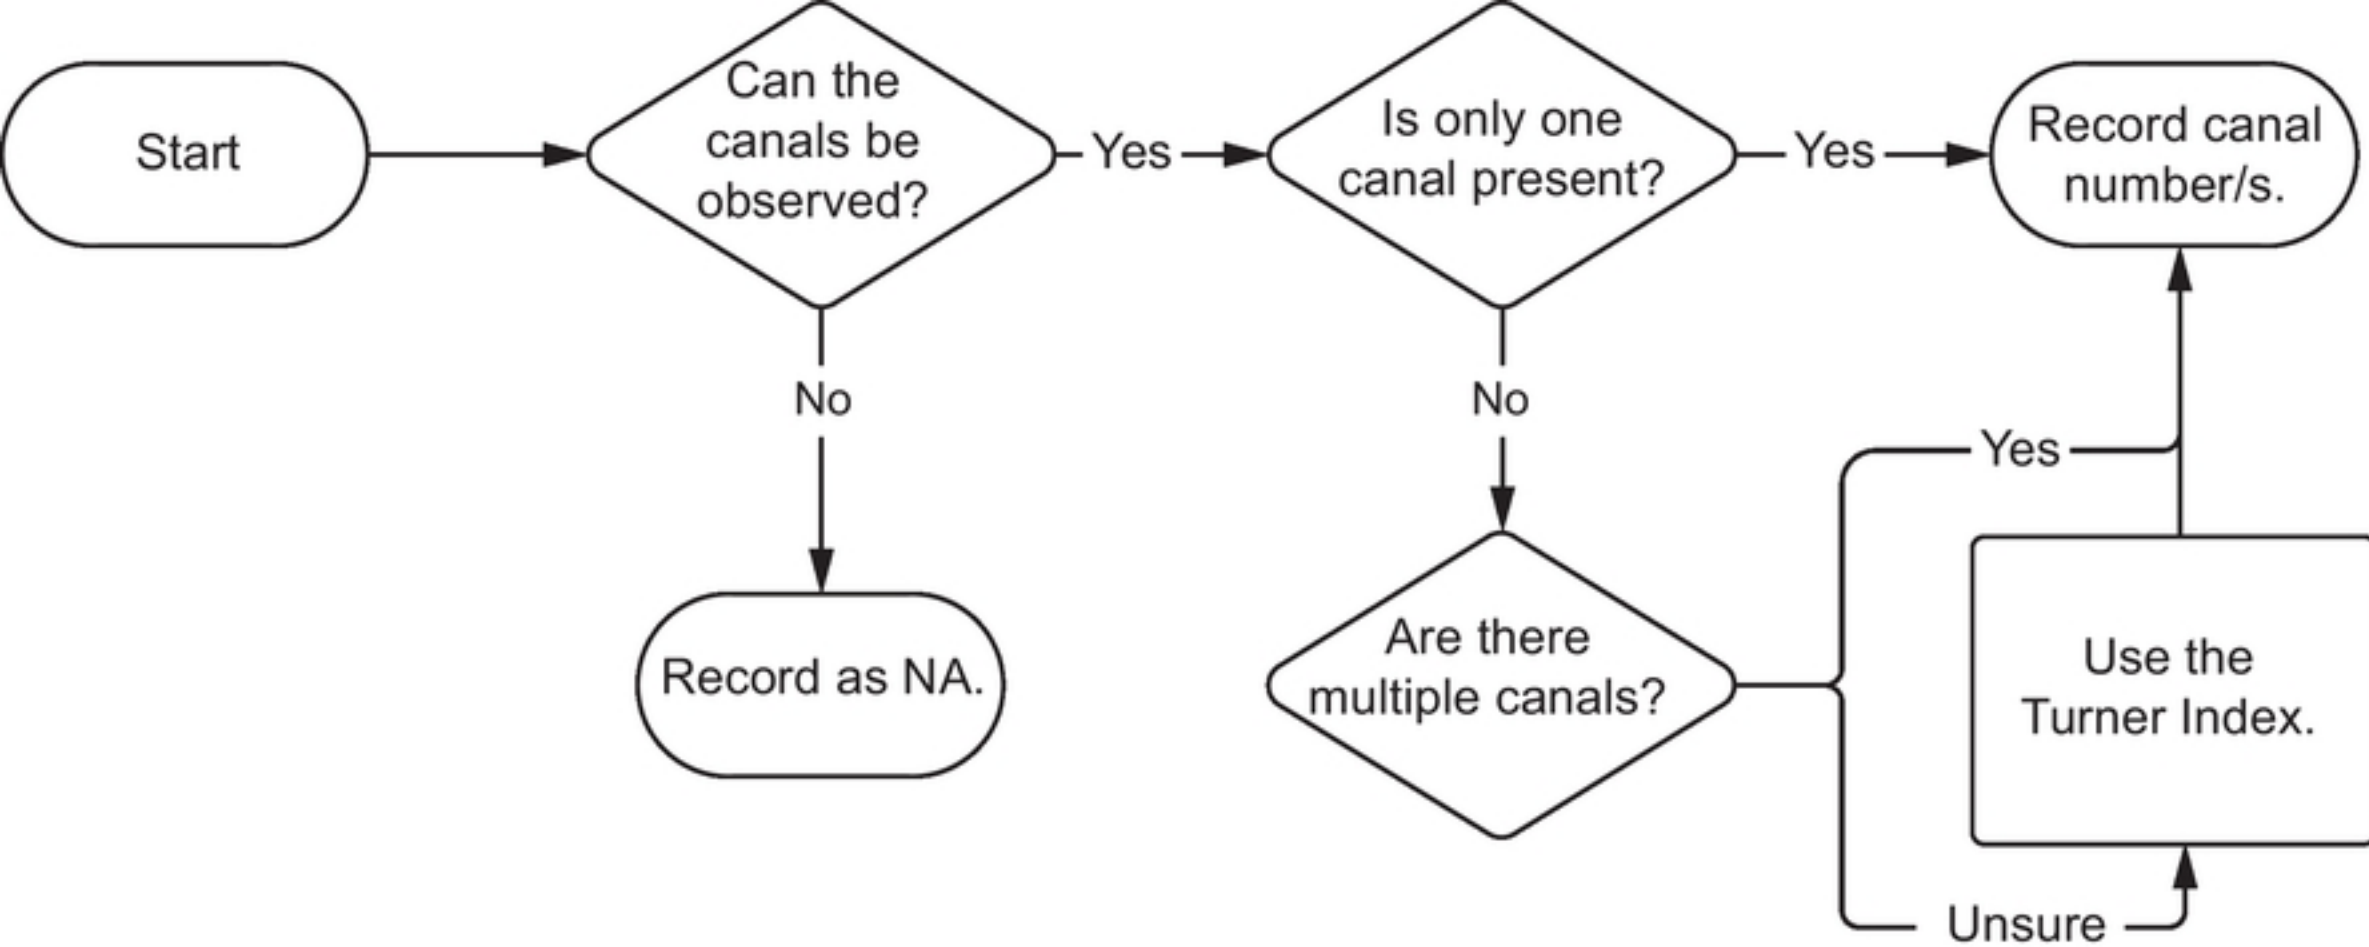

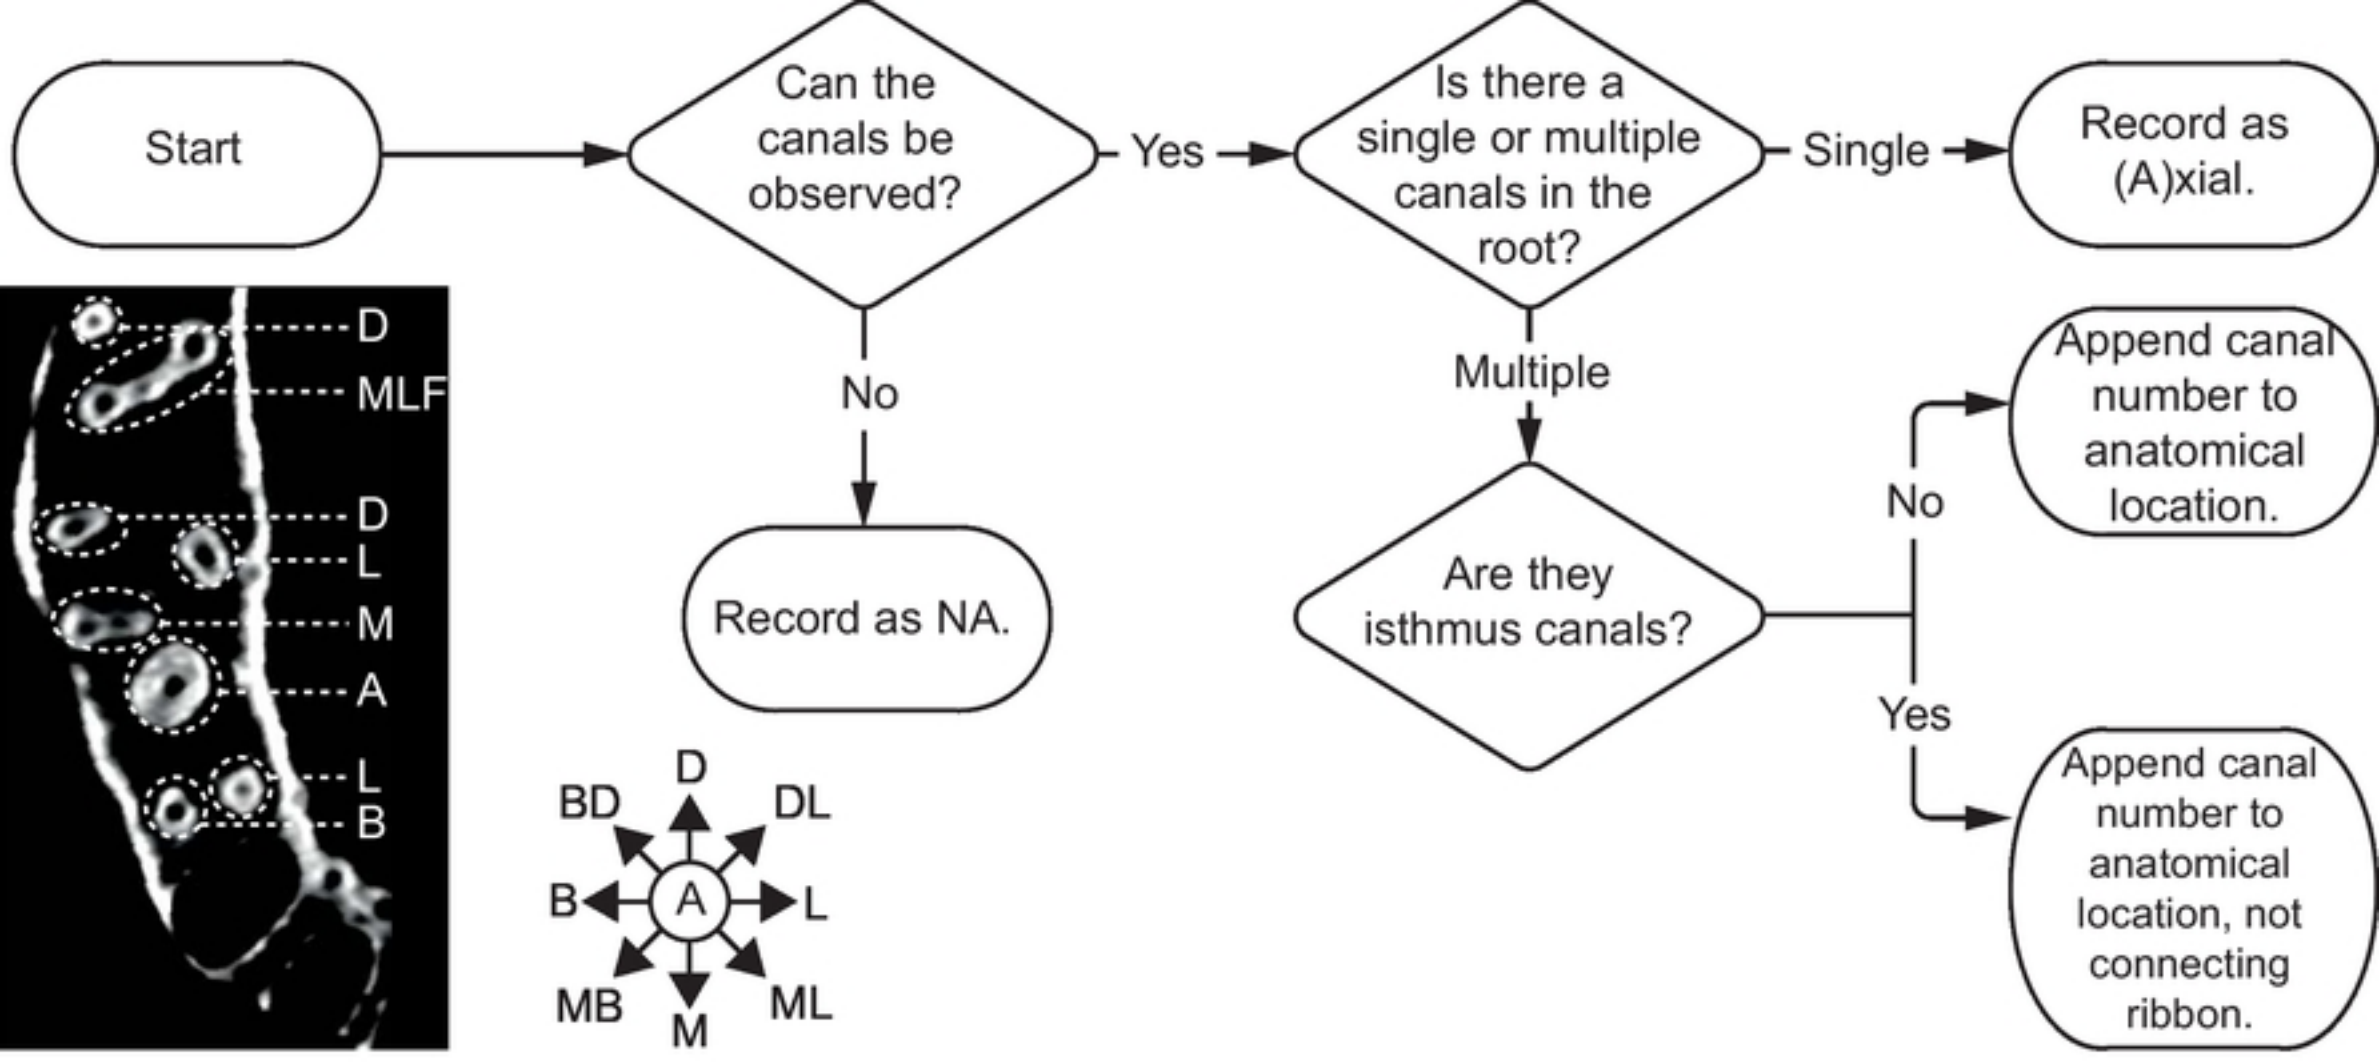

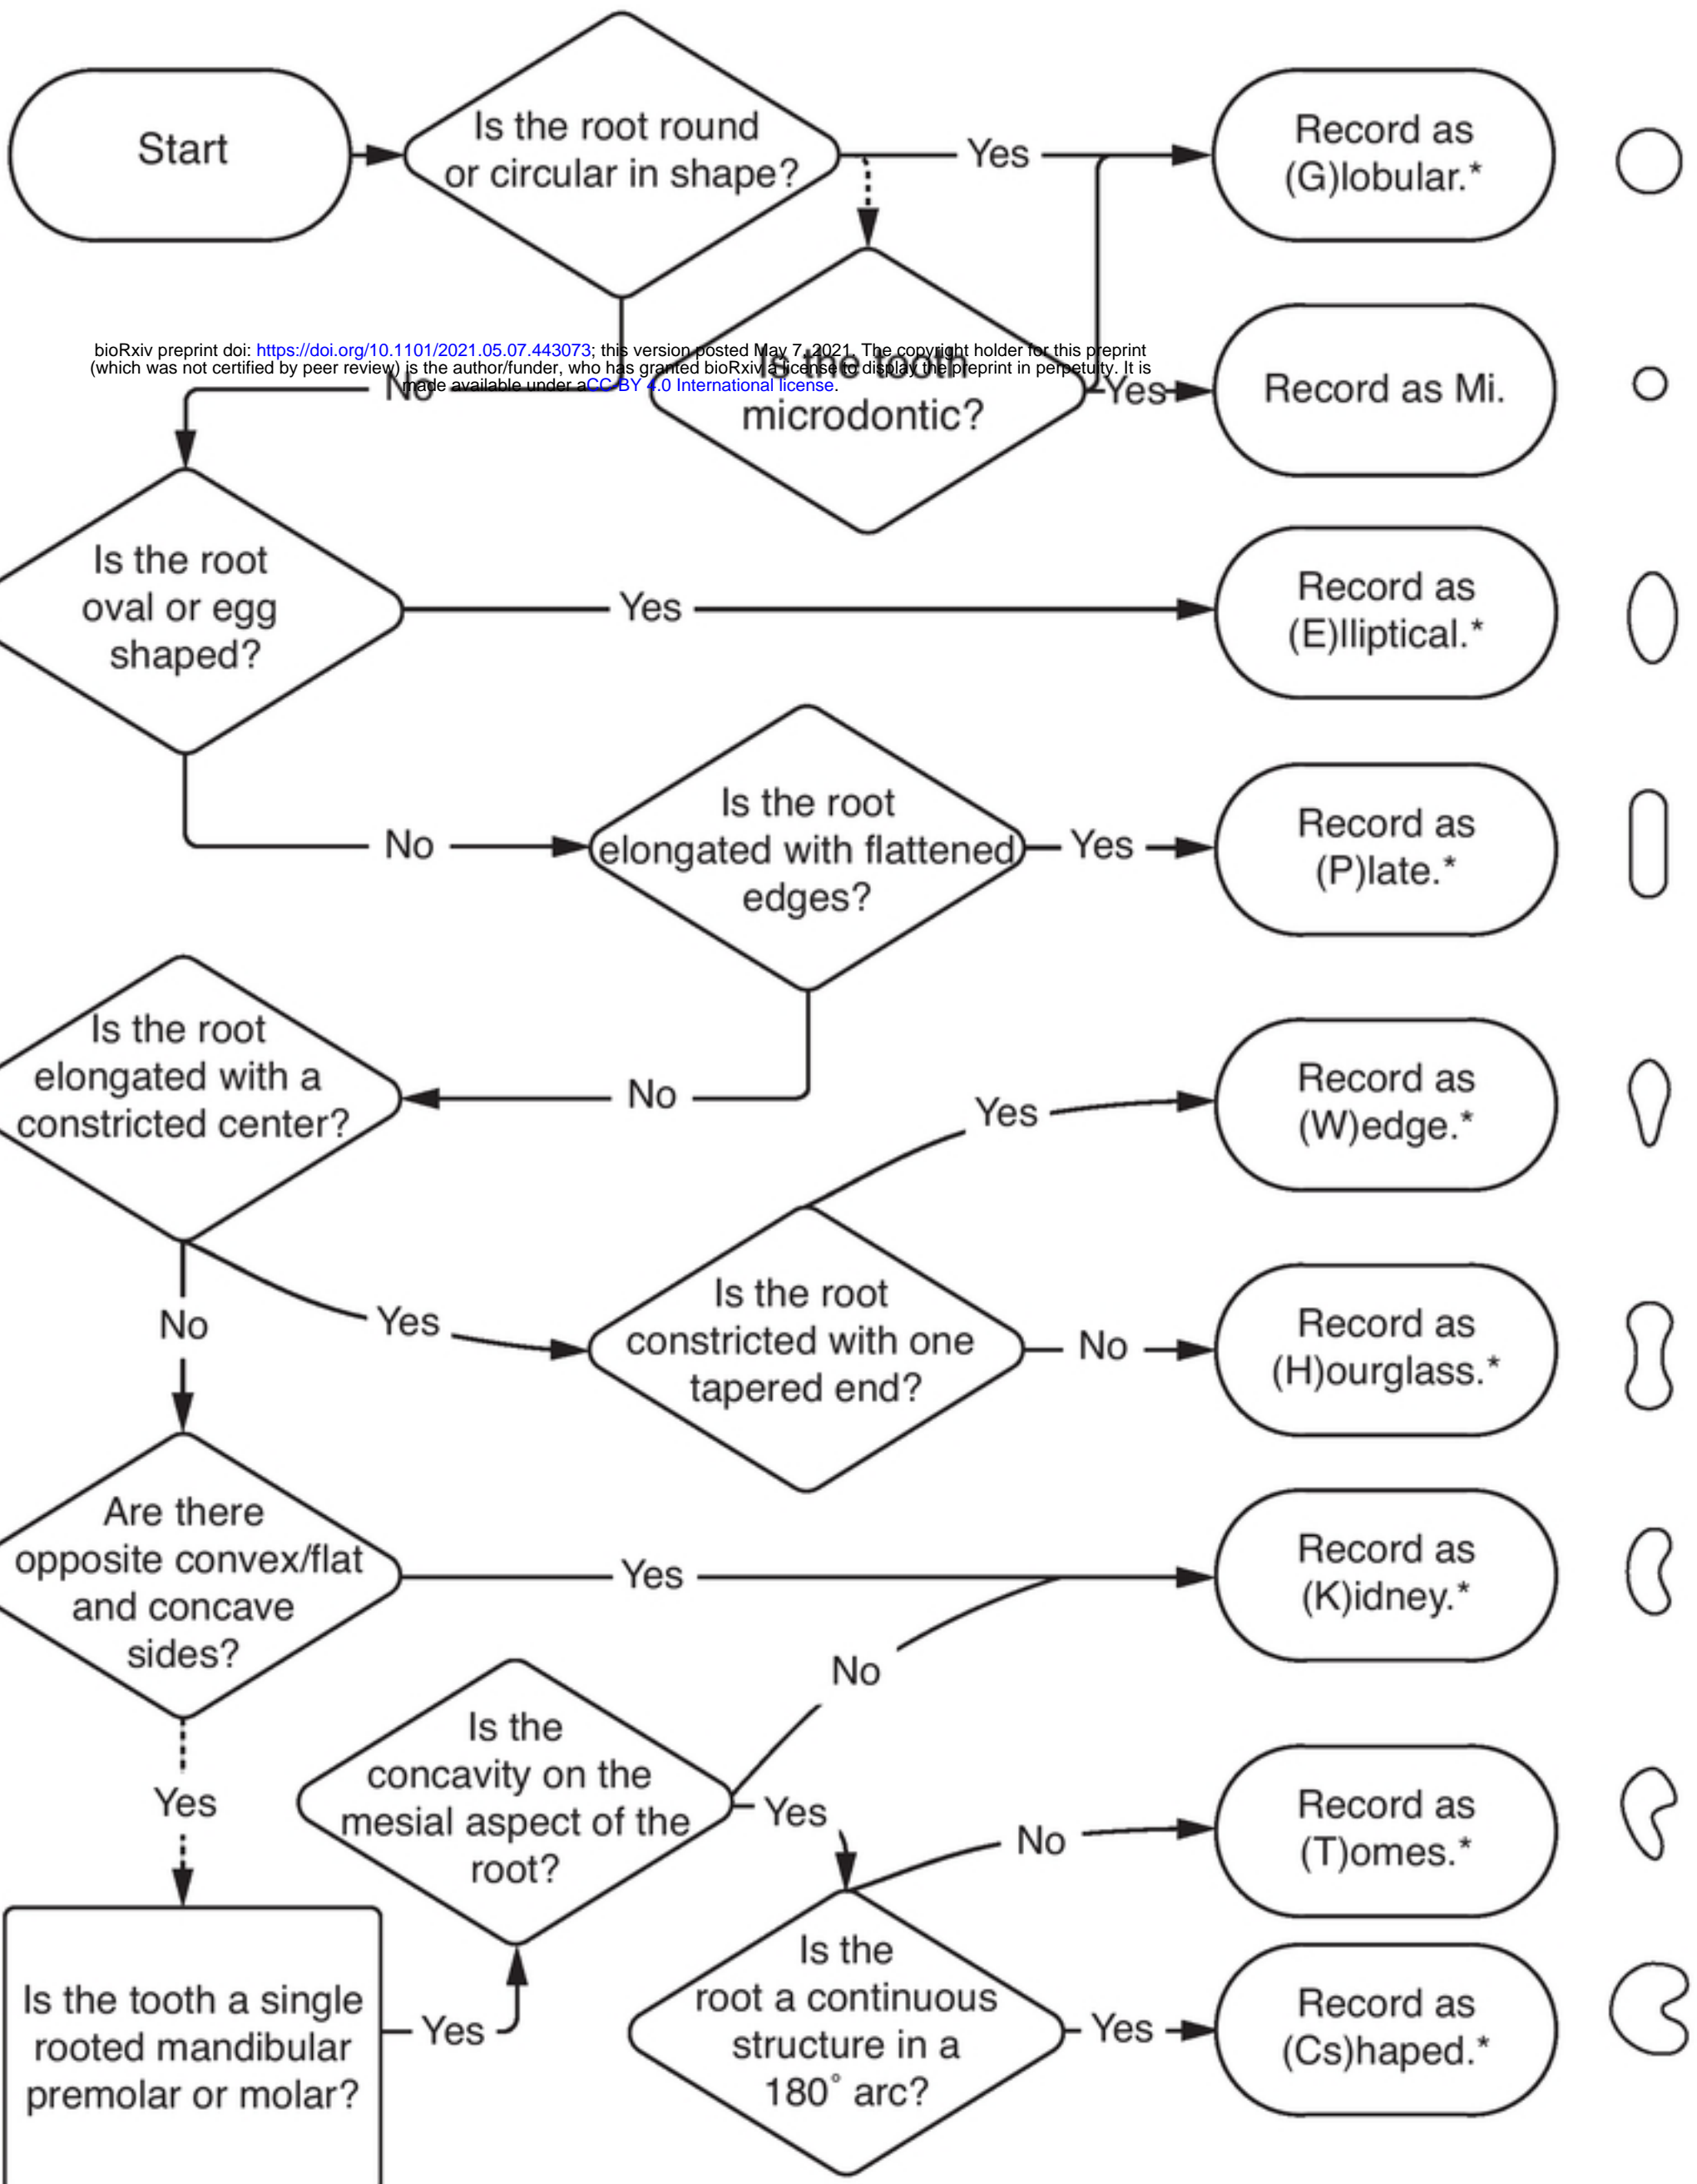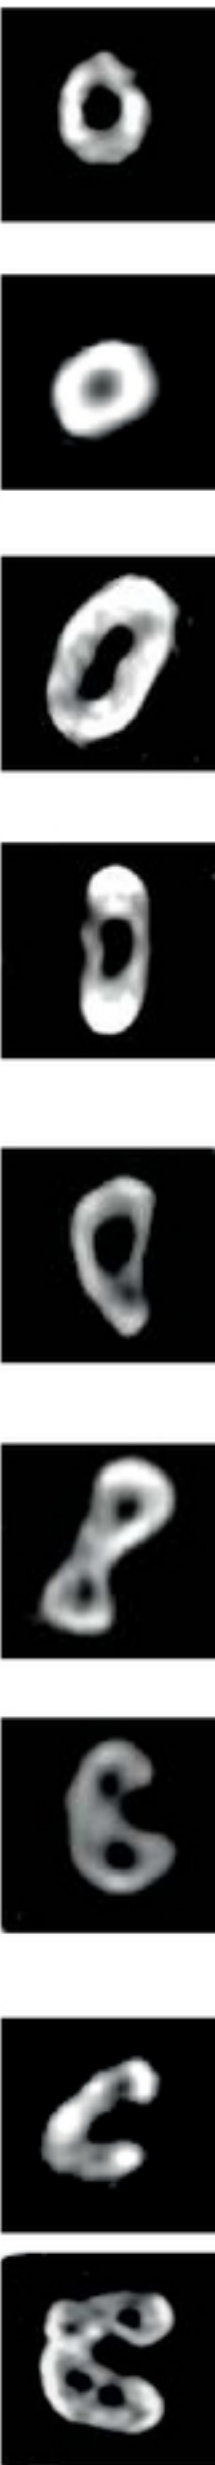

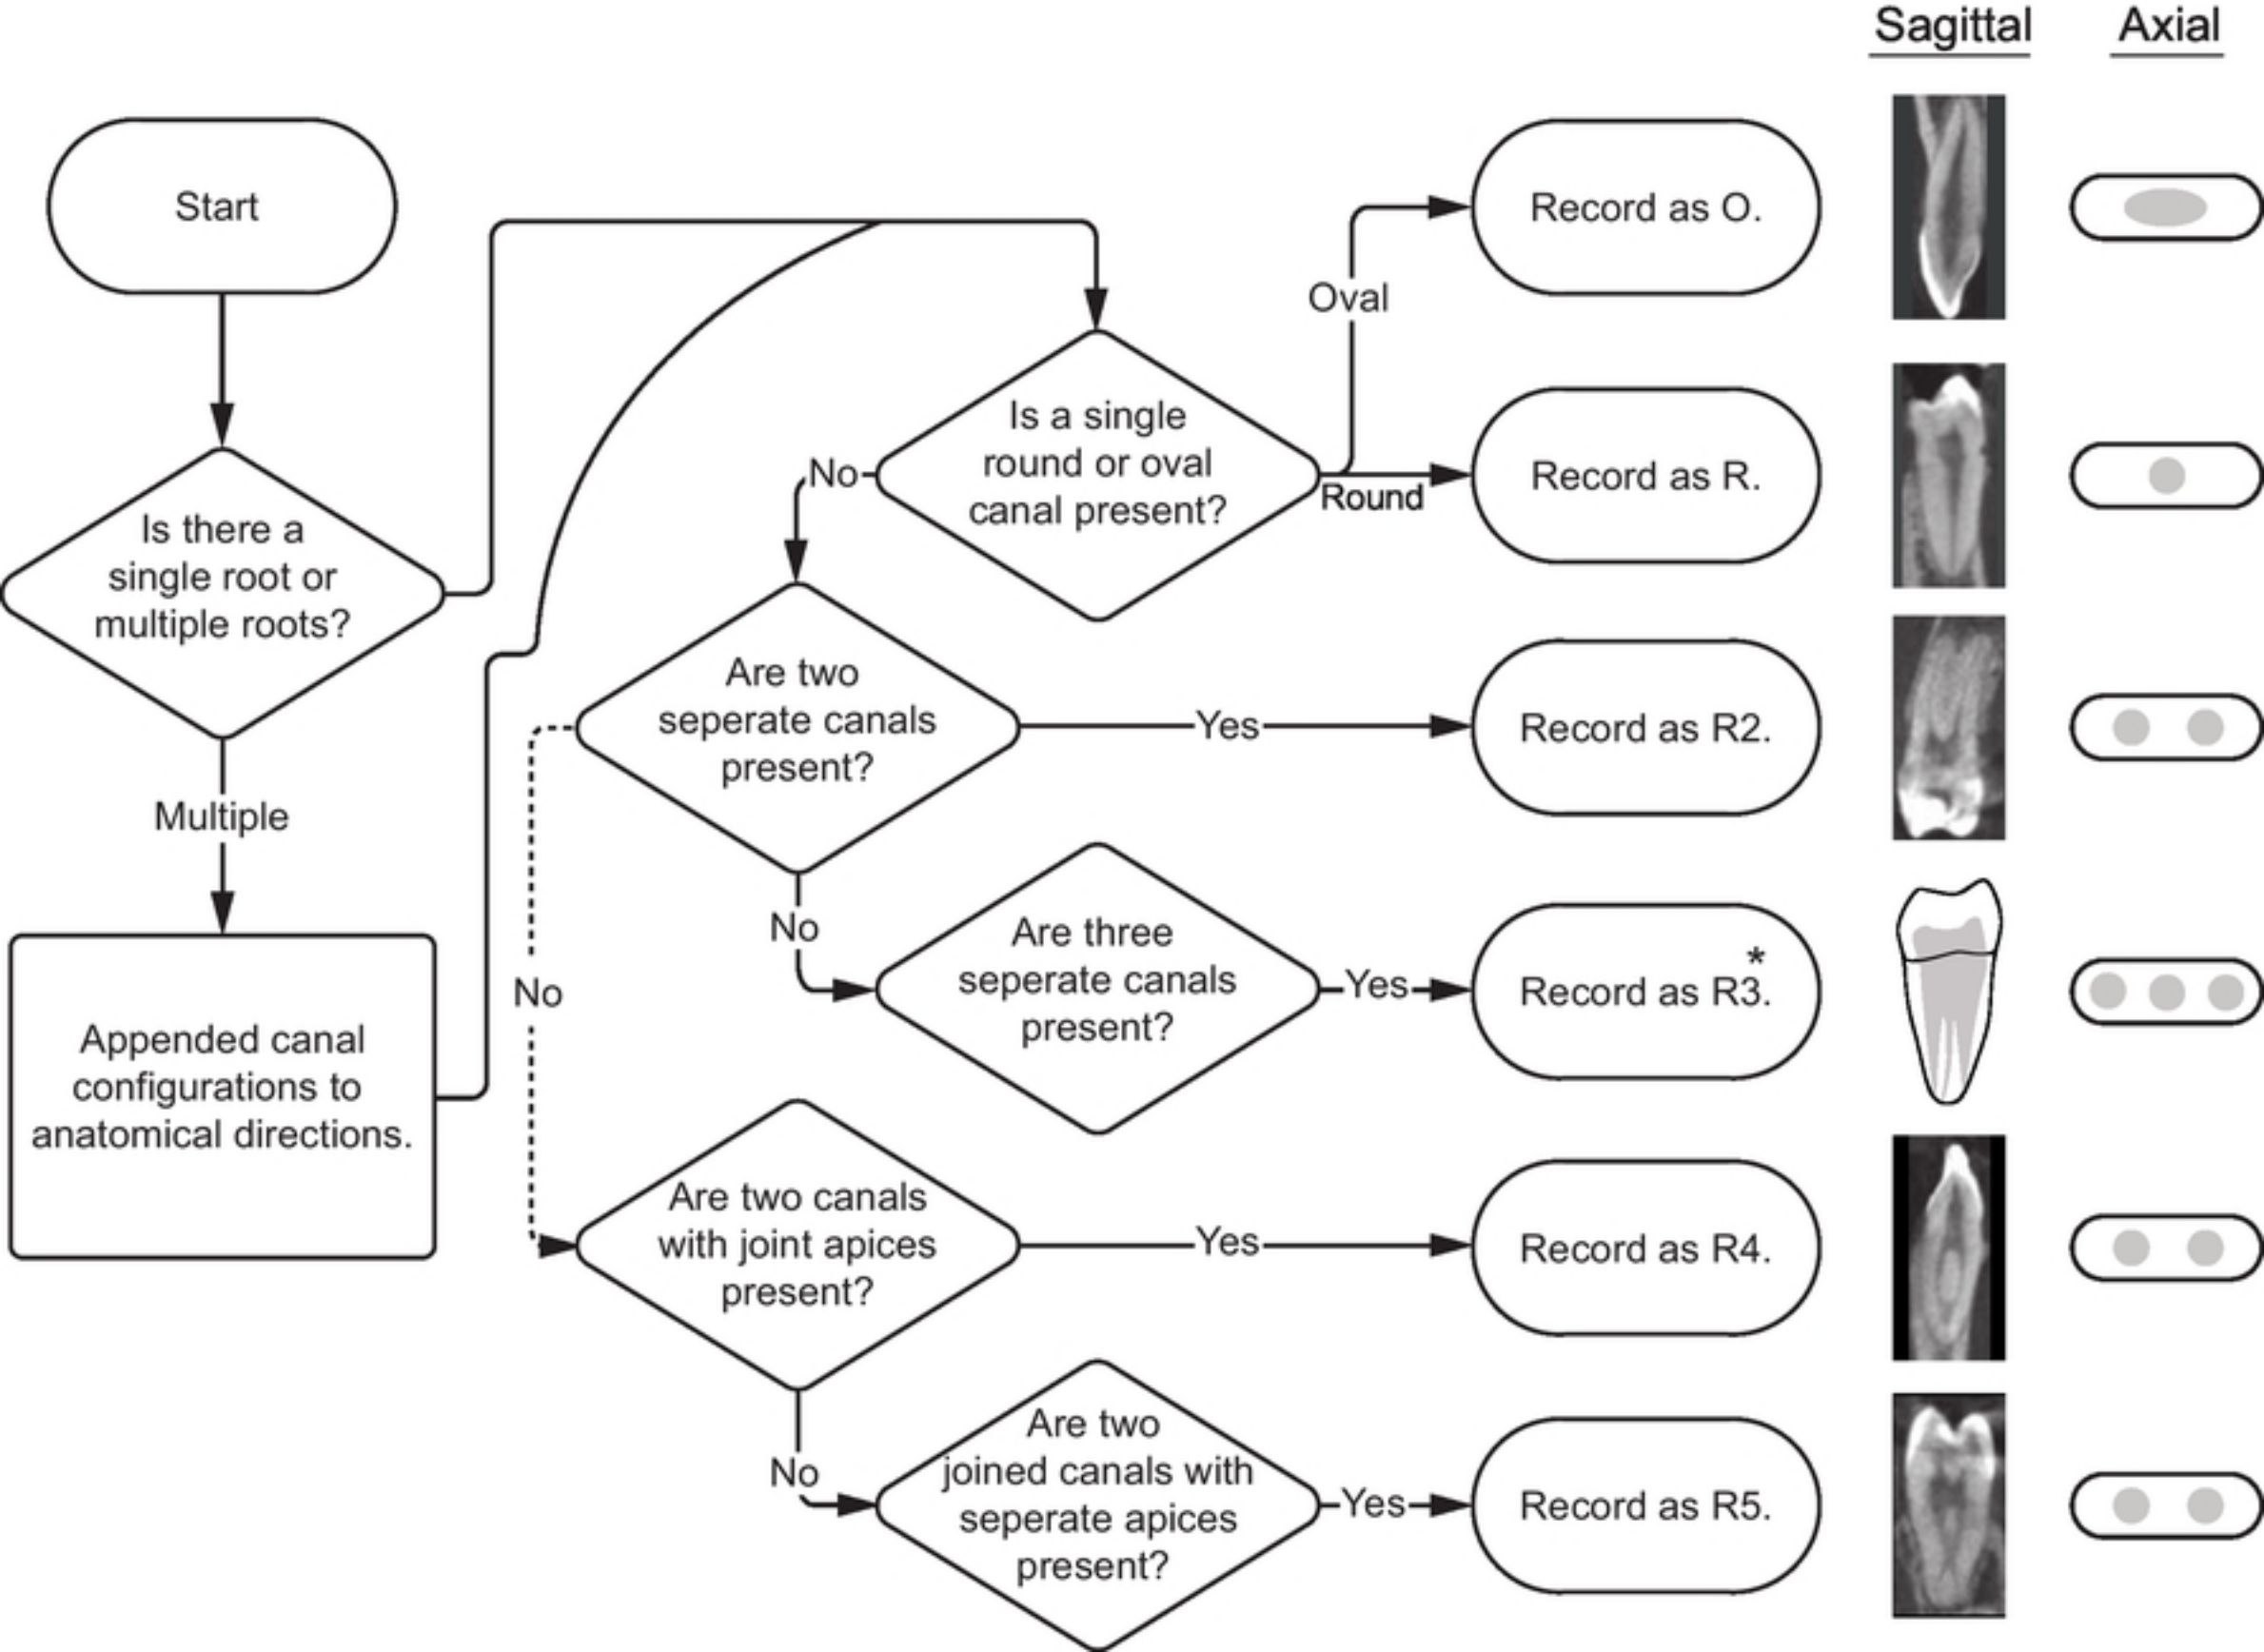

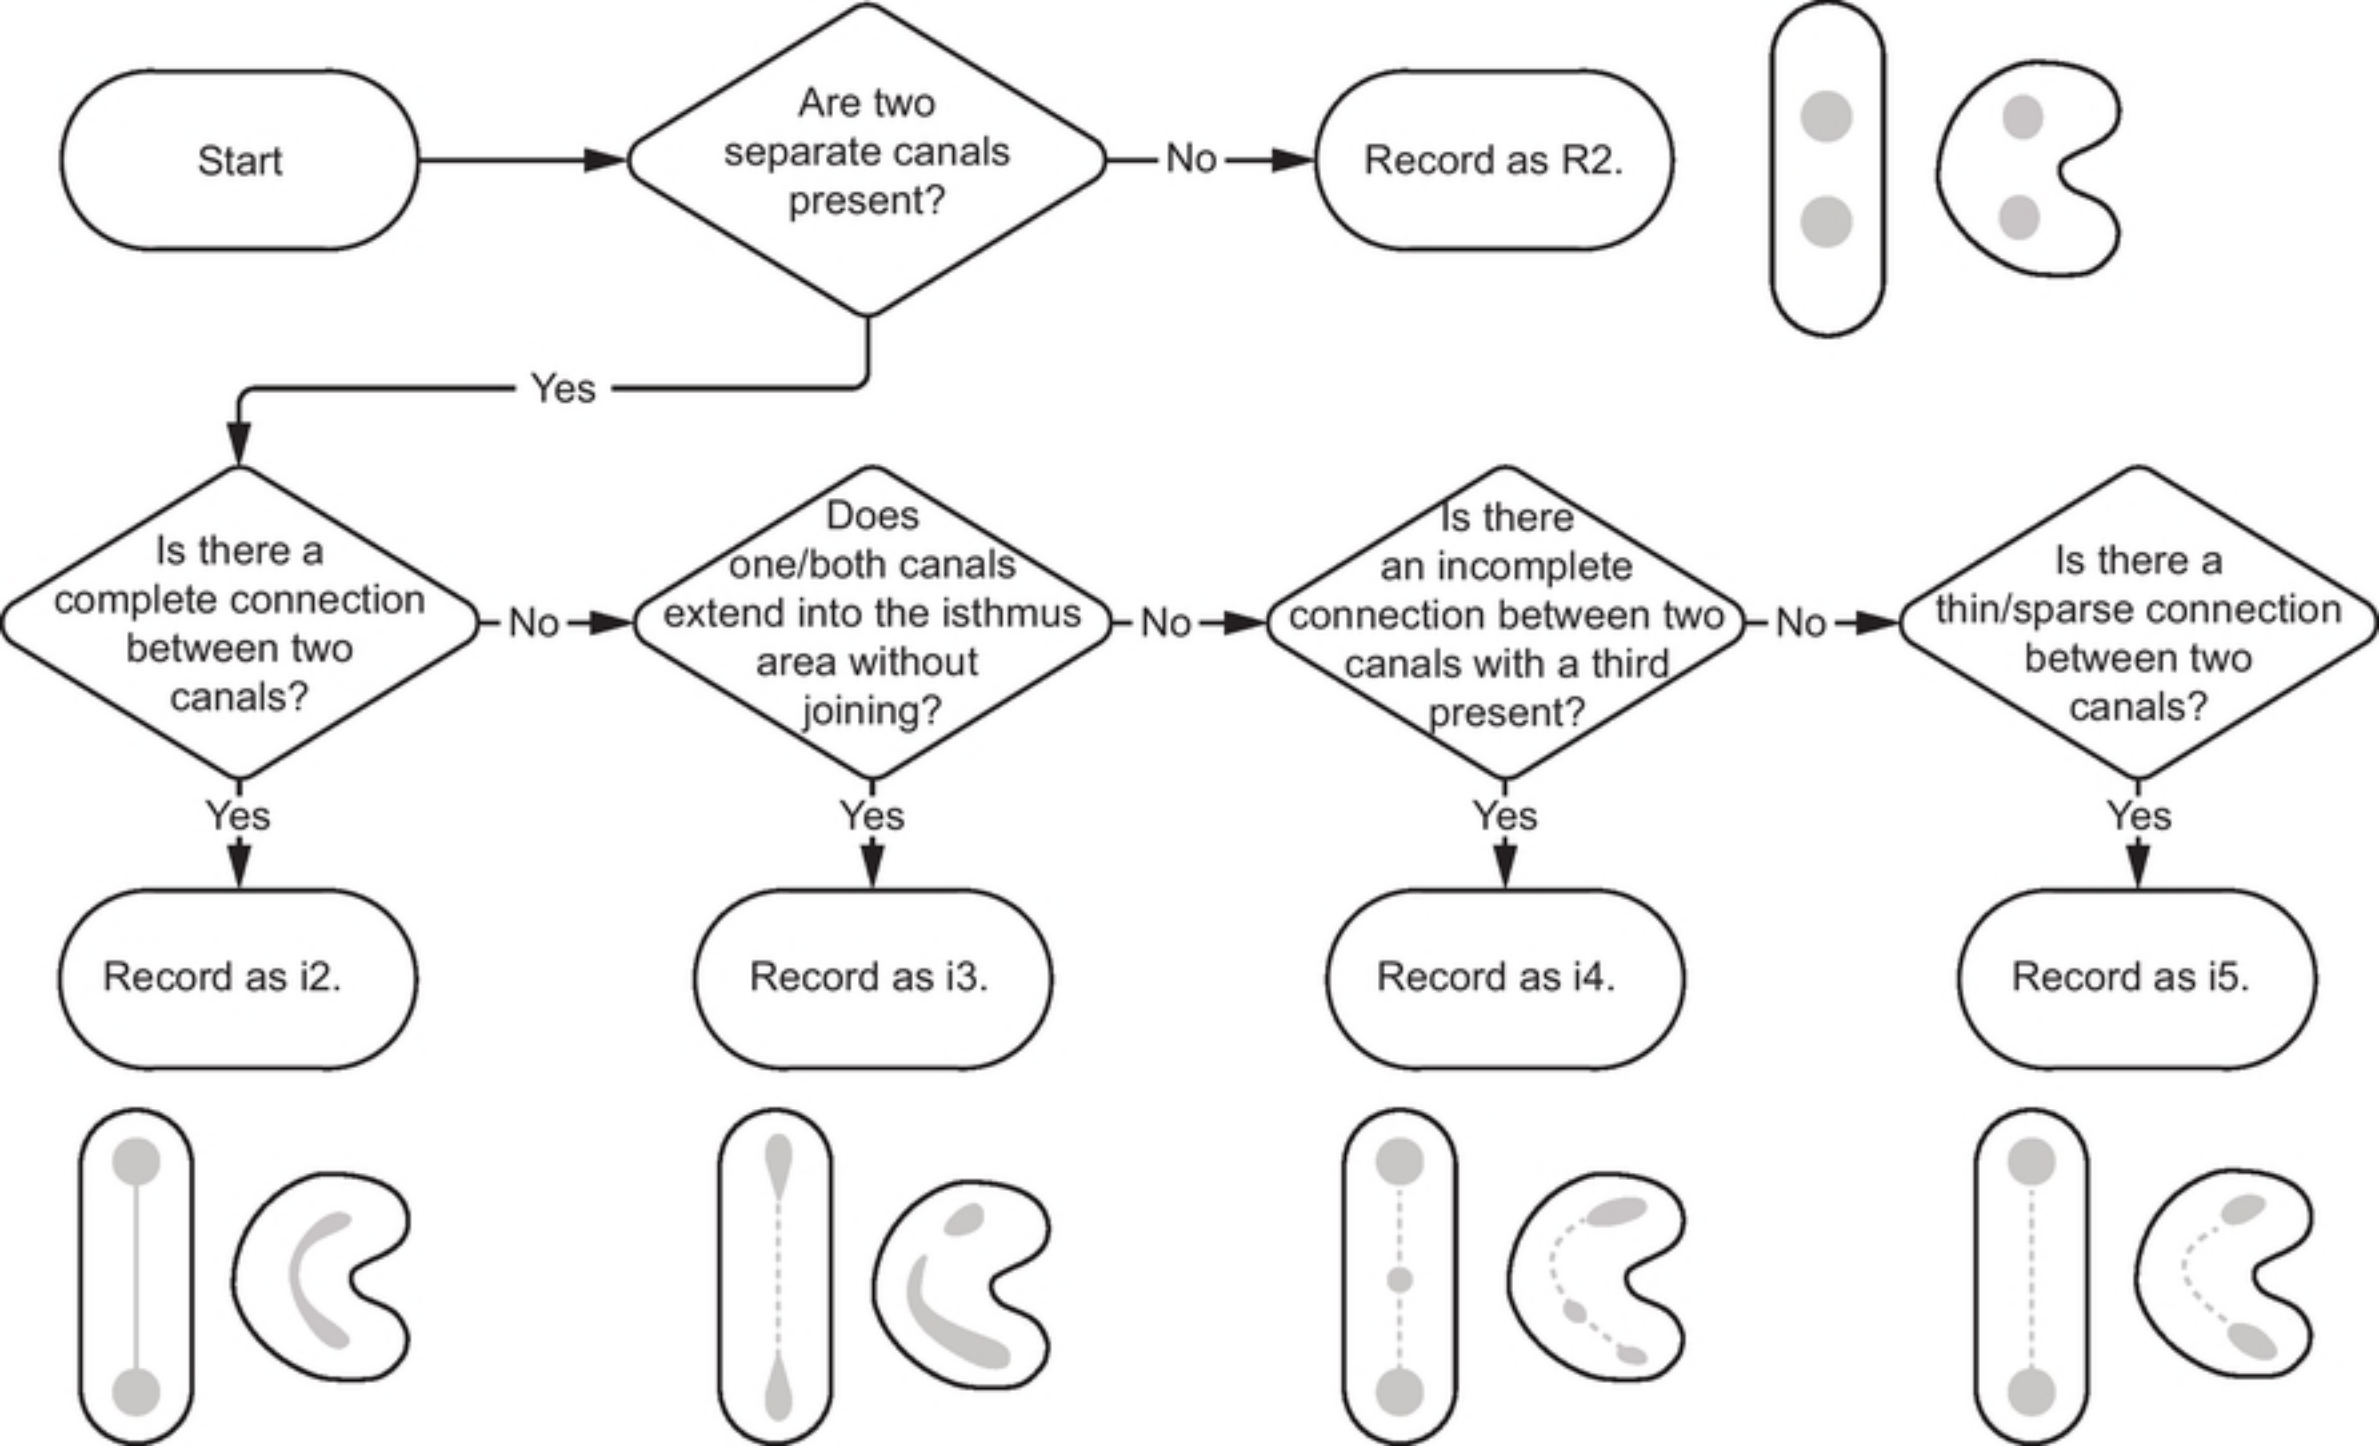

A

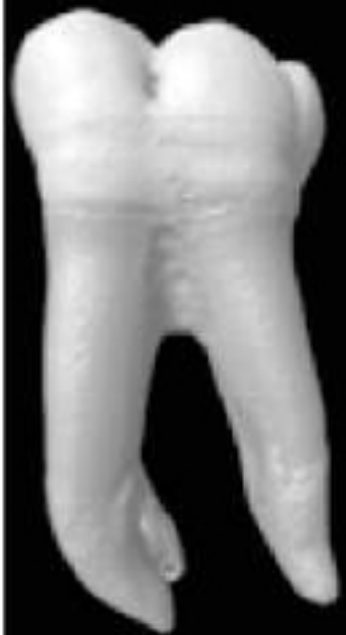

B

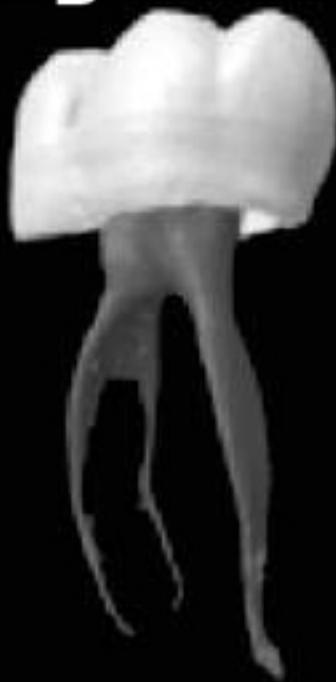

C

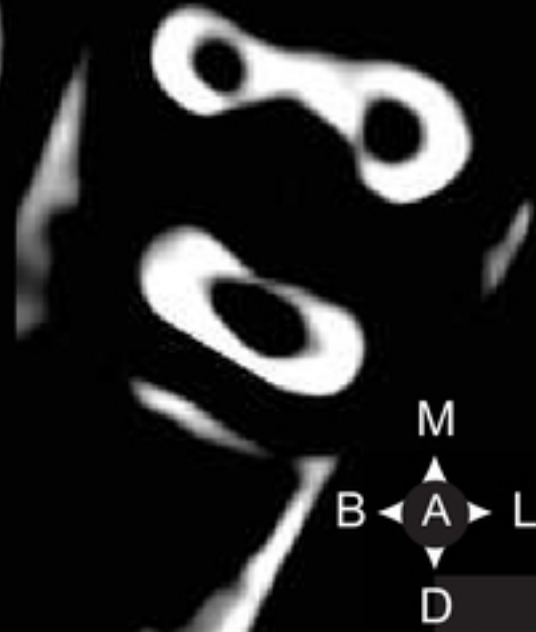

D

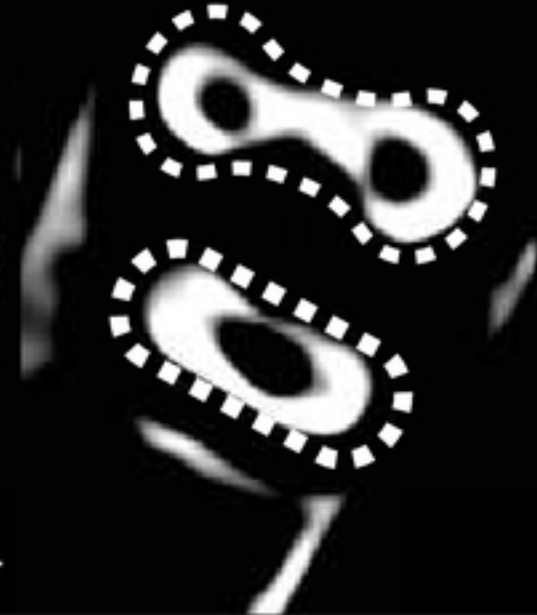

E

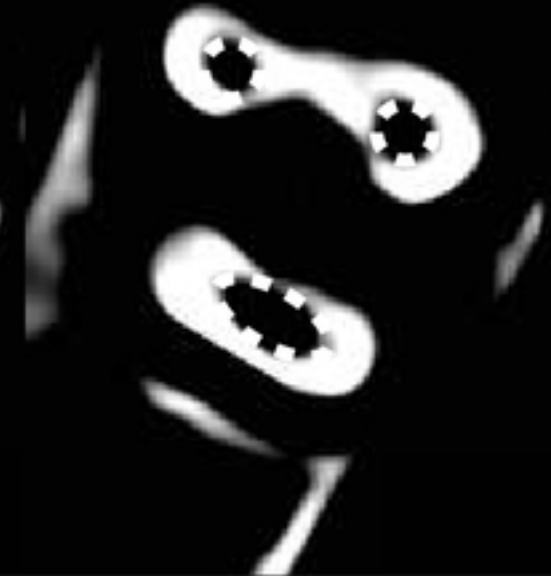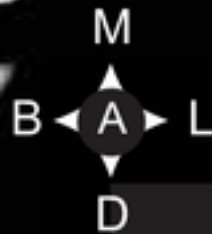

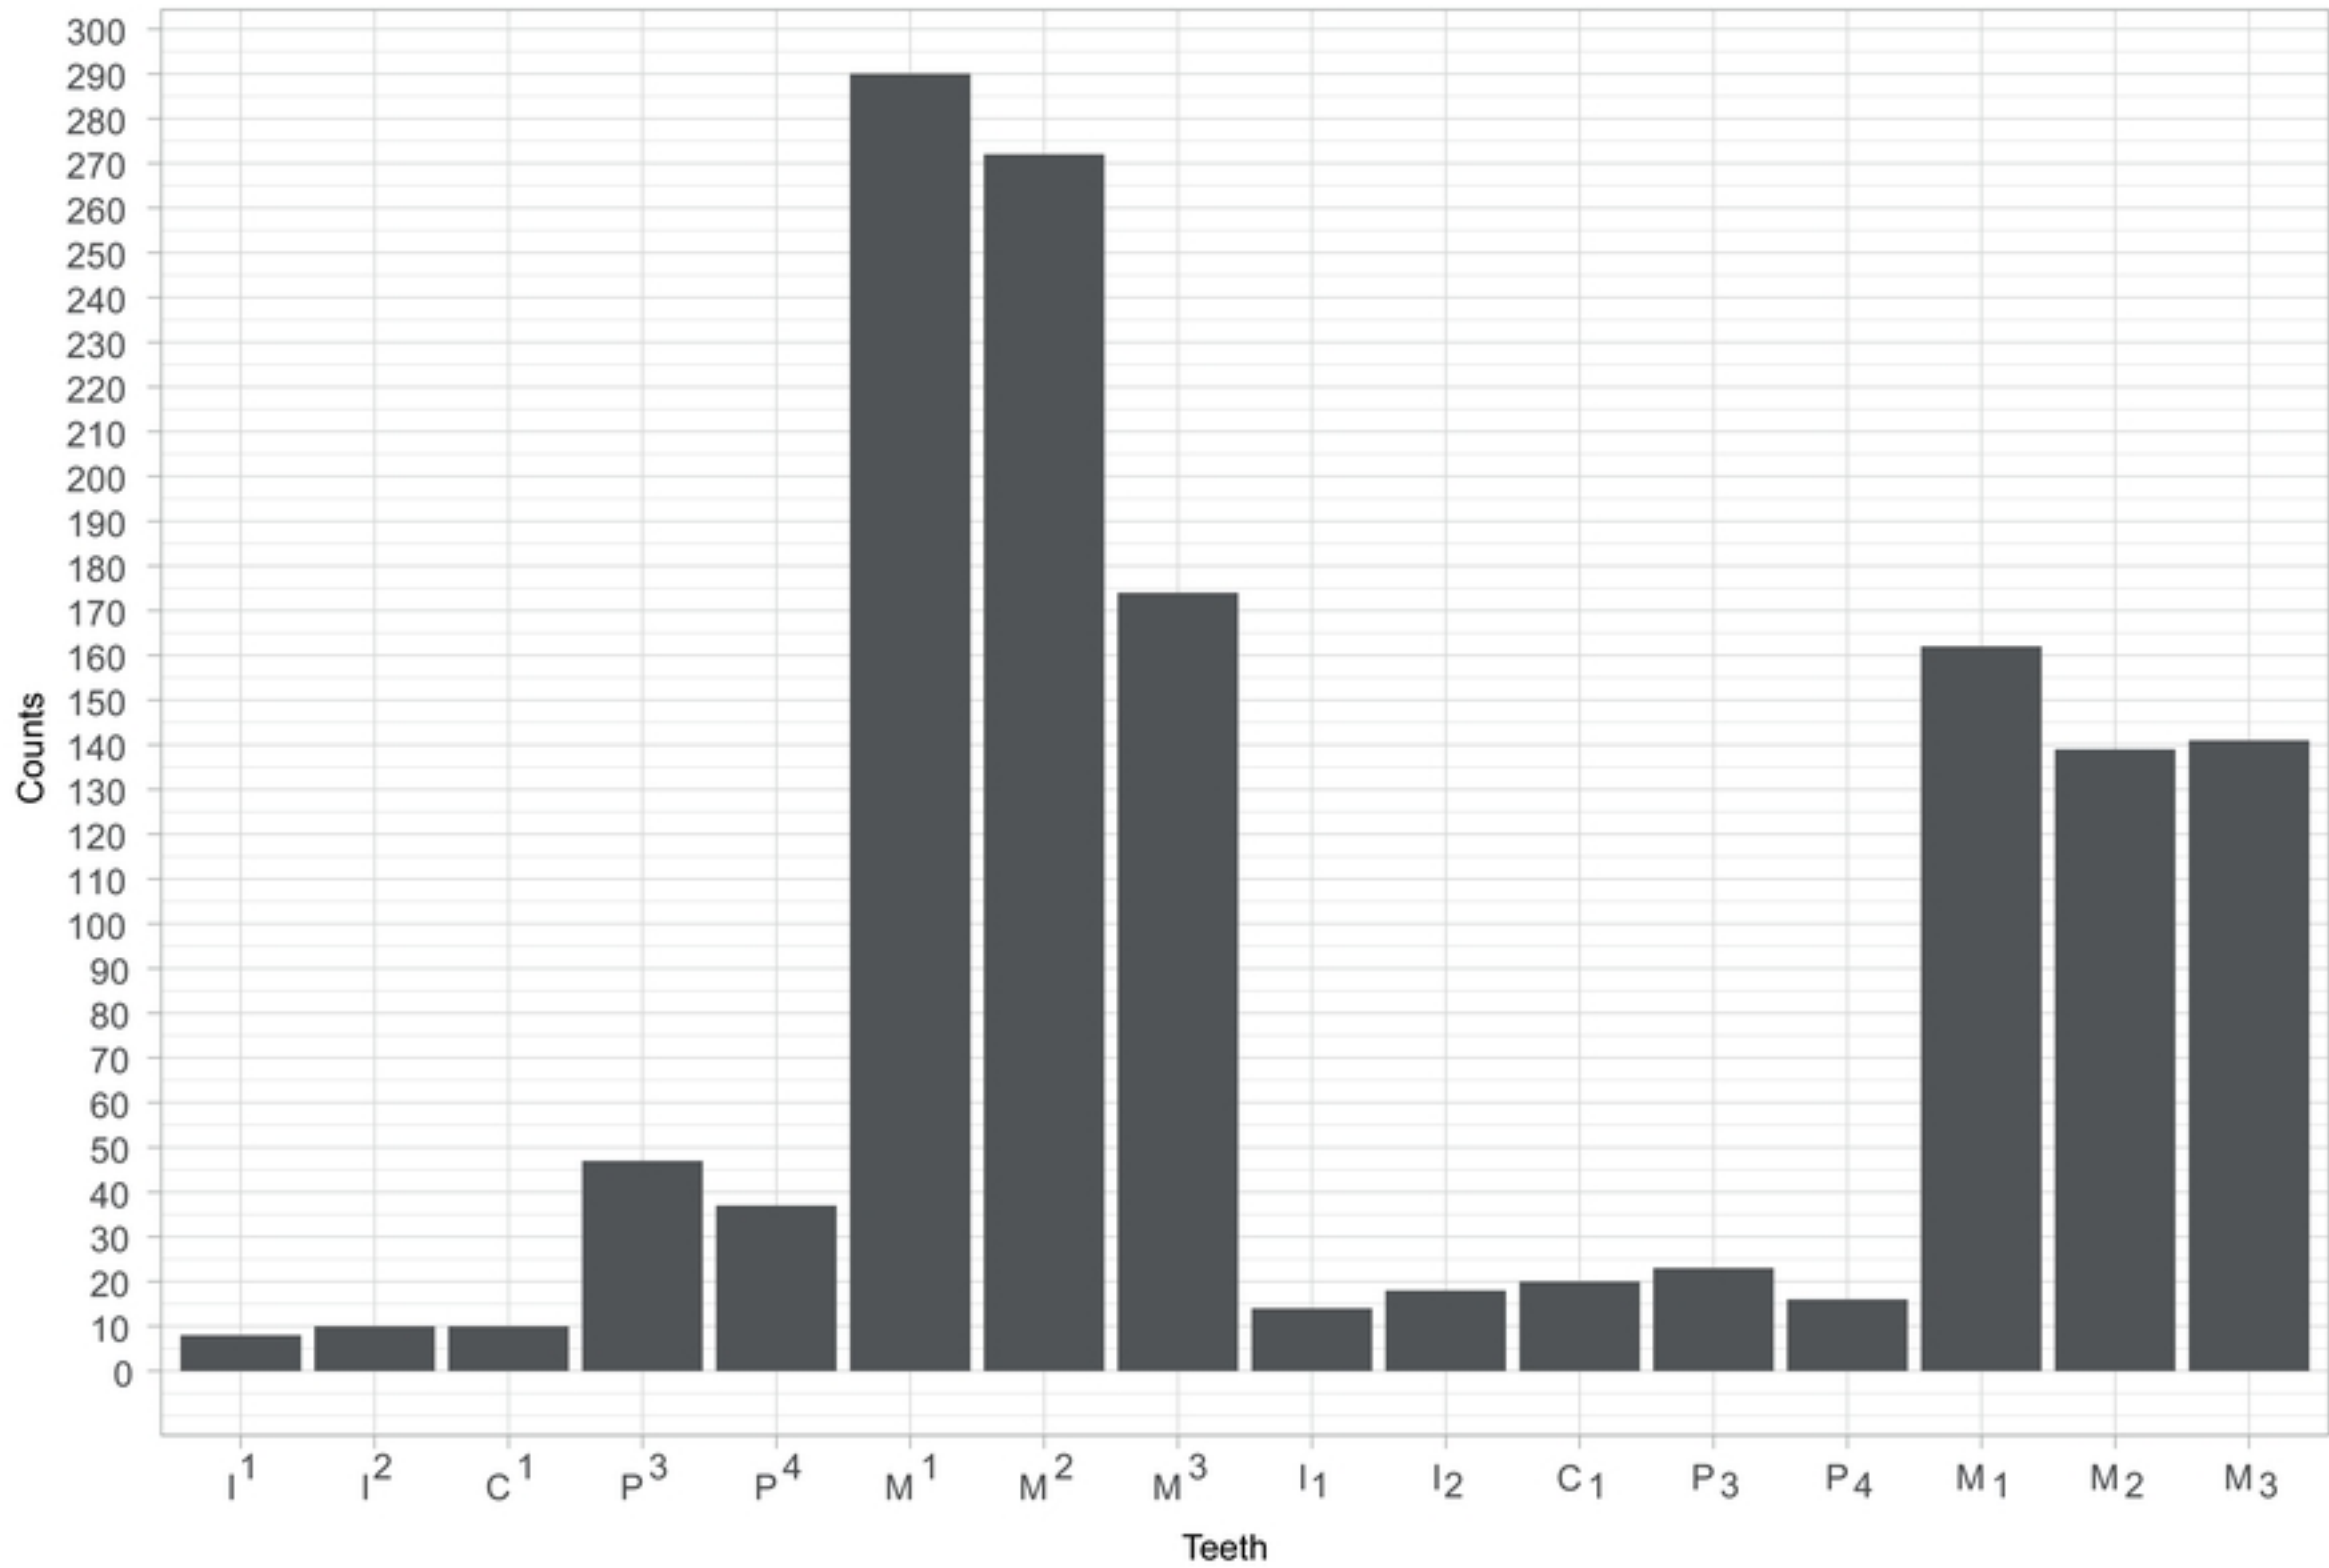

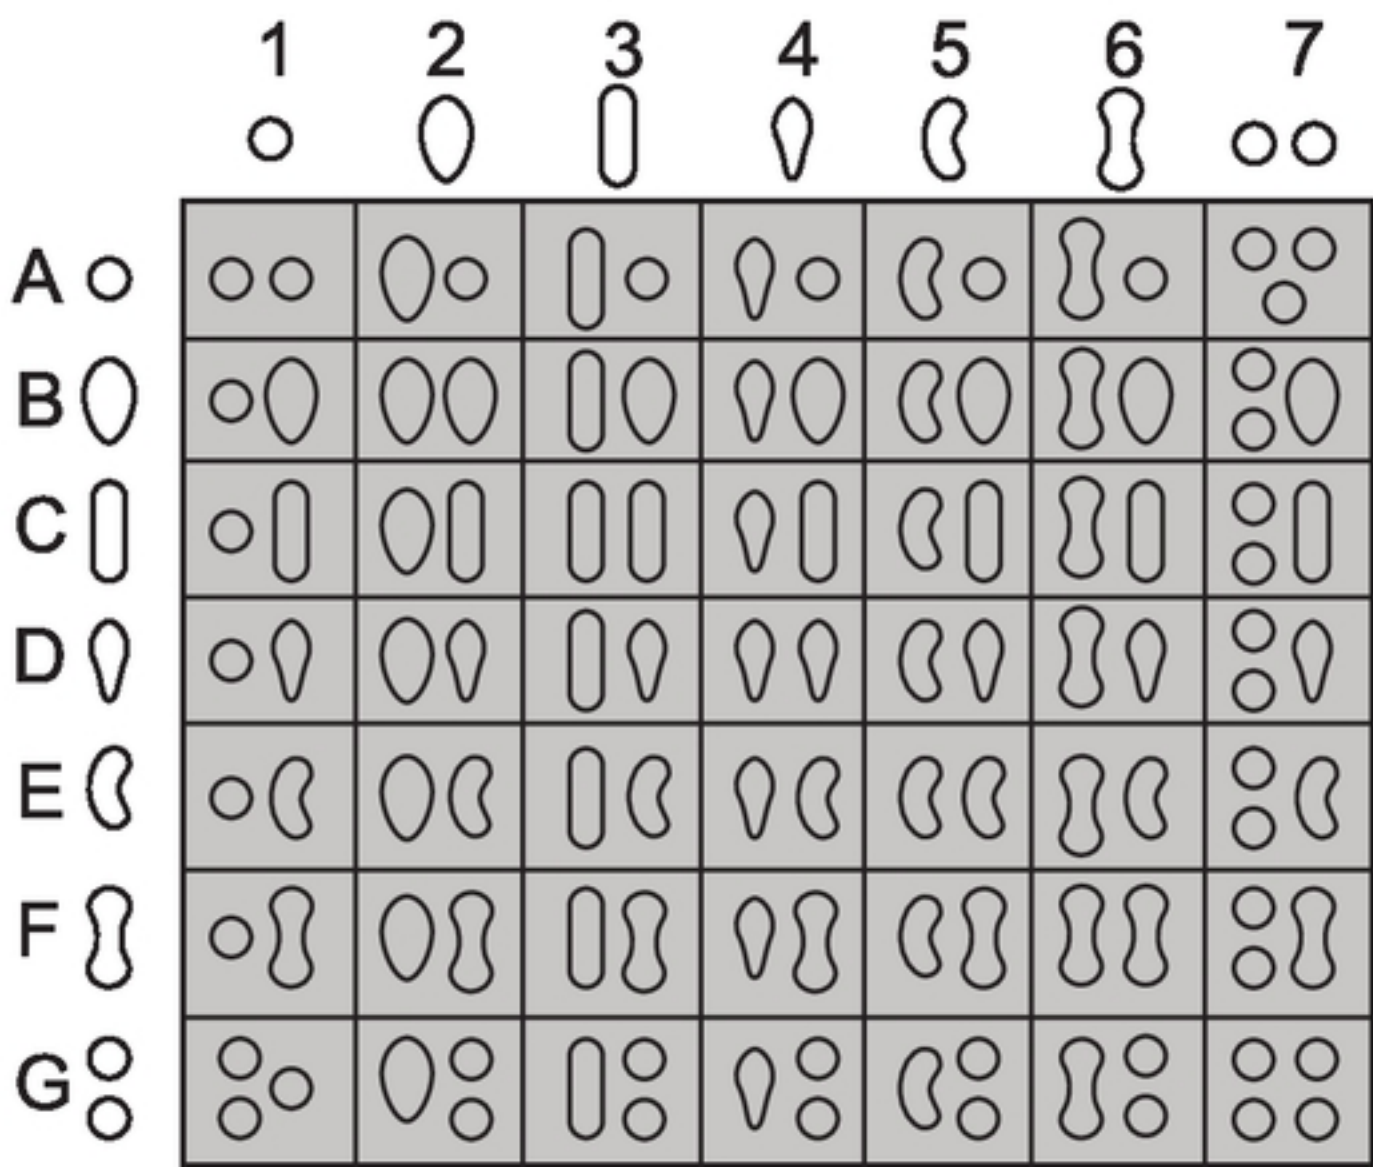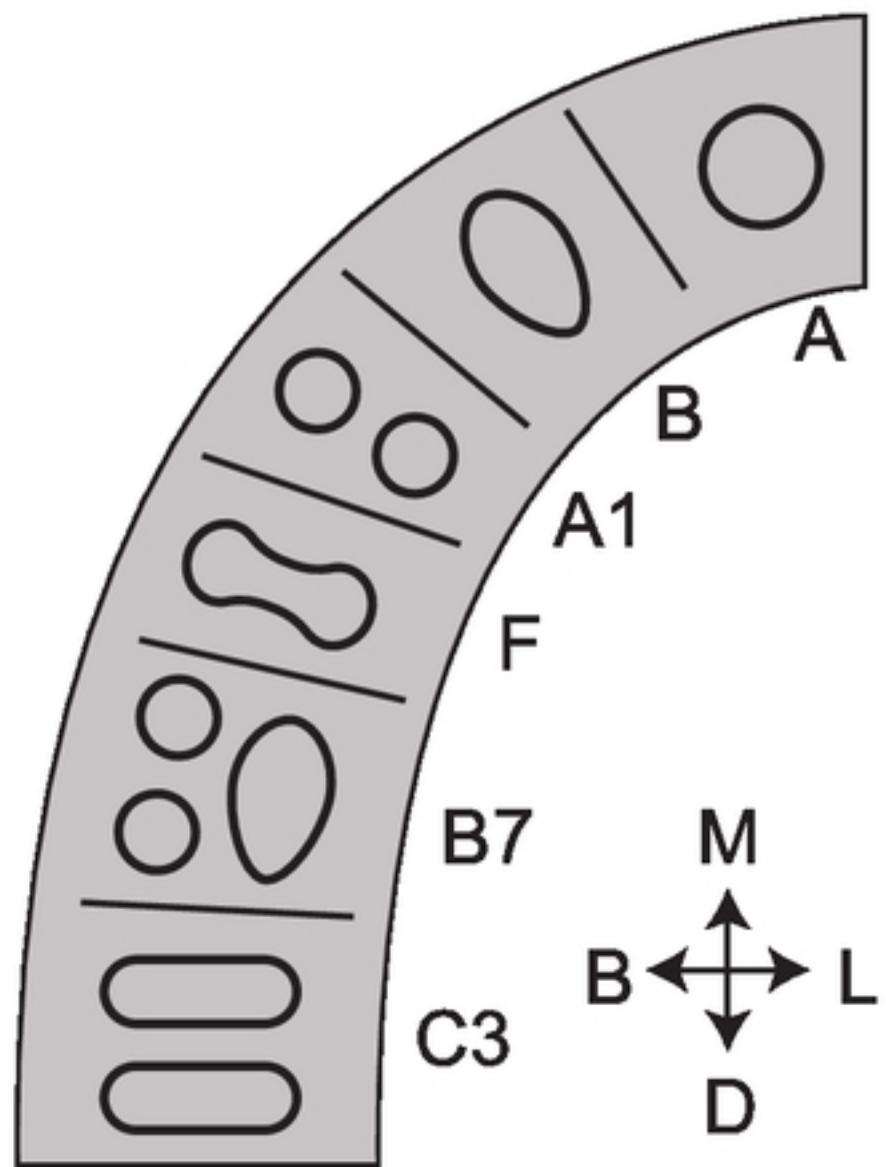

Source: https://www.biorxiv.org/content/biorxiv/early/2021/05/07/2021.05.07.443073.full.pdf
